# Supplementary material for: Theoretical studies on the first proton macroaffinity of Ni(ii), Cu(ii), Zn(ii) and Cd(ii) complexes of four triazacycloalkanes ([X]ane N3, X = 9–12): good correlations with the formation constants in solution
Source: Royal Society of Chemistry journal article supplement (doi:10.1039/b822260f), 2009-01-01
Supplement: b822260f.pdf [file b822260f.pdf]

## Supplementary Information

To

# **Theoretical Studies on the First Proton Macroaffinity of Ni(II), Cu(II), Zn(II) and Cd(II) Complexes of four Triazacycloalkanes ( [X] ane N<sub>3</sub>, X = 9 – 12 ) : Good Correlations with the Formation Constants in Solution**

Sadegh Salehzadeh<sup>\*</sup>, Amir Shooshtari, Mehdi Bayat

<sup>a</sup> Faculty of Chemistry, Bu-Ali Sina University, Hamedan, Iran

---

\*Corresponding Author, Fax: +98(811)8257407, E-Mail: [saleh@basu.ac.ir](mailto:saleh@basu.ac.ir)

## List of Contents

Page

### 1- Illustration of optimized structures:

- Fig. S1:** The optimized structures for all  $[\text{CdL}]^{2+}$  complexes and their protonated forms,  $[\text{CdHL}]^{3+}$ , at B3lyp/lanl2dz level of theory. 4
- Fig. S2:** The optimized structures for all  $[\text{CuL}]^{2+}$  complexes and their protonated forms,  $[\text{CuHL}]^{3+}$ , at B3lyp/lanl2dz level of theory. 5
- Fig. S3:** The optimized structures for all  $[\text{ZnL}]^{2+}$  complexes and their protonated forms,  $[\text{ZnHL}]^{3+}$ , at B3lyp/lanl2dz level of theory. 6

### 2- Correlation diagrams for proton macroaffinities:

- Fig. S4:** Correlation of  $\text{Log } K_f$  vs. calculated  $\overline{PA}_1$  for the first protonation step of  $[\text{NiL}]^{2+}$ ,  $[\text{CuL}]^{2+}$ ,  $[\text{ZnL}]^{2+}$  and  $[\text{CdL}]^{2+}$  complexes, a, b, c and d, respectively, at B3LYP level of theory. The data are derived from Eq (2) 7
- Fig. S5:** Correlation of  $\text{Log } K_f$  vs. calculated  $\overline{PA}_1$  for the first protonation step of  $[\text{NiL}]^{2+}$ ,  $[\text{CuL}]^{2+}$ ,  $[\text{ZnL}]^{2+}$  and  $[\text{CdL}]^{2+}$  complexes, a, b, c and d, respectively, at B3LYP level of theory. The data are derived from Eq (3) 8

### 3- Corresponding data/energies for calculation of proton microaffinities:

- Table S1** Calculated total energies (Hartree, ZPE +  $E_{cl}$ ), zero point energies and  $E_{cl}$  of the  $[\text{ML}]^{2+}$  complexes and their possible protonated forms at B3LYP level of theory with DZVP2(DZVP for  $\text{Cd}^{2+}$ ) basis set 9

### 4- A Review on corresponding formula for calculation of gas phase macrobasicities 10

### 5-Correlation diagrams for macrobasicities:

- Fig. S6:** Correlation of measured  $G$  in solution vs. calculated  $G$  in the gas phase for the first protonation step of  $[\text{NiL}]^{2+}$ ,  $[\text{CuL}]^{2+}$ ,  $[\text{ZnL}]^{2+}$  and  $[\text{CdL}]^{2+}$  complexes, a, b, c and d, respectively, at the B3LYP level of theory using both the LanL2DZ and DZVP2 (DZVP for  $\text{Cd}^{2+}$ ) basis sets. The data are derived from Eq (S1) 11
- Fig. S7:** Correlation of measured  $G$  in solution vs. calculated  $G$  in the gas phase for the first protonation step of  $[\text{NiL}]^{2+}$ ,  $[\text{CuL}]^{2+}$ ,  $[\text{ZnL}]^{2+}$  and  $[\text{CdL}]^{2+}$  complexes, a, b, c and d, respectively, at the B3LYP level of theory using both the LanL2DZ and DZVP2 (DZVP for  $\text{Cd}^{2+}$ ) basis sets. The data are derived from Eq (S2) 12
- Fig. S8:** Correlation of measured  $G$  in solution vs. calculated  $G$  in the gas phase for the first protonation step of  $[\text{NiL}]^{2+}$ ,  $[\text{CuL}]^{2+}$ ,  $[\text{ZnL}]^{2+}$  and  $[\text{CdL}]^{2+}$  complexes, a, b, c and d, respectively, at the B3LYP level of theory using both the LanL2DZ and DZVP2 (DZVP for  $\text{Cd}^{2+}$ ) basis sets. The data are derived from Eq (S3) 13
- Fig. S9:** Correlation of measured  $\text{Log } K$  in solution vs. calculated  $\text{Log } K$  in the gas phase for the first protonation step of  $[\text{NiL}]^{2+}$ ,  $[\text{CuL}]^{2+}$ ,  $[\text{ZnL}]^{2+}$  and  $[\text{CdL}]^{2+}$  complexes, a, b, c and d, respectively, at the B3LYP level of theory using both the LanL2DZ and DZVP2 (DZVP for  $\text{Cd}^{2+}$ ) basis sets. The  $K$  values for the gas phase were calculated from the equation  $\Delta G = -RT \ln K$ , where the  $G$  values were derived from Eq (S1) 14
- Fig. S10:** Correlation of measured  $\text{Log } K$  in solution vs. calculated  $\text{Log } K$  in the gas phase for the first protonation step of  $[\text{NiL}]^{2+}$ ,  $[\text{CuL}]^{2+}$ ,  $[\text{ZnL}]^{2+}$  and  $[\text{CdL}]^{2+}$  complexes, a, b, c and d, respectively, at the B3LYP level of theory using both the LanL2DZ and DZVP2 (DZVP for  $\text{Cd}^{2+}$ ) basis sets. The  $K$  values for the gas phase were calculated from the equation  $\Delta G = -RT \ln K$ , where the  $G$  values were derived from Eq (S2) 15

**Fig. S11:** Correlation of measured  $\text{Log } K$  in solution vs. calculated  $\text{Log } K$  in the gas phase for the first protonation step of  $[\text{NiL}]^{2+}$ ,  $[\text{CuL}]^{2+}$ ,  $[\text{ZnL}]^{2+}$  and  $[\text{CdL}]^{2+}$  complexes, a, b, c and d, respectively, at the B3LYP level of theory using both the LanL2DZ and DZVP2 (DZVP for  $\text{Cd}^{2+}$ ) basis sets. The  $K$  values for the gas phase were calculated from the equation  $\Delta G = -RT \ln K$ , where the  $G$  values were derived from Eq (S3).

16

## 6- Calculated microbasicities:

**Table S2:** Calculated microbasicities,  $-\Delta G_i$ , of the  $[\text{ML}]^{2+}$  complexes at B3LYP level of theory using DZVP2 in the case of  $[\text{NiL}]^{2+}$ ,  $[\text{CuL}]^{2+}$  and  $[\text{ZnL}]^{2+}$  complexes and DZVP for  $[\text{CdL}]^{2+}$  complexes.<sup>a</sup>

17

**Table S3:** Comparison between the experimental  $\Delta G$  values for formation of  $[\text{ML}]^{2+}$  complexes and calculated first macrobasicities at B3LYP level of theory using DZVP2 in the case of  $[\text{NiL}]^{2+}$ ,  $[\text{CuL}]^{2+}$  and  $[\text{ZnL}]^{2+}$  complexes and DZVP for  $[\text{CdL}]^{2+}$  complexes<sup>a</sup>

18

**Table S4:** Comparison between calculated protonation macroconstants of  $[\text{ML}]^{2+}$  complexes calculated at B3LYP level of theory using DZVP2 in the case of  $[\text{NiL}]^{2+}$ ,  $[\text{CuL}]^{2+}$  and  $[\text{ZnL}]^{2+}$  complexes and DZVP for  $[\text{CdL}]^{2+}$  complexes<sup>a</sup> and their measured  $G$  in solution.

19

## 7- Calculated $G$ , $G_{\text{corr}}$ and $X_i$ :

**Table S5:** Calculated Gibbs free energies,  $G$ , Thermal correction to Gibbs Free Energy,  $G_{\text{corr}}$ , and Maxwell-Boltzmann distribution,  $X_i$ , population for  $[\text{NiL}]^{2+}$ ,  $[\text{CuL}]^{2+}$ ,  $[\text{ZnL}]^{2+}$  and  $[\text{CdL}]^{2+}$  complexes and their possible protonated forms at B3LYP level of theory using DZVP2 basis set for  $\text{Ni}^{2+}$ ,  $\text{Cu}^{2+}$  and  $\text{Zn}^{2+}$  and DZVP for  $\text{Cd}^{2+}$ .

20

**8- Cartesian coordinate representation of the optimized molecular structure of the  $[\text{ZnL}]^{2+}$ ,  $[\text{CuL}]^{2+}$ ,  $[\text{CdL}]^{2+}$  and  $[\text{NiL}]^{2+}$  complexes of Triazacycloalkanes ( $[\text{X}]$  and  $\text{N}_3$ ,  $\text{X} = 9 - 12$ ) and their possible protonated forms at B3LYP/LanL2DZ and B3LYP/DGDZVP2 level of theory B3LYP/LanL2DZ.**

21-71

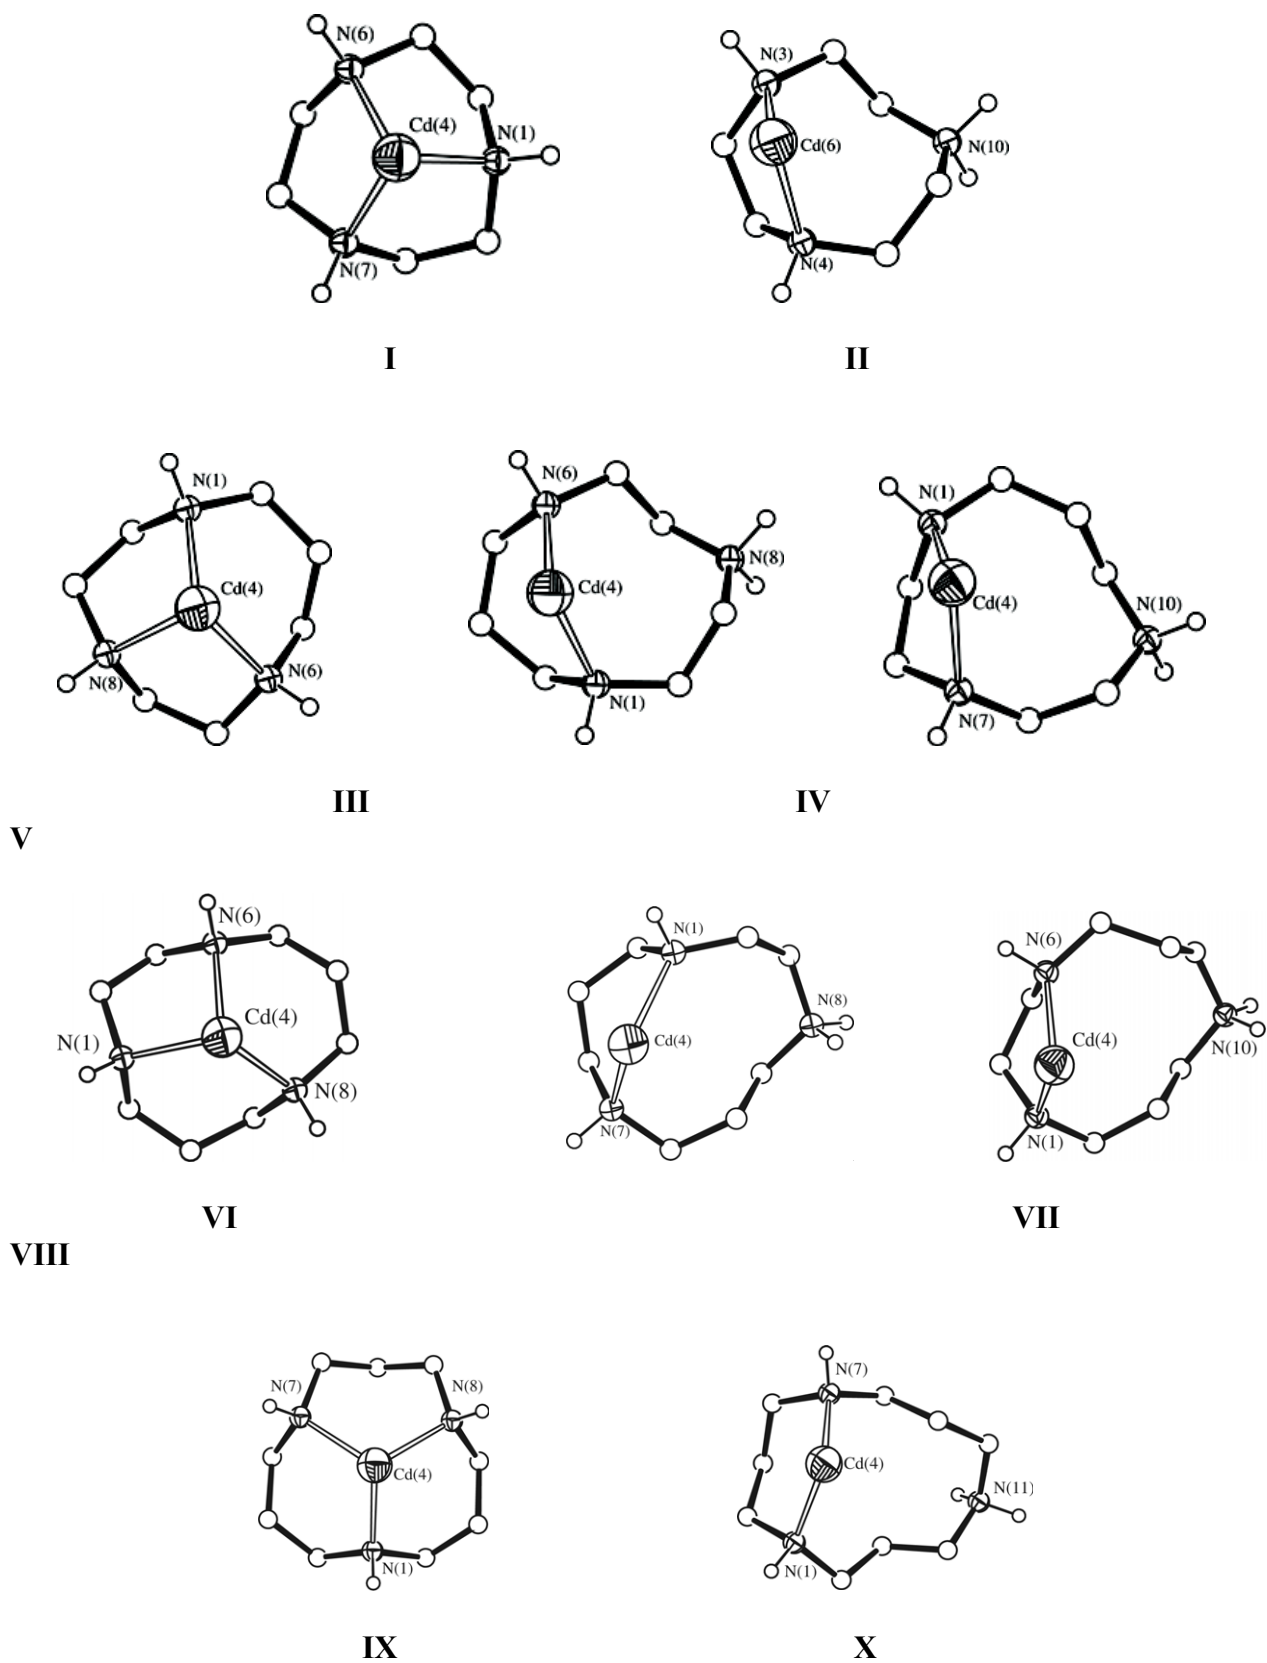

**Fig. S1:** The optimized structures for all  $[\text{CdL}]^{2+}$  complexes and their protonated forms,  $[\text{CdHL}]^{3+}$ , at B3lyp level of theory

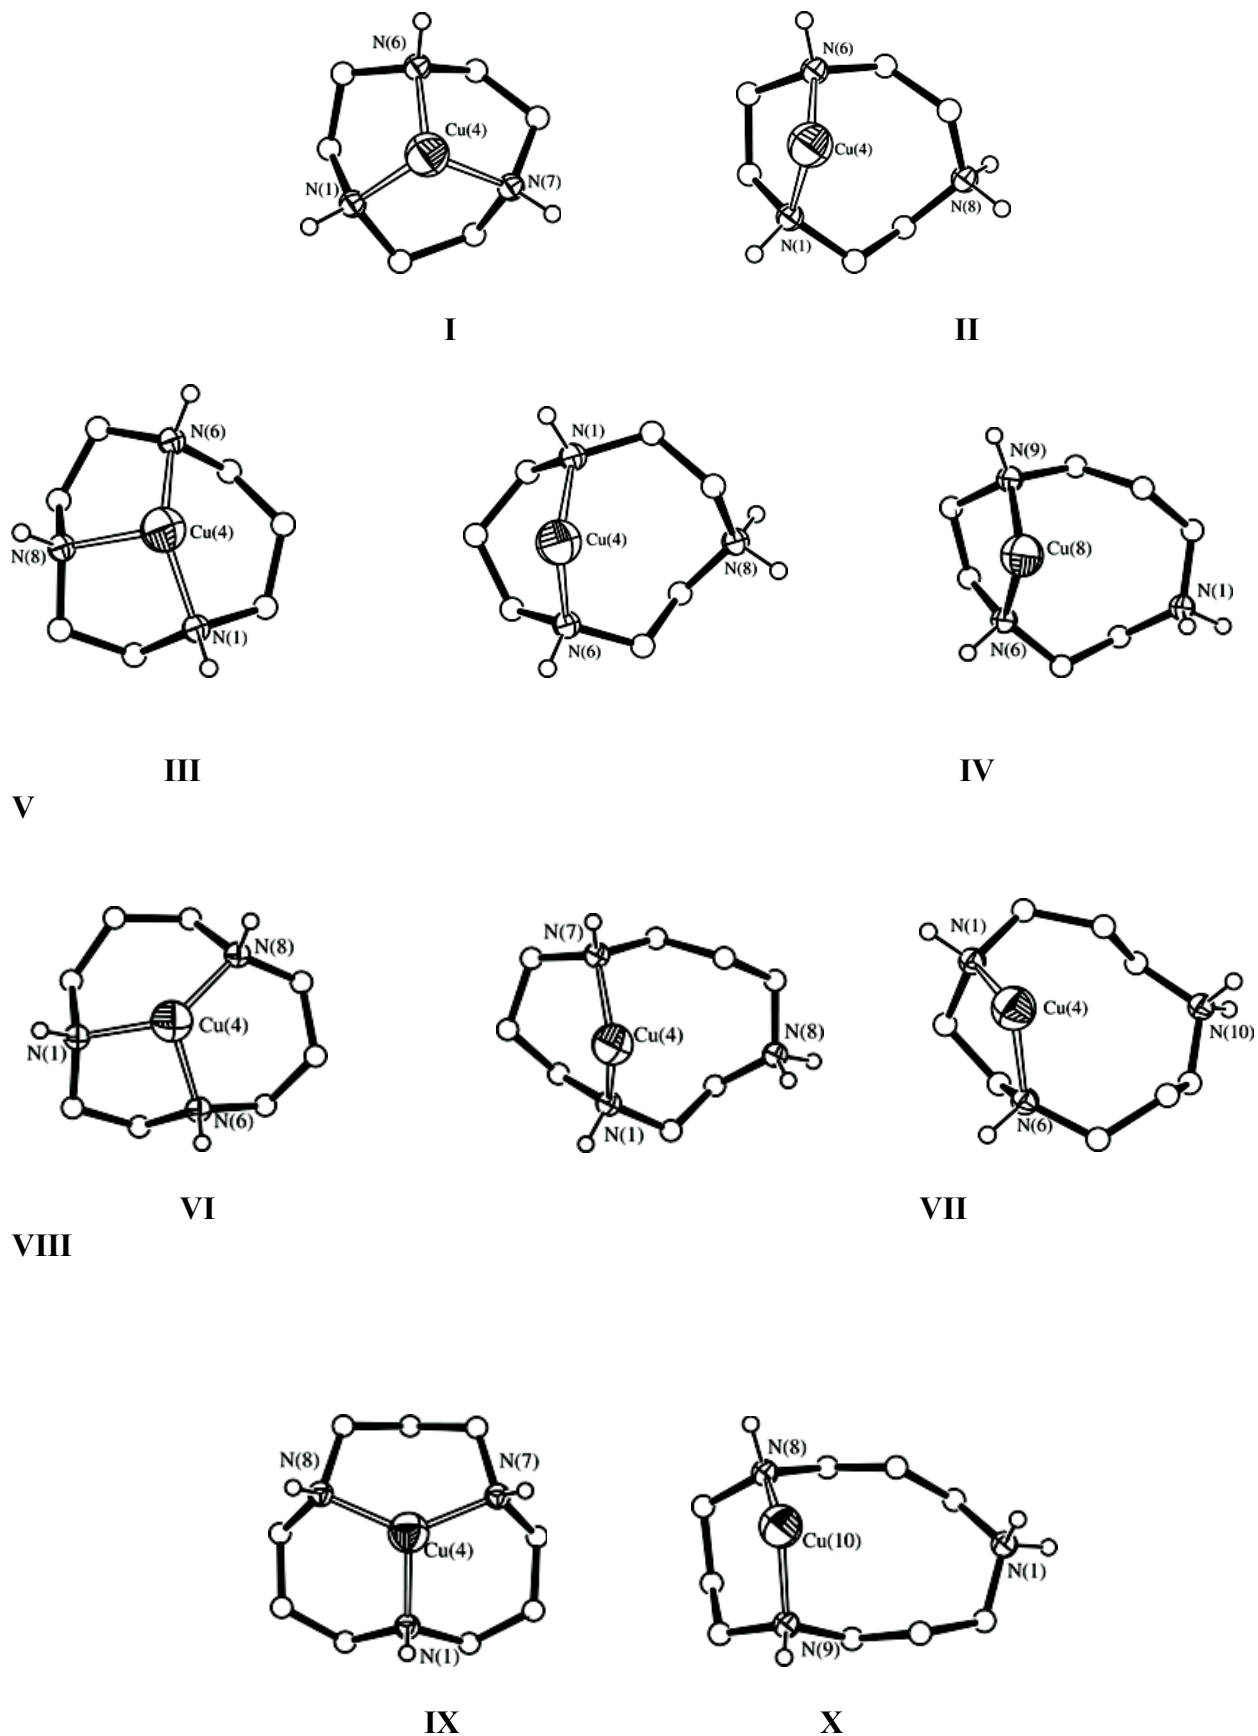

**Fig. S2:** The optimized structures for all  $[\text{CuL}]^{2+}$  complexes and their protonated forms,  $[\text{CuHL}]^{3+}$ , at B3lyp level of theory

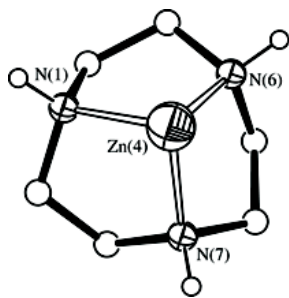

I

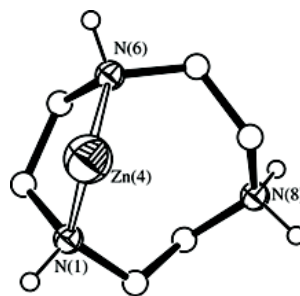

II

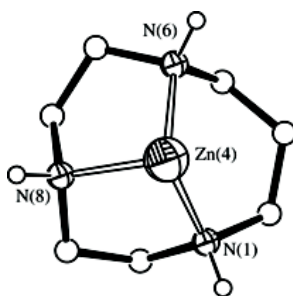

III

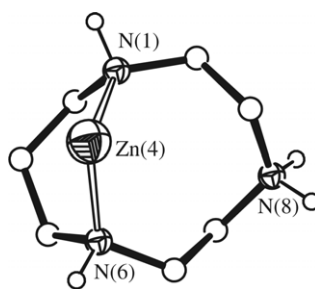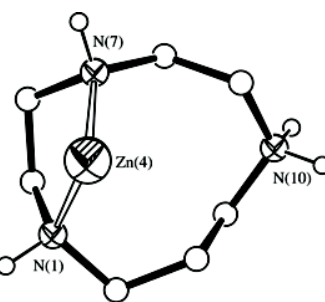

IV

V

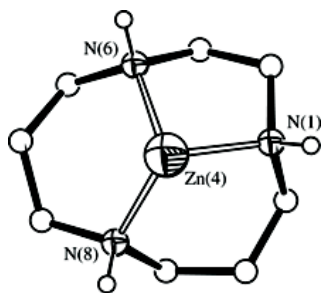

VI

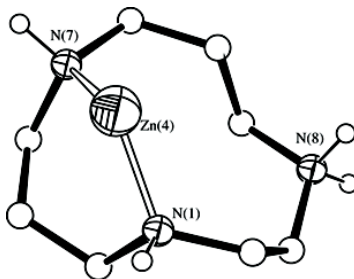

VII

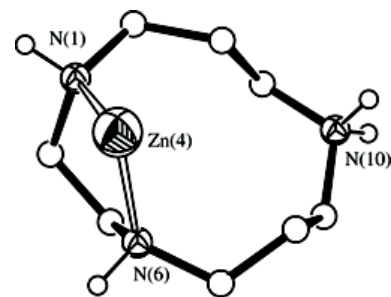

VIII

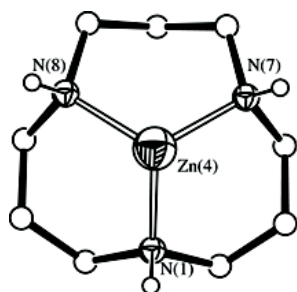

IX

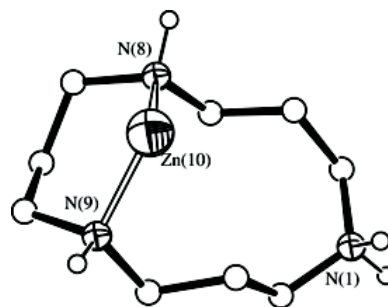

X

**Fig. S3:** The optimized structures for all  $[\text{ZnL}]^{2+}$  complexes and their protonated forms,  $[\text{ZnHL}]^{3+}$ , at B3lyp level of theory

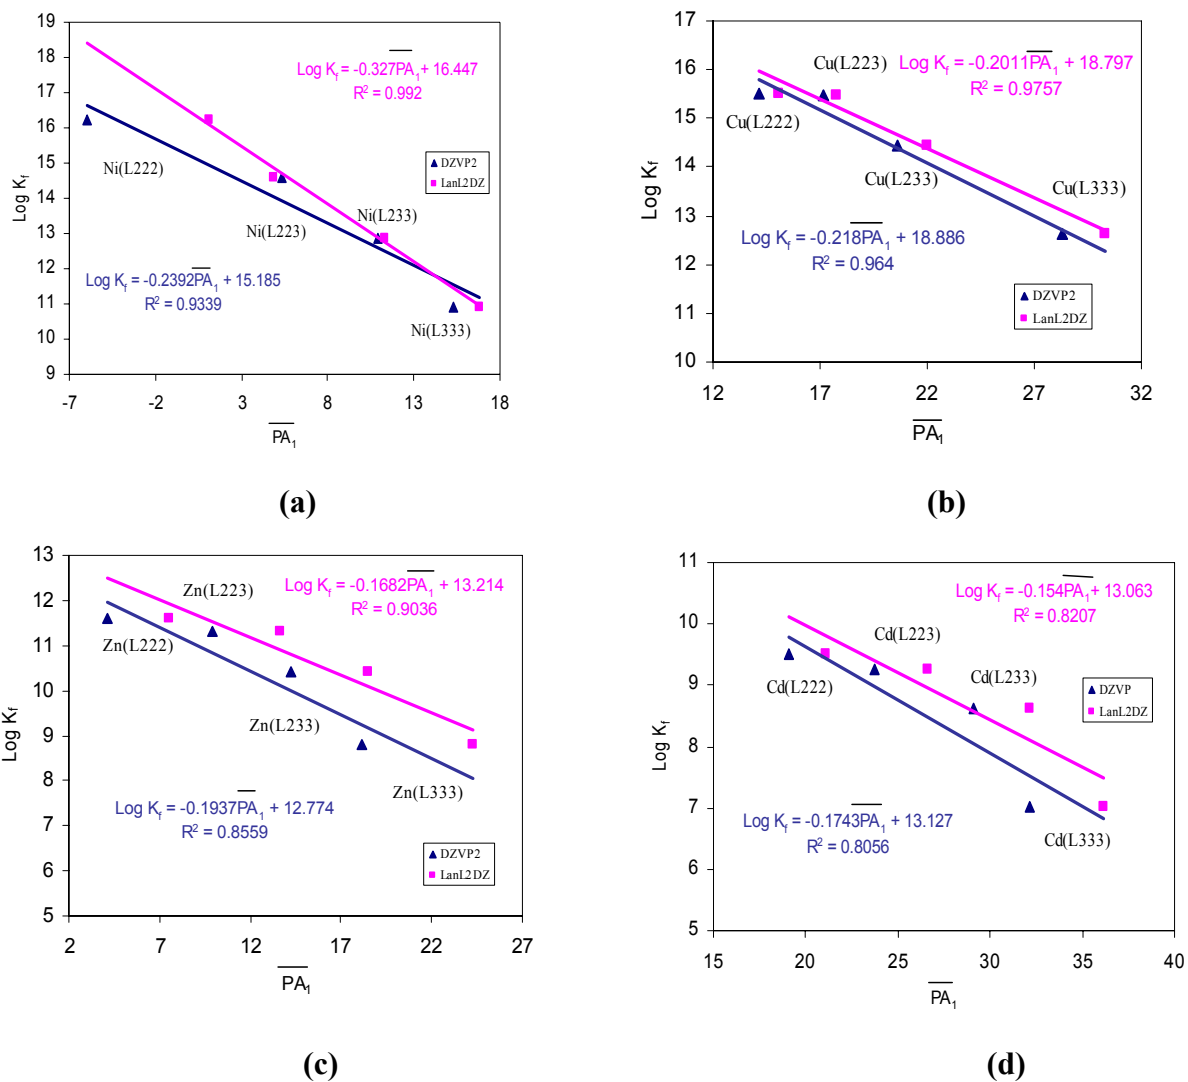

**Fig. S4:** Correlation of  $\text{Log } K_f$  vs. calculated  $\overline{PA}_1$  for the first protonation step of  $[\text{NiL}]^{2+}$ ,  $[\text{CuL}]^{2+}$ ,  $[\text{ZnL}]^{2+}$  and  $[\text{CdL}]^{2+}$  complexes, a, b, c and d, respectively, at B3LYP level of theory. The data are derived from Eq (2)

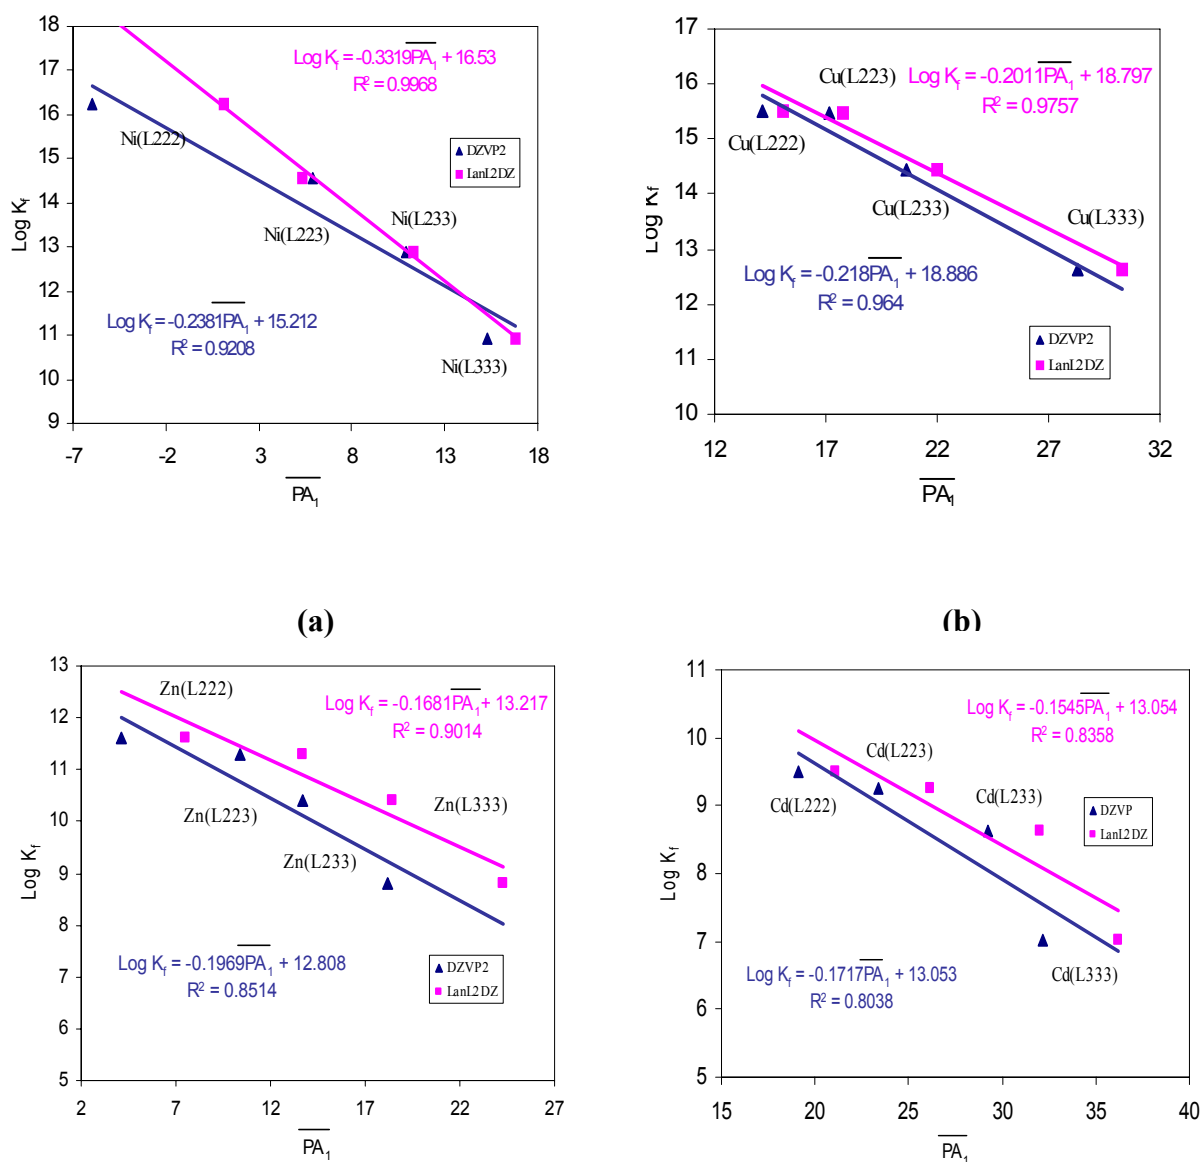

**Fig. S5:** Correlation of  $\text{Log } K_f$  vs. calculated  $\overline{PA}_1$  for the first protonation step of  $[\text{NiL}]^{2+}$ ,  $[\text{CuL}]^{2+}$ ,  $[\text{ZnL}]^{2+}$  and  $[\text{CdL}]^{2+}$  complexes, a, b, c and d, respectively, at B3LYP level of theory. The data are derived from Eq (3)



**Table S1:**

Calculated total energies (Hartree,  $ZPE + E_{el}$ ), zero point energies and  $E_{el}$  of the  $[ML]^{2+}$  complexes and their possible protonated forms at B3LYP level of theory with DZVP2(DZVP for  $Cd^{2+}$ )basis set<sup>a</sup>

| No.  |                         | Protonated site <sup>b</sup> | $ZPE$               | $E_0$                      | $E_{el}$                   |
|------|-------------------------|------------------------------|---------------------|----------------------------|----------------------------|
| I    | Ni(L222) <sup>2+</sup>  |                              | 0.229837 (0.230663) | -1909.303586 (-570.382982) | -1909.533423 (-570.613645) |
| II   | Ni(L222H) <sup>3+</sup> | 2,2                          | 0.241697 (0.242304) | -1909.294058 (-570.384772) | -1909.535755 (-570.627076) |
| III  | Ni(L223) <sup>2+</sup>  |                              | 0.258594 (0.259330) | -1948.617254 (-609.679196) | -1948.875848 (-609.938526) |
| IV   | Ni(L223H) <sup>3+</sup> | 2, 2                         | 0.269294 (0.270209) | -1948.627746 (-609.688881) | -1948.897040 (-609.959090) |
| V    | Ni(L223H) <sup>3+</sup> | 2, 3                         | 0.269779 (0.270581) | -1648.624680 (-609.685975) | -1948.894459 (-609.956556) |
| VI   | Ni(L233) <sup>2+</sup>  |                              | 0.286855 (0.287663) | -1987.925013 (-648.969471) | -1988.211868 (-649.257134) |
| VII  | Ni(L233H) <sup>3+</sup> | 2, 3                         | 0.298143 (0.298890) | -1987.942575 (-648.987528) | -1988.240718 (-649.286418) |
| VIII | Ni(L233H) <sup>3+</sup> | 3, 3                         | 0.298913 (0.299895) | -1987.942057 (-648.987602) | -1988.240970 (-649.287497) |
| IX   | Ni(L333) <sup>2+</sup>  |                              | 0.315850 (0.316704) | -2027.232676 (-688.259096) | -2027.548526 (-688.575800) |
| X    | Ni(L333H) <sup>3+</sup> | 3,3                          | 0.326977 (0.328326) | -2027.257052 (-688.285842) | -2027.584029 (-688.614168) |
| I    | Cu(L222) <sup>2+</sup>  |                              | 0.227910 (0.228787) | -2041.417219 (-597.189122) | -2041.645129 (-597.417909) |
| II   | Cu(L222H) <sup>3+</sup> | 2,2                          | 0.240713 (0.241213) | -2041.439748 (-597.213157) | -2041.680461 (-597.454370) |
| III  | Cu(L223) <sup>2+</sup>  |                              | 0.257038 (0.257880) | -2080.732488 (-636.487734) | -2080.989526 (-636.745614) |
| IV   | Cu(L223H) <sup>3+</sup> | 2, 2                         | 0.268958 (0.269558) | -2080.762645 (-636.518514) | -2081.031603 (-636.788072) |
| V    | Cu(L223H) <sup>3+</sup> | 2, 3                         | 0.268856 (0.269688) | -2080.758342 (-636.514798) | -2081.027198 (-636.784486) |
| VI   | Cu(L233) <sup>2+</sup>  |                              | 0.285495 (0.286313) | -2120.045359 (-675.782761) | -2120.330854 (-676.069074) |
| VII  | Cu(L233H) <sup>3+</sup> | 2, 3                         | 0.297366 (0.298187) | -2120.078399 (-675.817674) | -2120.375765 (-676.115861) |
| VIII | Cu(L233H) <sup>3+</sup> | 3, 3                         | 0.298513 (0.299198) | -2120.077801 (-675.817984) | -2120.376314 (-676.117182) |
| IX   | Cu(L333) <sup>2+</sup>  |                              | 0.314182 (0.315116) | -2159.357220 (-715.077320) | -2159.671402 (-715.392436) |
| X    | Cu(L333H) <sup>3+</sup> | 3,3                          | 0.327129 (0.328025) | -2159.402285 (-715.125612) | -2159.729414 (-715.453677) |
| I    | Zn(L222) <sup>2+</sup>  |                              | 0.229797 (0.230589) | -2180.326328 (-466.678514) | -2180.556125 (-466.909103) |
| II   | Zn(L222H) <sup>3+</sup> | 2,2                          | 0.241773 (0.242765) | -2180.332952 (-466.690546) | -2180.574725 (-466.933311) |
| III  | Zn(L223) <sup>2+</sup>  |                              | 0.258216 (0.259058) | -2219.638337 (-505.971009) | -2219.896553 (-506.230067) |
| IV   | Zn(L223H) <sup>3+</sup> | 2, 2                         | 0.269907 (0.270862) | -2219.656312 (-505.993006) | -2219.926219 (-506.263868) |
| V    | Zn(L223H) <sup>3+</sup> | 2, 3                         | 0.270240 (0.271464) | -2219.652985 (-505.992667) | -2219.923225 (-506.264131) |
| VI   | Zn(L233) <sup>2+</sup>  |                              | 0.286689 (0.287384) | -2258.950626 (-545.263218) | -2259.237315 (-545.550602) |
| VII  | Zn(L233H) <sup>3+</sup> | 2, 3                         | 0.298733 (0.299701) | -2258.974776 (-545.292559) | -2259.273509 (-545.592260) |
| VIII | Zn(L233H) <sup>3+</sup> | 3, 3                         | 0.299143 (0.300286) | -2258.970324 (-545.292779) | -2259.269467 (-545.593065) |
| IX   | Zn(L333) <sup>2+</sup>  |                              | 0.315832 (0.316343) | -2298.266143 (-584.558706) | -2298.581975 (-584.875049) |
| X    | Zn(L333H) <sup>3+</sup> | 3,3                          | 0.328118 (0.329488) | -2298.295082 (-584.597420) | -2298.623200 (-584.926908) |
| I    | Cd(L222) <sup>2+</sup>  |                              | 0.229261 (0.229730) | -5868.074573 (-449.127650) | -5868.303834 (-449.357380) |
| II   | Cd(L222H) <sup>3+</sup> | 2,2                          | 0.241766 (0.242192) | -5868.105039 (-449.161224) | -5868.396805 (-449.403416) |
| III  | Cd(L223) <sup>2+</sup>  |                              | 0.257569 (0.257942) | -5907.374947 (-488.417924) | -5907.632516 (-488.675866) |
| IV   | Cd(L223H) <sup>3+</sup> | 2, 2                         | 0.269923 (0.270274) | -5907.411048 (-488.458579) | -5907.680971 (-488.728853) |
| V    | Cd(L223H) <sup>3+</sup> | 2, 3                         | 0.270381 (0.270852) | -5907.413536 (-488.461204) | -5907.683917 (-488.732056) |
| VI   | Cd(L233) <sup>2+</sup>  |                              | 0.286061 (0.286354) | -5946.673554 (-527.706328) | -5946.959615 (-527.992682) |
| VII  | Cd(L233H) <sup>3+</sup> | 2, 3                         | 0.298749 (0.299161) | -5946.717779 (-527.755736) | -5947.016528 (-528.054897) |
| VIII | Cd(L233H) <sup>3+</sup> | 3, 3                         | 0.299402 (0.299930) | -5946.724096 (-527.761251) | -5947.023498 (-528.061181) |
| IX   | Cd(L333) <sup>2+</sup>  |                              | 0.314794 (0.315042) | -5985.975877 (-566.997673) | -5986.290671 (-567.312715) |
| X    | Cd(L333H) <sup>3+</sup> | 3,3                          | 0.328517 (0.328778) | -5986.027086 (-567.055322) | -5986.355603 (-567.384100) |

<sup>a</sup> The data obtained at the LanL2DZ are given in parentheses.

<sup>b</sup> The 2,2; 2,3 or 3,3 are correspond to a secondary amine located between two ethylene arms, one ethylene and one propylene arm or two propylene arms, respectively.

**Corresponding Formula used here for calculation of gas phase macrobasicities:**

$$\overline{\Delta G_1} = \frac{\sum_{i=1}^m \Delta G_i \times S_i}{\sum_{i=1}^m S_i} \quad (\text{eq S1})$$

$$\overline{\Delta G_1} = \frac{\sum_{i=1}^m \Delta G_i \times X_i}{\sum_{i=1}^m X_i} \quad (\text{eq S2})$$

$$\overline{\Delta G_1} = \frac{\sum_{i=1}^m \Delta G_i \times S_i \times X_i}{\sum_{i=1}^m S_i \times X_i} \quad (\text{eq S3})$$

Where  $\Delta G_i$  is on of the microbasicities in first protonation step of a polybasic compound and defined as the negative of the Gibbs free energy difference (sum of electronic and thermal free energies) between the initial compound and its  $i^{\text{th}}$  protonated form. The  $S_i$  is the available identical sites to undergo protonation and the  $x_i$  is population of each species and both are defined in the text

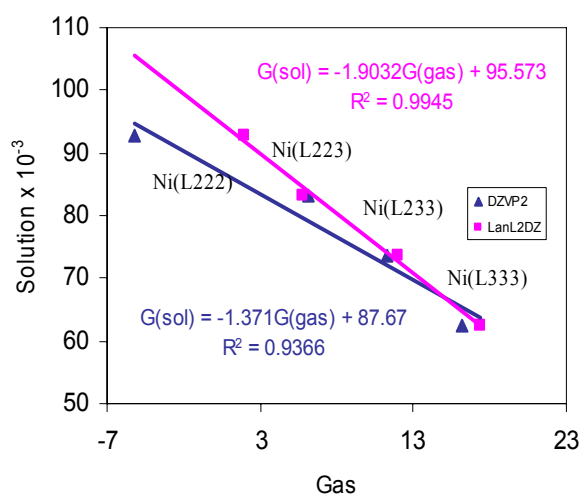

(a)

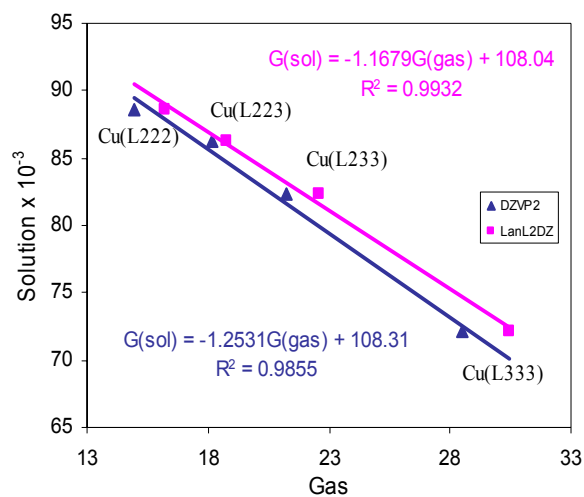

(b)

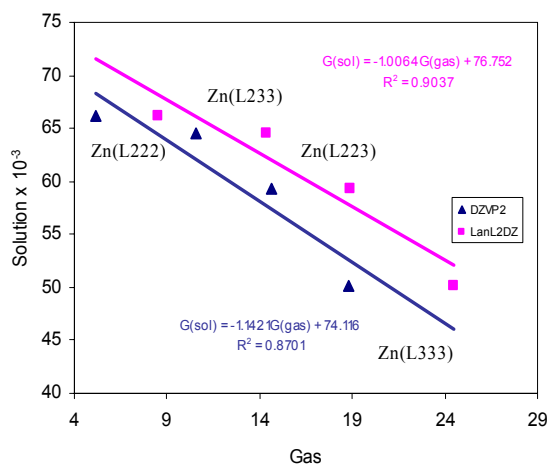

(c)

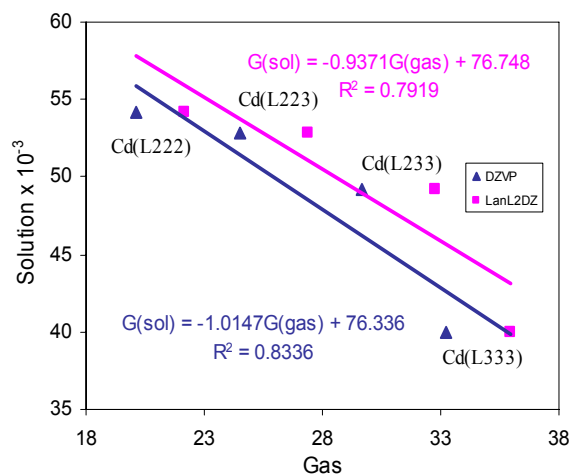

(d)

**Fig. S6:** Correlation of measured  $G$  in solution vs. calculated  $G$  in the gas phase for the first protonation step of  $[\text{NiL}]^{2+}$ ,  $[\text{CuL}]^{2+}$ ,  $[\text{ZnL}]^{2+}$  and  $[\text{CdL}]^{2+}$  complexes, a, b, c and d, respectively, at the B3LYP level of theory using both the LanL2DZ and DZVP2 (DZVP for  $\text{Cd}^{2+}$ ) basis sets. The data are derived from Eq (S1)

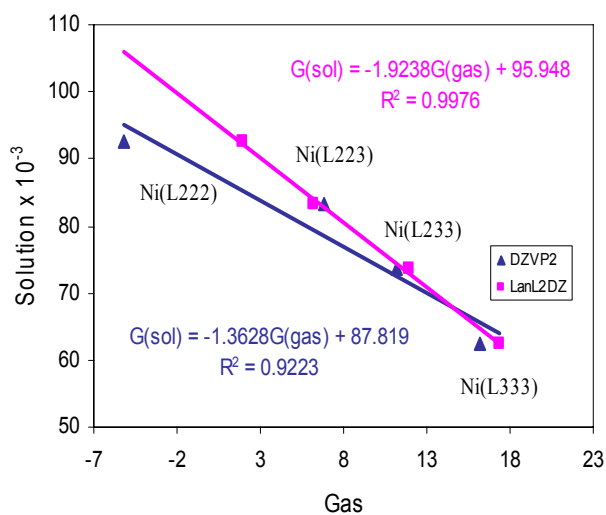

(a)

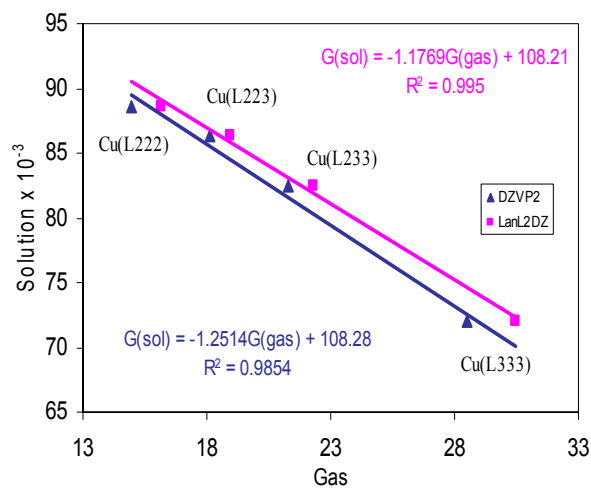

(b)

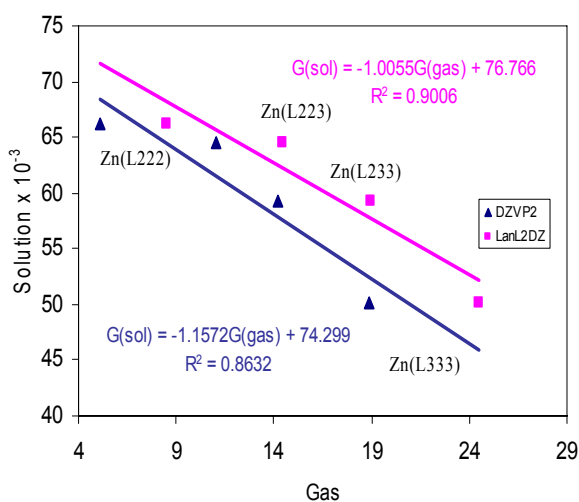

(c)

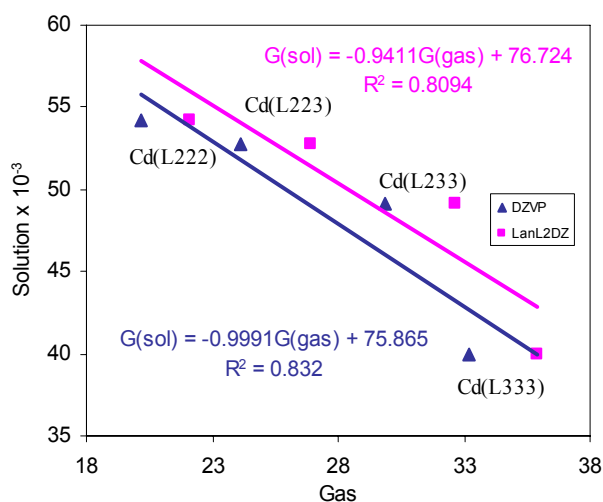

(d)

**Fig. S7:** Correlation of measured  $G$  in solution vs. calculated  $G$  in the gas phase for the first protonation step of  $[\text{NiL}]^{2+}$ ,  $[\text{CuL}]^{2+}$ ,  $[\text{ZnL}]^{2+}$  and  $[\text{CdL}]^{2+}$  complexes, a, b, c and d, respectively, at the B3LYP level of theory using both the LanL2DZ and DZVP2 (DZVP for  $\text{Cd}^{2+}$ ) basis sets. The data are derived from Eq (S2)

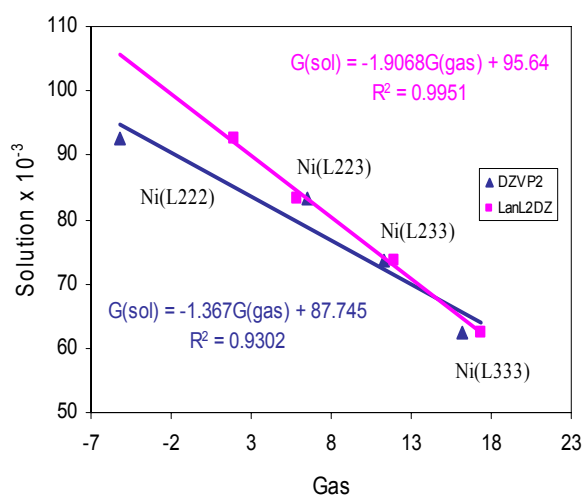

(a)

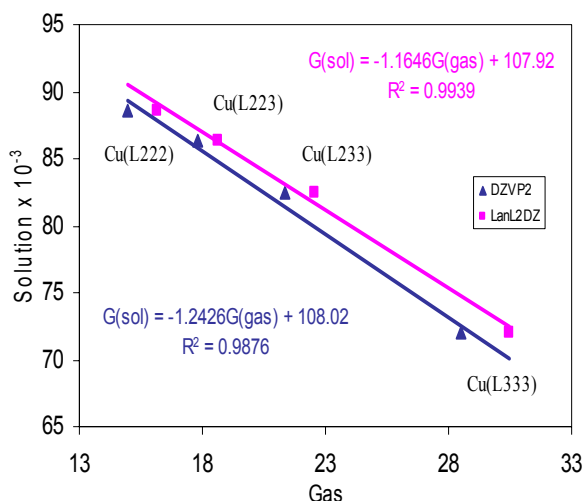

(b)

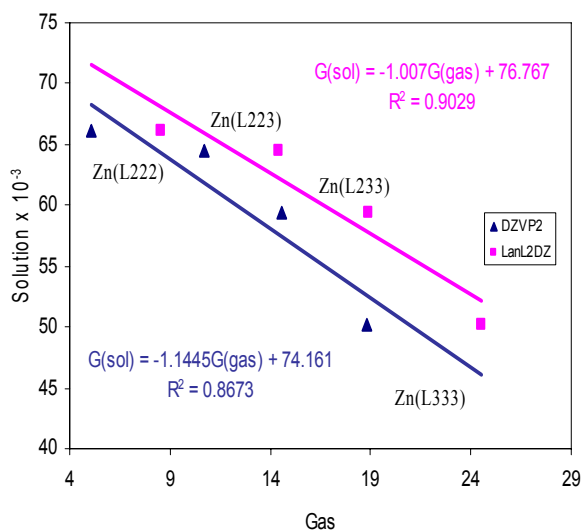

(c)

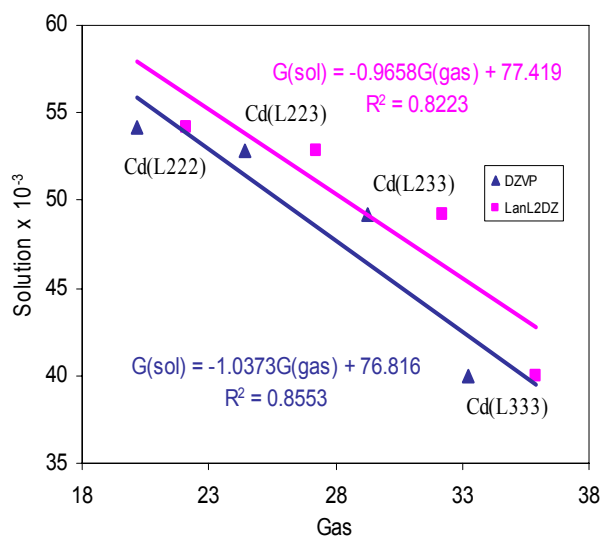

(d)

**Fig. S8:** Correlation of measured  $G$  in solution vs. calculated  $G$  in the gas phase for the first protonation step of  $[\text{NiL}]^{2+}$ ,  $[\text{CuL}]^{2+}$ ,  $[\text{ZnL}]^{2+}$  and  $[\text{CdL}]^{2+}$  complexes, a, b, c and d, respectively, at the B3LYP level of theory using both the LanL2DZ and DZVP2 (DZVP for  $\text{Cd}^{2+}$ ) basis sets. The data are derived from Eq (S3)

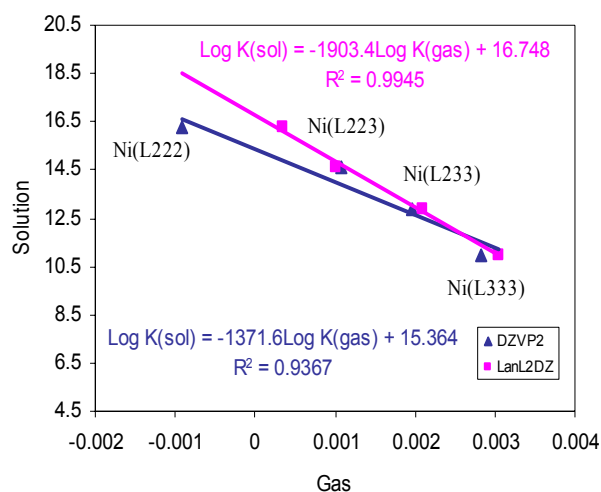

(a)

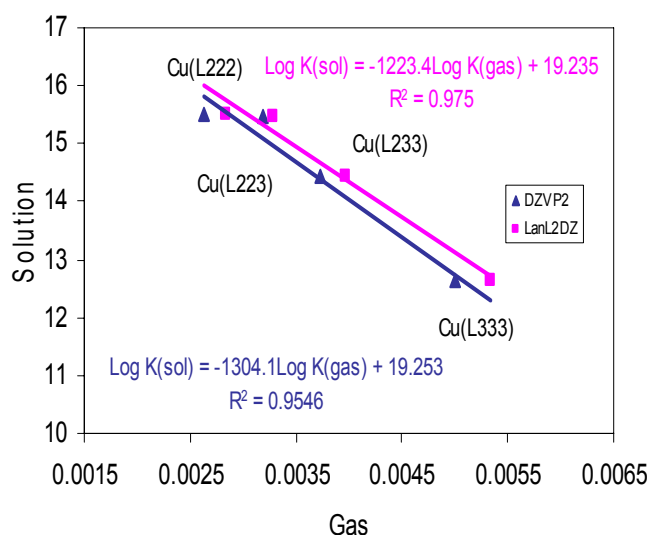

(b)

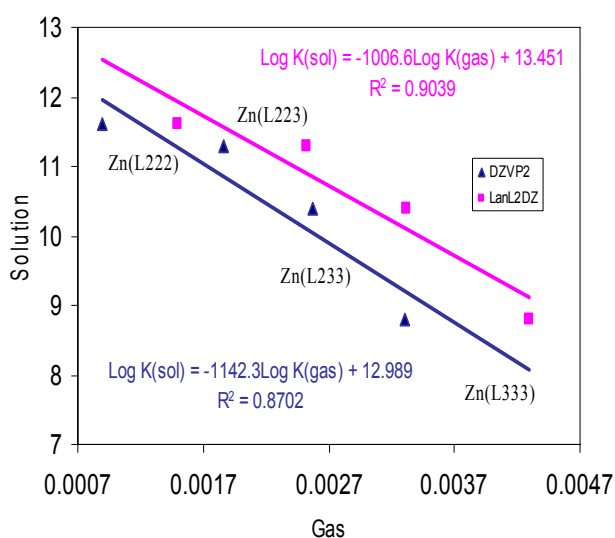

(c)

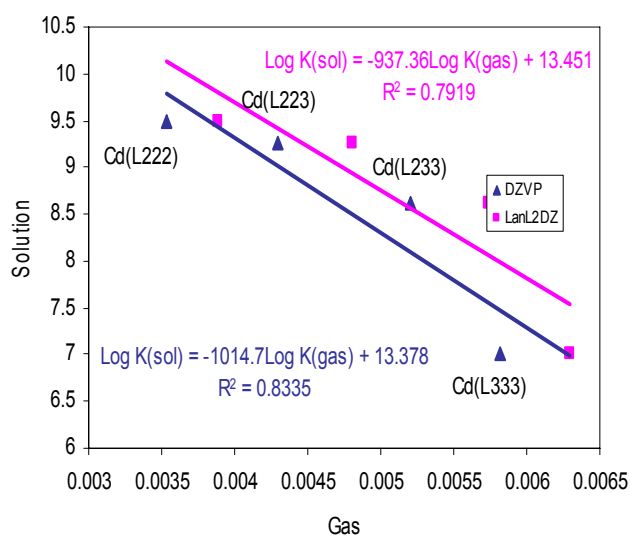

(d)

**Fig. S9:** Correlation of measured  $\text{Log } K$  in solution vs. calculated  $\text{Log } K$  in the gas phase for the first protonation step of  $[\text{NiL}]^{2+}$ ,  $[\text{CuL}]^{2+}$ ,  $[\text{ZnL}]^{2+}$  and  $[\text{CdL}]^{2+}$  complexes, a, b, c and d, respectively, at the B3LYP level of theory using both the LanL2DZ and DZVP2 (DZVP for  $\text{Cd}^{2+}$ ) basis sets. The  $K$  values for the gas phase were calculated from the equation  $\Delta G = -RTL \ln K$ , where the  $G$  values derived from Eq (S1)

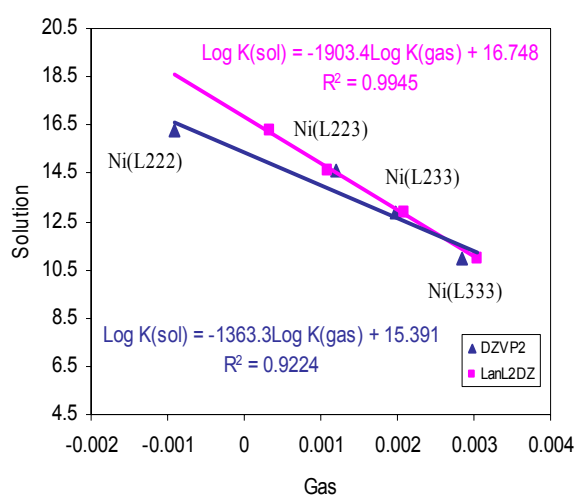

(a)

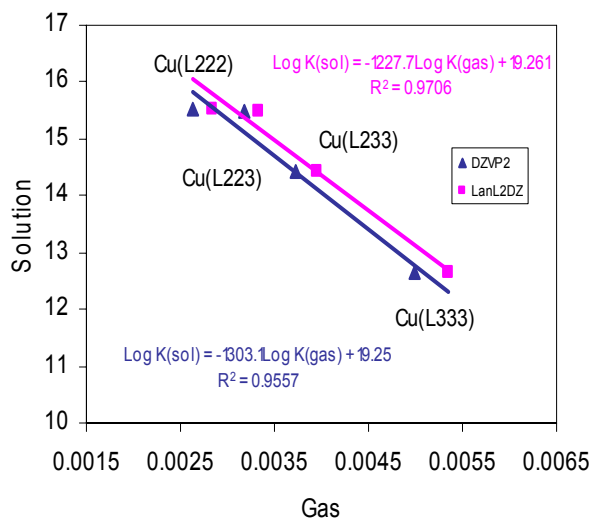

(b)

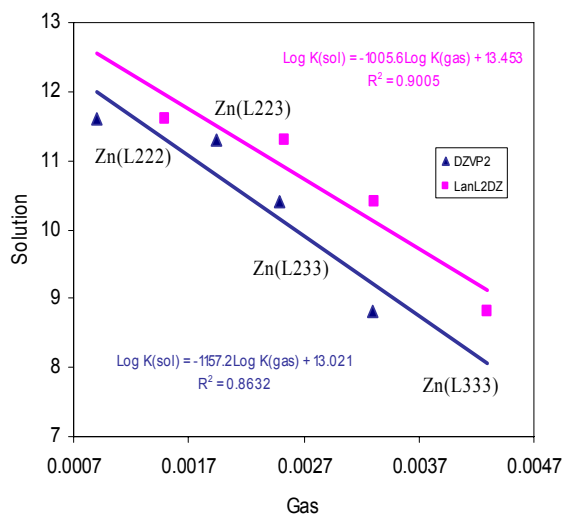

(c)

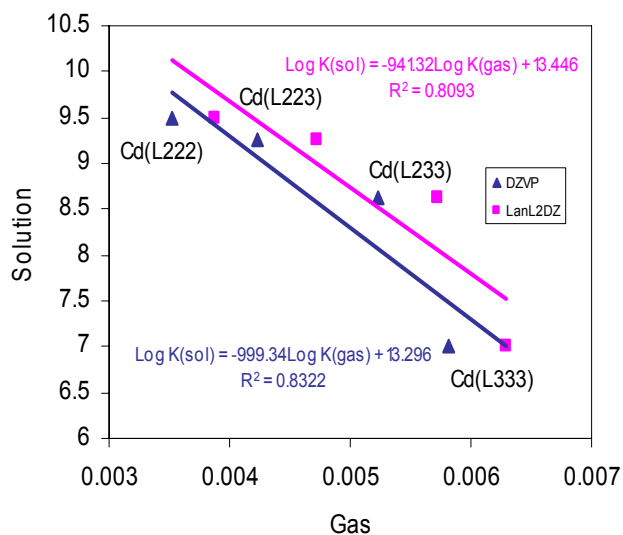

(d)

**Fig. S10:** Correlation of measured  $\text{Log } K$  in solution vs. calculated  $\text{Log } K$  in the gas phase for the first protonation step of  $[\text{NiL}]^{2+}$ ,  $[\text{CuL}]^{2+}$ ,  $[\text{ZnL}]^{2+}$  and  $[\text{CdL}]^{2+}$  complexes, a, b, c and d, respectively, at the B3LYP level of theory using both the LanL2DZ and DZVP2 (DZVP for  $\text{Cd}^{2+}$ ) basis sets. The  $K$  values for the gas phase were calculated from the equation  $\Delta G = -RTL \ln K$ , where the  $G$  values derived from Eq (S2)

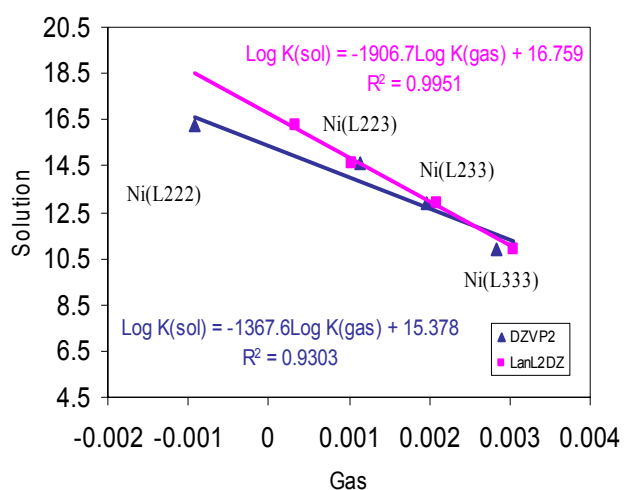

(a)

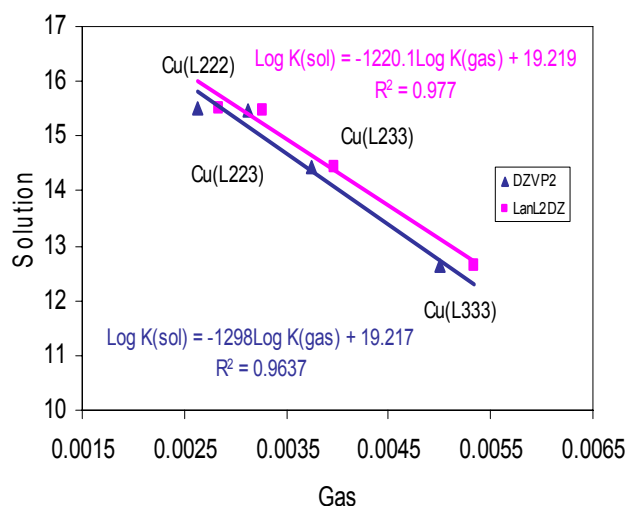

(b)

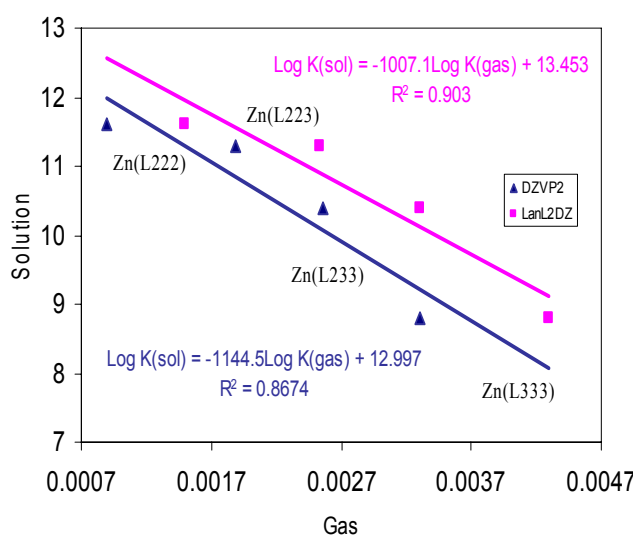

(c)

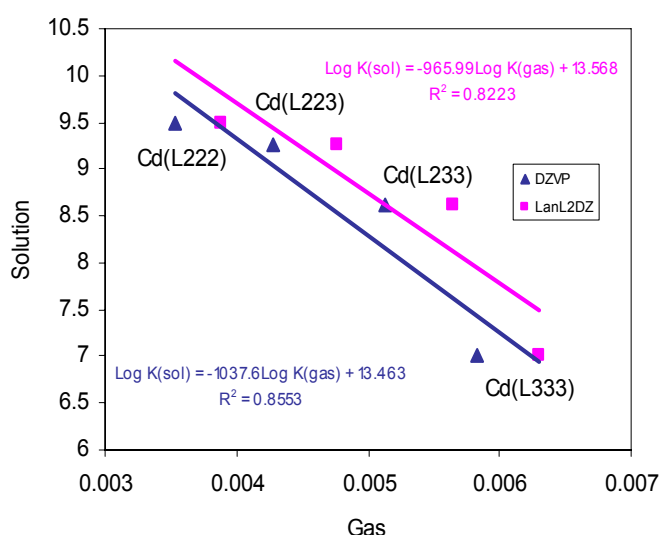

(d)

**Fig. S11:** Correlation of measured  $\text{Log } K$  in solution vs. calculated  $\text{Log } K$  in the gas phase for the first protonation step of  $[\text{NiL}]^{2+}$ ,  $[\text{CuL}]^{2+}$ ,  $[\text{ZnL}]^{2+}$  and  $[\text{CdL}]^{2+}$  complexes, a, b, c and d, respectively, at the B3LYP level of theory using both the LanL2DZ and DZVP2 (DZVP for  $\text{Cd}^{2+}$ ) basis sets. The  $K$  values for the gas phase were calculated from the equation  $\Delta G = -RT \ln K$ , where the  $G$  values derived from Eq (S2)



**Table S2:**

Calculated microbasicities,  $-\Delta G_i$ , of the  $[ML]^{2+}$  complexes at B3LYP level of theory using DZVP2 in the case of  $[\text{NiL}]^{2+}$ ,  $[\text{CuL}]^{2+}$  and  $[\text{ZnL}]^{2+}$  complexes and DZVP for  $[\text{CdL}]^{2+}$  complexes.<sup>a</sup>

| No.  |                                | Protonated site <sup>b</sup> | $-\Delta G$ | No.  |                                | Protonated site <sup>b</sup> | $-\Delta G$ |
|------|--------------------------------|------------------------------|-------------|------|--------------------------------|------------------------------|-------------|
| I    | $\text{Ni}(\text{L222})^{2+}$  |                              |             | I    | $\text{Zn}(\text{L222})^{2+}$  |                              |             |
| II   | $\text{Ni}(\text{L222H})^{3+}$ | 2,2                          | -5.2 (1.9)  | II   | $\text{Zn}(\text{L222H})^{3+}$ | 2,2                          | 5.1 (8.5)   |
| III  | $\text{Ni}(\text{L223})^{2+}$  |                              |             | III  | $\text{Zn}(\text{L223})^{2+}$  |                              |             |
| IV   | $\text{Ni}(\text{L223H})^{3+}$ | 2, 2                         | 7.5 (7.0)   | IV   | $\text{Zn}(\text{L223H})^{3+}$ | 2, 2                         | 12.0 (14.6) |
| V    | $\text{Ni}(\text{L223H})^{3+}$ | 2, 3                         | 5.5 (5.2)   | V    | $\text{Zn}(\text{L223H})^{3+}$ | 2, 3                         | 9.9 (14.3)  |
| VI   | $\text{Ni}(\text{L233})^{2+}$  |                              |             | VI   | $\text{Zn}(\text{L233})^{2+}$  |                              |             |
| VII  | $\text{Ni}(\text{L233H})^{3+}$ | 2, 3                         | 11.3 (12.0) | VII  | $\text{Zn}(\text{L233H})^{3+}$ | 2, 3                         | 15.5 (18.8) |
| VIII | $\text{Ni}(\text{L233H})^{3+}$ | 3, 3                         | 11.1 (11.9) | VIII | $\text{Zn}(\text{L233H})^{3+}$ | 3, 3                         | 13.0 (19.1) |
| IX   | $\text{Ni}(\text{L333})^{2+}$  |                              |             | IX   | $\text{Zn}(\text{L333})^{2+}$  |                              |             |
| X    | $\text{Ni}(\text{L333H})^{3+}$ | 3,3                          | 16.2 (17.4) | X    | $\text{Zn}(\text{L333H})^{3+}$ | 3,3                          | 18.8 (24.5) |
| I    | $\text{Cu}(\text{L222})^{2+}$  |                              |             | I    | $\text{Cd}(\text{L222})^{2+}$  |                              |             |
| II   | $\text{Cu}(\text{L222H})^{3+}$ | 2,2                          | 15.0 (16.2) | II   | $\text{Cd}(\text{L222H})^{3+}$ | 2,2                          | 20.1 (22.1) |
| III  | $\text{Cu}(\text{L223})^{2+}$  |                              |             | III  | $\text{Cd}(\text{L223})^{2+}$  |                              |             |
| IV   | $\text{Cu}(\text{L223H})^{3+}$ | 2, 2                         | 19.7 (20.1) | IV   | $\text{Cd}(\text{L223H})^{3+}$ | 2, 2                         | 23.4 (26.2) |
| V    | $\text{Cu}(\text{L223H})^{3+}$ | 2, 3                         | 17.4 (18.0) | V    | $\text{Cd}(\text{L223H})^{3+}$ | 2, 3                         | 25.1 (28.0) |
| VI   | $\text{Cu}(\text{L233})^{2+}$  |                              |             | VI   | $\text{Cd}(\text{L233})^{2+}$  |                              |             |
| VII  | $\text{Cu}(\text{L233H})^{3+}$ | 2, 3                         | 21.4 (22.5) | VII  | $\text{Cd}(\text{L233H})^{3+}$ | 2, 3                         | 28.3 (31.6) |
| VIII | $\text{Cu}(\text{L233H})^{3+}$ | 3, 3                         | 21.0 (22.8) | VIII | $\text{Cd}(\text{L233H})^{3+}$ | 3, 3                         | 32.4 (35.0) |
| IX   | $\text{Cu}(\text{L333})^{2+}$  |                              |             | IX   | $\text{Cd}(\text{L333})^{2+}$  |                              |             |
| X    | $\text{Cu}(\text{L333H})^{3+}$ | 3,3                          | 28.5 (30.5) | X    | $\text{Cd}(\text{L333H})^{3+}$ | 3,3                          | 33.2 (35.9) |

<sup>a</sup> The data in parentheses are calculated using LanL2DZ basis set.

<sup>b</sup> The 2,2; 2,3 or 3,3 are correspond to a secondary amine located between two ethylene arms, one ethylene and one propylene arm or two propylene arms, respectively.

**Table S3:**

Comparison between the experimental  $\Delta G$  values for formation of  $[\text{ML}]^{2+}$  complexes and calculated first macrobasicities at B3LYP level of theory using DZVP2 in the case of  $[\text{NiL}]^{2+}$ ,  $[\text{CuL}]^{2+}$  and  $[\text{ZnL}]^{2+}$  complexes and DZVP for  $[\text{CdL}]^{2+}$  complexes<sup>a</sup>

|      | $\Delta G(\text{sol}) \times 10^{-3}$ |       |       |       | $\overline{\Delta G_1}(\text{gas})$                     |                                                         |                                                         |                                                         |
|------|---------------------------------------|-------|-------|-------|---------------------------------------------------------|---------------------------------------------------------|---------------------------------------------------------|---------------------------------------------------------|
|      | Ni                                    | Cu    | Zn    | Cd    | Ni                                                      | Cu                                                      | Zn                                                      | Cd                                                      |
| L222 | 92.66                                 | 88.56 | 66.19 | 54.20 | <b>-5.2 (1.9)</b> <sup>c,d</sup>                        | <b>15.0 (16.2)</b>                                      | <b>5.1 (8.5)</b>                                        | <b>20.1 (22.1)</b>                                      |
| L223 | 83.19                                 | 86.33 | 64.48 | 52.78 | <b>6.2 (5.8)</b><br>6.8 (6.2)<br><i>6.58 (5.9)</i>      | <b>18.2 (18.8)</b><br>18.1 (19.0)<br><i>17.8 (18.6)</i> | <b>10.6 (14.4)</b><br>11.1 (14.5)<br><i>10.7 (14.4)</i> | <b>24.5 (27.4)</b><br>24.1 (26.9)<br><i>24.4 (27.2)</i> |
| L233 | 73.49                                 | 82.39 | 59.34 | 49.18 | <b>11.2 (11.9)</b><br>11.2 (11.9)<br><i>11.3 (11.9)</i> | <b>21.2 (22.6)</b><br>21.3 (22.6)<br><i>21.3 (22.6)</i> | <b>14.7 (18.9)</b><br>14.2 (18.9)<br><i>14.6 (18.9)</i> | <b>29.7 (32.8)</b><br>29.9 (32.6)<br><i>29.3 (32.2)</i> |
| L333 | 62.36                                 | 72.06 | 50.21 | 40.00 | <b>16.2 (17.4)</b>                                      | <b>28.5 (30.5)</b>                                      | <b>18.8 (24.5)</b>                                      | <b>33.2 (35.9)</b>                                      |

<sup>a</sup> The data in parentheses are calculated using LanL2DZ basis set

<sup>b</sup> The experimental Kf values reported in Ref [5c] were put in equation  $G = -\text{RTLnK}$  to calculate the experimental  $\Delta G$  values

<sup>c</sup> The data were derived from Eq (S1) are given as bold, those were derived with Eq(S2) are in plain text and those were derived from Eq(S3) are in italic.

<sup>d</sup> Note that for the symmetrical complexes ( $[\text{ML222}]^{2+}$  and  $[\text{ML333}]^{2+}$ ) there is only one microbasicity and the data derived from the eqs. (1), (2) and (3) are all equal ( $G_i = \overline{\Delta G_1}$ )

**Table S4:**

Comparison between calculated protonation macroconstants of  $[ML]^{2+}$  complexes calculated at B3LYP level of theory using DZVP2 in the case of  $[NiL]^{2+}$ ,  $[CuL]^{2+}$  and  $[ZnL]^{2+}$  complexes and DZVP for  $[CdL]^{2+}$  complexes<sup>a</sup> and their measured G in solution.

|      | Log $K_f$ (sol) |       |      |      | $Log K(gas) \times 10^3$         |                  |                  |                  |
|------|-----------------|-------|------|------|----------------------------------|------------------|------------------|------------------|
|      | Ni              | Cu    | Zn   | Cd   | Ni                               | Cu               | Zn               | Cd               |
| L222 | 16.24           | 15.52 | 11.6 | 9.5  | <b>-0.9 (0.3)</b> <sup>c,d</sup> | <b>2.6 (2.8)</b> | <b>0.9 (1.5)</b> | <b>3.5 (3.9)</b> |
| L223 | 14.58           | 15.48 | 11.3 | 9.25 | <b>1.1 (1.0)</b>                 | <b>3.2 (3.3)</b> | <b>1.8 (2.5)</b> | <b>4.3 (4.8)</b> |
|      |                 |       |      |      | 1.2 (1.1)                        | 3.2 (3.3)        | 1.9 (2.5)        | 4.2 (4.7)        |
|      |                 |       |      |      | <i>1.1 (1.0)</i>                 | <i>3.1 (3.3)</i> | <i>1.9 (2.5)</i> | <i>4.3 (4.8)</i> |
| L233 | 12.88           | 14.44 | 10.4 | 8.62 | <b>2.0 (2.1)</b>                 | <b>3.7 (4.0)</b> | <b>2.6 (3.3)</b> | <b>5.2 (5.7)</b> |
|      |                 |       |      |      | 2.0 (2.1)                        | 3.7 (4.0)        | 2.5 (3.3)        | 5.2 (5.7)        |
|      |                 |       |      |      | <i>2.0 (2.1)</i>                 | <i>3.7 (4.0)</i> | <i>2.6 (3.3)</i> | <i>5.1 (5.6)</i> |
| L333 | 10.93           | 12.63 | 8.8  | 7.01 | <b>2.8 (3.0)</b>                 | <b>5.0 (5.3)</b> | <b>3.3 (4.3)</b> | <b>5.8 (6.3)</b> |

<sup>a</sup> The data in parentheses are calculated using LanL2DZ basis set

<sup>b</sup> The experimental value were derived from Ref [5c].

<sup>c</sup> The data were derived from Eq (S1) are given as bold, those were derived with Eq(S2) are in plain text and those were derived from Eq(S3) are in italic.

<sup>d</sup> Note that for the symmetrical complexes ( $[ML222]^{2+}$  and  $[ML333]^{2+}$ ) there is only one microbasicity and the data derived from the eqs. (1), (2) and (3) are all equal ( $G_i = \overline{\Delta G}_i$ )

**Table S5:**

Calculated Gibbs free energies,  $G$ , *Thermal correction to Gibbs Free Energy*,  $G_{corr}$ , and Maxwell-Boltzmann distribution,  $X_i$ , for  $[\text{NiL}]^{2+}$ ,  $[\text{CuL}]^{2+}$ ,  $[\text{ZnL}]^{2+}$  and  $[\text{CdL}]^{2+}$  complexes and their possible protonated forms at B3LYP level of theory using DZVP2 basis set for  $\text{Ni}^{2+}$ ,  $\text{Cu}^{2+}$  and  $\text{Zn}^{2+}$  and DZVP for  $\text{Cd}^{2+}$ .<sup>a</sup>

| No.  |                         | Protonated site <sup>b</sup> | $G$ (Hartree)              | $G_{corr}$ (Hartree) | $G_{corr}$ (KJ/mol) | $X_i$              |
|------|-------------------------|------------------------------|----------------------------|----------------------|---------------------|--------------------|
| I    | Ni(L222) <sup>2+</sup>  |                              | -1909.338749 (-570.418182) | 0.194674 (0.195463)  | 510.6 (512.6)       |                    |
| II   | Ni(L222H) <sup>3+</sup> | 2,2                          | -1909.330420 (-570.421252) | 0.205335 (0.205824)  | 538.5 (539.8)       | 1 (1) <sup>b</sup> |
| III  | Ni(L223) <sup>2+</sup>  |                              | -1948.653575 (-609.715523) | 0.222273 (0.223003)  | 583.0 (584.9)       |                    |
| IV   | Ni(L223H) <sup>3+</sup> | 2, 2                         | -1948.665555 (-609.726743) | 0.231485 (0.232347)  | 607.1 (609.4)       | 0.64402 (0.60955)  |
| V    | Ni(L223H) <sup>3+</sup> | 2, 3                         | -1948.662415 (-609.723788) | 0.232045 (0.232768)  | 608.6 (610.5)       | 0.35597 (0.39044)  |
| VI   | Ni(L233) <sup>2+</sup>  |                              | -1987.963818 (-649.008086) | 0.248050 (0.249049)  | 650.6 (653.2)       |                    |
| VII  | Ni(L233H) <sup>3+</sup> | 2, 3                         | -1987.981835 (-649.027136) | 0.258883 (0.259282)  | 679.0 (680.0)       | 0.64572 (0.76489)  |
| VIII | Ni(L233H) <sup>3+</sup> | 3, 3                         | -1987.981521 (-649.027100) | 0.259450 (0.260397)  | 680.5 (683.0)       | 0.35427 (0.23510)  |
| IX   | Ni(L333) <sup>2+</sup>  |                              | -2027.272657 (-688.299232) | 0.275868 (0.276568)  | 723.5 (725.4)       |                    |
| X    | Ni(L333H) <sup>3+</sup> | 3,3                          | -2027.298459 (-688.326955) | 0.285570 (0.287212)  | 749.0 (753.3)       | 1 (1)              |
| I    | Cu(L222) <sup>2+</sup>  |                              | -2041.452448 (-597.224129) | 0.192682 (0.193781)  | 505.4 (508.2)       |                    |
| II   | Cu(L222H) <sup>3+</sup> | 2,2                          | -2041.476326 (-597.249927) | 0.204135 (0.204444)  | 535.4 (536.2)       | 1 (1)              |
| III  | Cu(L223) <sup>2+</sup>  |                              | -2080.768859 (-636.524035) | 0.220667 (0.221579)  | 578.8 (581.1)       |                    |
| IV   | Cu(L223H) <sup>3+</sup> | 2, 2                         | -2080.800235 (-636.556130) | 0.231368 (0.231943)  | 606.8 (608.3)       | 0.31617 (0.43035)  |
| V    | Cu(L223H) <sup>3+</sup> | 2, 3                         | -2080.796559 (-636.552808) | 0.230639 (0.231678)  | 604.9 (607.6)       | 0.68382 (0.56964)  |
| VI   | Cu(L233) <sup>2+</sup>  |                              | -2120.083734 (-675.821112) | 0.247120 (0.247962)  | 648.1 (650.4)       |                    |
| VII  | Cu(L233H) <sup>3+</sup> | 2, 3                         | -2120.117826 (-675.857013) | 0.257939 (0.258849)  | 676.5 (678.9)       | 0.78125 (0.72581)  |
| VIII | Cu(L233H) <sup>3+</sup> | 3, 3                         | -2120.117172 (-675.857413) | 0.259142 (0.259769)  | 679.7 (681.3)       | 0.21874 (0.27418)  |
| IX   | Cu(L333) <sup>2+</sup>  |                              | -2159.397134 (-715.117255) | 0.274269 (0.275182)  | 719.4 (721.7)       |                    |
| X    | Cu(L333H) <sup>3+</sup> | 3,3                          | -2159.442569 (-715.165825) | 0.286845 (0.287812)  | 752.3 (754.9)       | 1 (1)              |
| I    | Zn(L222) <sup>2+</sup>  |                              | -2180.360171 (-466.712390) | 0.195953 (0.196713)  | 513.9 (515.9)       |                    |
| II   | Zn(L222H) <sup>3+</sup> | 2,2                          | -2180.368312 (-466.725991) | 0.206413 (0.207321)  | 541.4 (543.8)       | 1 (1)              |
| III  | Zn(L223) <sup>2+</sup>  |                              | -2219.673908 (-506.006550) | 0.222644 (0.223517)  | 583.9 (586.2)       |                    |
| IV   | Zn(L223H) <sup>3+</sup> | 2, 2                         | -2219.692971 (-506.029756) | 0.233248 (0.234112)  | 611.8 (614.0)       | 0.56731 (0.67087)  |
| V    | Zn(L223H) <sup>3+</sup> | 2, 3                         | -2219.689722 (-506.029347) | 0.233504 (0.234785)  | 612.4 (615.8)       | 0.43268 (0.32912)  |
| VI   | Zn(L233) <sup>2+</sup>  |                              | -2258.988461 (-545.301113) | 0.248853 (0.249488)  | 652.7 (654.4)       |                    |
| VII  | Zn(L233H) <sup>3+</sup> | 2, 3                         | -2259.013154 (-545.331074) | 0.260355 (0.261186)  | 682.9 (685.0)       | 0.46856 (0.57482)  |
| VIII | Zn(L233H) <sup>3+</sup> | 3, 3                         | -2259.009232 (-545.331594) | 0.260236 (0.261471)  | 682.5 (685.8)       | 0.53143 (0.42517)  |
| IX   | Zn(L333) <sup>2+</sup>  |                              | -2298.304961 (-584.597906) | 0.277014 (0.277143)  | 726.6 (726.9)       |                    |
| X    | Zn(L333H) <sup>3+</sup> | 3,3                          | -2298.334997 (-584.636976) | 0.288202 (0.289932)  | 755.9 (760.4)       | 1 (1)              |
| I    | Cd(L222) <sup>2+</sup>  |                              | -5868.109393 (-449.162457) | 0.194441 (0.194924)  | 510.0 (511.2)       |                    |
| II   | Cd(L222H) <sup>3+</sup> | 2,2                          | -5868.141494 (-449.197749) | 0.205311 (0.205667)  | 538.5 (539.4)       | 1 (1)              |
| III  | Cd(L223) <sup>2+</sup>  |                              | -5907.411373 (-488.454420) | 0.221142 (0.221446)  | 580.0 (580.8)       |                    |
| IV   | Cd(L223H) <sup>3+</sup> | 2, 2                         | -5907.448610 (-488.496254) | 0.232362 (0.232600)  | 609.4 (610.1)       | 0.55166 (0.61333)  |
| V    | Cd(L223H) <sup>3+</sup> | 2, 3                         | -5907.451360 (-488.499020) | 0.232558 (0.233036)  | 609.9 (611.2)       | 0.44833 (0.38666)  |
| VI   | Cd(L233) <sup>2+</sup>  |                              | -5946.712019 (-527.744968) | 0.247596 (0.247714)  | 649.4 (649.7)       |                    |
| VII  | Cd(L233H) <sup>3+</sup> | 2, 3                         | -5946.757177 (-527.795354) | 0.259351 (0.259543)  | 680.2 (680.7)       | 0.62357 (0.70183)  |
| VIII | Cd(L233H) <sup>3+</sup> | 3, 3                         | -5946.763671 (-527.800829) | 0.259828 (0.260352)  | 681.5 (682.9)       | 0.37642 (0.29816)  |
| IX   | Cd(L333) <sup>2+</sup>  |                              | -5986.014665 (-567.039147) | 0.276006 (0.273569)  | 723.9 (717.5)       |                    |
| X    | Cd(L333H) <sup>3+</sup> | 3,3                          | -5986.067612 (-567.096404) | 0.287991 (0.287696)  | 755.3 (754.6)       | 1 (1)              |

<sup>a</sup> The data in parentheses are calculated using LanL2DZ basis set

<sup>b</sup> Note that for the symmetrical complexes ( $[\text{ML222}]^{2+}$  and  $[\text{ML333}]^{2+}$ ) there is only one microspecies.

Cartesian coordinate representation of the optimized molecular structure of the [ZnL]<sup>2+</sup>, [CuL]<sup>2+</sup>, [CdL]<sup>2+</sup> and [NiL]<sup>2+</sup> complexes of Triazacycloalkanes ([X] ane N<sub>3</sub>, X = 9 – 12) and their possible protonated forms at B3LYP/LanL2DZ and B3LYP/DGDZVP2 level of theory

**B3LYP/LanL2DZ**

**Cu(L222)<sup>2+</sup>(I)**

|    |           |           |           |
|----|-----------|-----------|-----------|
| N  | 0.516441  | -0.705162 | 1.784516  |
| C  | 0.516441  | 0.816497  | 1.784516  |
| C  | -0.846277 | -1.373302 | 1.784516  |
| Cu | 1.102495  | -1.290664 | -0.092844 |
| C  | 1.428680  | 1.360844  | 0.669114  |
| N  | 1.165065  | 0.628153  | -0.642821 |
| N  | -0.812107 | -1.435237 | -0.806630 |
| C  | -1.635914 | -1.183756 | 0.448660  |
| C  | -0.167097 | 0.943534  | -1.326046 |
| C  | -0.865347 | -0.328934 | -1.848129 |
| H  | 1.071896  | -1.065731 | 2.568003  |
| H  | 0.868373  | 1.192003  | 2.750992  |
| H  | -0.514360 | 1.163742  | 1.666975  |
| H  | -1.468121 | -0.974997 | 2.597624  |
| H  | -0.681791 | -2.437806 | 1.993091  |
| H  | 2.485353  | 1.210407  | 0.917432  |
| H  | 1.269060  | 2.437806  | 0.523778  |
| H  | 1.947298  | 0.783509  | -1.294488 |
| H  | -1.087449 | -2.322887 | -1.239665 |
| H  | -2.051164 | -0.173891 | 0.391691  |
| H  | -2.485353 | -1.874789 | 0.472264  |
| H  | 0.015556  | 1.631376  | -2.159408 |
| H  | -0.791978 | 1.469822  | -0.600609 |
| H  | -1.903610 | -0.088686 | -2.109044 |
| H  | -0.374741 | -0.708477 | -2.750992 |

**Cu(L222H)<sup>3+</sup>(II)**

|    |           |           |           |
|----|-----------|-----------|-----------|
| N  | 0.809004  | -0.654621 | 1.655316  |
| C  | 0.809004  | 0.890711  | 1.655316  |
| C  | -0.563663 | -1.353848 | 1.655316  |
| Cu | 2.080271  | -1.198304 | 0.178620  |
| C  | 1.562145  | 1.455533  | 0.428650  |
| N  | 1.496101  | 0.482994  | -0.757096 |
| C  | -1.673840 | -0.807552 | 0.738801  |
| N  | -1.694481 | -1.255061 | -0.740890 |
| C  | 0.174571  | 0.411981  | -1.540885 |
| C  | -0.476438 | -0.989599 | -1.660778 |
| H  | 1.287720  | -0.986496 | 2.511483  |
| H  | 1.297635  | 1.235895  | 2.572883  |
| H  | -0.225102 | 1.236853  | 1.701969  |
| H  | -0.950524 | -1.236679 | 2.681247  |
| H  | -0.397857 | -2.431949 | 1.526575  |
| H  | 2.624716  | 1.609752  | 0.654577  |

|   |           |           |           |
|---|-----------|-----------|-----------|
| H | 1.160329  | 2.431949  | 0.125530  |
| H | 2.245808  | 0.735943  | -1.422754 |
| H | -1.736375 | 0.282371  | 0.741392  |
| H | -2.624716 | -1.167768 | 1.152658  |
| H | -1.903048 | -2.268580 | -0.788071 |
| H | -2.520160 | -0.793327 | -1.164997 |
| H | 0.404047  | 0.754637  | -2.556652 |
| H | -0.511309 | 1.151415  | -1.113447 |
| H | -0.853083 | -1.126893 | -2.681247 |
| H | 0.238303  | -1.805948 | -1.495096 |

**Cu(L223)<sup>2+</sup>(III)**

|    |           |           |           |
|----|-----------|-----------|-----------|
| N  | 0.409165  | -0.283911 | -1.934555 |
| C  | 0.409165  | 1.259490  | -1.934555 |
| C  | -0.974738 | -0.932334 | -1.934555 |
| Cu | 1.116625  | -0.634315 | -0.110285 |
| C  | 0.922773  | 1.922668  | -0.614633 |
| N  | 0.657910  | 0.437676  | 1.487085  |
| C  | -0.978685 | -2.210630 | -1.077029 |
| N  | -0.373707 | -1.920698 | 0.288775  |
| C  | 0.156184  | 1.687164  | 0.730412  |
| C  | -1.254206 | -1.176276 | 1.283891  |
| C  | -0.389945 | -0.348463 | 2.256197  |
| H  | 0.947806  | -0.623520 | -2.738249 |
| H  | -0.603948 | 1.604932  | -2.166273 |
| H  | 1.062188  | 1.592259  | -2.747367 |
| H  | -1.286623 | -1.167204 | -2.957928 |
| H  | -1.685167 | -0.198961 | -1.541956 |
| H  | 0.888862  | 3.002639  | -0.811850 |
| H  | 2.002677  | 1.723282  | -0.473479 |
| H  | 1.415462  | 0.710304  | 2.123400  |
| H  | -0.379759 | -3.002639 | -1.539076 |
| H  | -2.002677 | -2.589404 | -0.961380 |
| H  | -0.011587 | -2.786588 | 0.709563  |
| H  | -0.919073 | 1.573350  | 0.559327  |
| H  | 0.291072  | 2.556017  | 1.382877  |
| H  | -1.866167 | -1.894505 | 1.842606  |
| H  | -1.936941 | -0.538986 | 0.715065  |
| H  | -1.027463 | 0.323006  | 2.844089  |
| H  | 0.142536  | -0.999838 | 2.957928  |

**Cu(L223H)<sup>3+</sup>(IV)**

|    |           |           |           |
|----|-----------|-----------|-----------|
| N  | 0.638121  | -0.467966 | -1.786250 |
| C  | 0.638121  | 1.066898  | -1.786250 |
| C  | -0.728559 | -1.169573 | -1.786250 |
| Cu | 1.931851  | -1.077502 | -0.367727 |
| C  | 1.768011  | 1.683452  | -0.928254 |
| N  | 1.443896  | 0.154753  | 1.144307  |
| C  | -1.113865 | -1.964046 | -0.517336 |
| N  | -1.837681 | -1.190025 | 0.605106  |
| C  | 1.539158  | 1.590750  | 0.604984  |
| C  | 0.185804  | -0.184015 | 1.952423  |

|   |           |           |           |
|---|-----------|-----------|-----------|
| C | -1.174603 | 0.043799  | 1.258345  |
| H | 1.139502  | -0.774849 | -2.638706 |
| H | -0.344609 | 1.416601  | -1.459000 |
| H | 0.772896  | 1.393358  | -2.827791 |
| H | -0.706253 | -1.902423 | -2.601755 |
| H | -1.492847 | -0.430401 | -2.057298 |
| H | 1.827942  | 2.752598  | -1.174712 |
| H | 2.756572  | 1.283827  | -1.213977 |
| H | 2.243994  | -0.005352 | 1.784020  |
| H | -0.258332 | -2.476082 | -0.059662 |
| H | -1.815790 | -2.752598 | -0.817044 |
| H | -2.756572 | -0.876231 | 0.243371  |
| H | -2.061995 | -1.876154 | 1.348545  |
| H | 0.631683  | 2.131013  | 0.889435  |
| H | 2.387857  | 2.072254  | 1.108532  |
| H | 0.210343  | 0.482910  | 2.827791  |
| H | 0.293988  | -1.201616 | 2.349466  |
| H | -1.891623 | 0.372741  | 2.019938  |
| H | -1.141679 | 0.829330  | 0.501223  |

**Cu(L223H)<sup>3+</sup>(V)**

|    |           |           |           |
|----|-----------|-----------|-----------|
| N  | 1.836824  | -0.659424 | -1.381433 |
| C  | 1.836824  | 0.897818  | -1.381433 |
| C  | 0.479722  | -1.417882 | -1.381433 |
| C  | 1.355028  | 1.580566  | -0.080314 |
| C  | 0.041333  | -2.133503 | -0.082112 |
| N  | -0.732518 | -1.365889 | 1.002400  |
| C  | -0.185176 | 1.856892  | 0.027982  |
| Cu | 0.263795  | -0.055583 | 2.183156  |
| N  | -0.817350 | 1.408471  | 1.340228  |
| C  | -2.012632 | -0.639227 | 0.527370  |
| C  | -2.175823 | 0.713313  | 1.242069  |
| H  | 2.315939  | -0.924541 | -2.261012 |
| H  | 2.453566  | -1.004413 | -0.628828 |
| H  | 1.252590  | 1.210080  | -2.253573 |
| H  | 2.881092  | 1.173435  | -1.568674 |
| H  | 0.596026  | -2.216967 | -2.122794 |
| H  | -0.267681 | -0.733262 | -1.786779 |
| H  | 1.887128  | 2.537783  | -0.024265 |
| H  | 1.741158  | 1.020925  | 0.798121  |
| H  | 0.881749  | -2.644069 | 0.407794  |
| H  | -0.639231 | -2.935897 | -0.410927 |
| H  | -1.011673 | -2.088965 | 1.689119  |
| H  | -0.735832 | 1.375666  | -0.782747 |
| H  | -0.367028 | 2.935897  | -0.058855 |
| H  | -0.867005 | 2.199276  | 2.004717  |
| H  | -2.880925 | -1.275865 | 0.734551  |
| H  | -1.955229 | -0.519505 | -0.555255 |
| H  | -2.881092 | 1.359780  | 0.699794  |
| H  | -2.565753 | 0.598919  | 2.261012  |

**Cu(L233)<sup>2+</sup>(VI)**

|    |           |           |           |
|----|-----------|-----------|-----------|
| N  | 0.405320  | -0.092379 | -2.381424 |
| C  | 0.405320  | 1.425766  | -2.381424 |
| C  | -0.977589 | -0.780838 | -2.381424 |
| Cu | 0.971066  | -0.674253 | -0.592947 |
| C  | -1.021159 | -2.126873 | -1.581463 |
| N  | 0.931771  | 1.221186  | 0.073496  |
| C  | 0.095415  | 1.954297  | -0.967915 |
| N  | 0.109836  | -1.788521 | 0.763692  |
| C  | -1.192269 | -2.074951 | -0.025995 |
| C  | -0.085436 | -1.153389 | 2.138453  |
| C  | 0.434955  | 1.320704  | 1.506613  |
| C  | 0.799026  | 0.092105  | 2.372942  |
| H  | 0.949311  | -0.431550 | -3.182560 |
| H  | -0.328472 | 1.818541  | -3.095472 |
| H  | 1.397865  | 1.749957  | -2.713876 |
| H  | -1.258162 | -0.975719 | -3.422205 |
| H  | -1.706031 | -0.072402 | -1.972845 |
| H  | -0.178718 | -2.779853 | -1.868405 |
| H  | -1.906642 | -2.659699 | -1.952550 |
| H  | 1.911231  | 1.538017  | 0.030323  |
| H  | -0.955504 | 1.798027  | -0.705181 |
| H  | 0.290531  | 3.032544  | -0.914910 |
| H  | 0.617388  | -2.673831 | 0.886350  |
| H  | -1.596366 | -3.032544 | 0.321047  |
| H  | -1.911231 | -1.295601 | 0.246643  |
| H  | 0.141848  | -1.903778 | 2.903407  |
| H  | -1.143076 | -0.890023 | 2.246123  |
| H  | -0.650753 | 1.459858  | 1.475614  |
| H  | 0.873341  | 2.224007  | 1.951554  |
| H  | 1.865212  | -0.159678 | 2.271017  |
| H  | 0.666654  | 0.386493  | 3.422205  |

**Cu(L233H)<sup>3+</sup>(VII)**

|    |           |           |           |
|----|-----------|-----------|-----------|
| N  | 0.401370  | -0.144467 | -1.831485 |
| C  | 0.401370  | 1.393837  | -1.831485 |
| C  | -0.976498 | -0.819390 | -1.831485 |
| Cu | 1.606488  | -1.194652 | -0.594674 |
| C  | -0.911057 | -2.303047 | -1.411220 |
| C  | -0.277862 | 2.171980  | -0.676516 |
| N  | 0.307486  | -1.788150 | 0.811638  |
| N  | 0.629819  | 2.645966  | 0.494440  |
| C  | -0.813863 | -2.564683 | 0.123595  |
| C  | -0.146972 | -0.571023 | 1.597468  |
| C  | 0.530986  | 1.934095  | 1.874397  |
| C  | 0.989156  | 0.457289  | 1.876879  |
| H  | 0.855514  | -0.403358 | -2.727058 |
| H  | -0.145174 | 1.677812  | -2.744017 |
| H  | 1.436067  | 1.724815  | -1.990651 |
| H  | -1.365234 | -0.759395 | -2.859744 |
| H  | -1.655993 | -0.246547 | -1.195514 |
| H  | -0.103848 | -2.830766 | -1.947689 |
| H  | -1.832881 | -2.794570 | -1.749480 |
| H  | -1.135865 | 1.660387  | -0.237308 |



|   |           |           |           |
|---|-----------|-----------|-----------|
| H | -0.666885 | 3.092887  | -1.124458 |
| H | 0.861063  | -2.419820 | 1.416758  |
| H | 0.378589  | 3.633276  | 0.680244  |
| H | 1.618502  | 2.670305  | 0.197991  |
| H | -0.635255 | -3.633276 | 0.284879  |
| H | -1.756725 | -2.292536 | 0.611937  |
| H | -0.566613 | -0.932332 | 2.547763  |
| H | -0.975571 | -0.129601 | 1.039739  |
| H | -0.502776 | 2.051871  | 2.215882  |
| H | 1.169235  | 2.525468  | 2.540048  |
| H | 1.832881  | 0.339390  | 1.166979  |
| H | 1.432113  | 0.258733  | 2.859744  |

**Cu(L233H)<sup>3+</sup>(VIII)**

|    |           |           |           |
|----|-----------|-----------|-----------|
| N  | 1.249396  | -0.521384 | -2.307185 |
| C  | 1.249396  | 1.010365  | -2.307185 |
| C  | -0.093146 | -1.273107 | -2.307185 |
| Cu | 2.404356  | -0.927871 | -0.702921 |
| C  | -0.695644 | -1.621344 | -0.912393 |
| N  | 1.997752  | 0.887362  | 0.094782  |
| C  | 1.036228  | 1.552510  | -0.890995 |
| C  | -1.828884 | -0.682128 | -0.409276 |
| C  | 1.582980  | 0.918195  | 1.571527  |
| N  | -1.942703 | -0.624654 | 1.131545  |
| C  | 0.463110  | -0.041969 | 2.061967  |
| C  | -1.030360 | 0.386108  | 1.880446  |
| H  | 1.768396  | -0.837469 | -3.143612 |
| H  | 0.467494  | 1.376837  | -2.985262 |
| H  | 2.211780  | 1.335552  | -2.721240 |
| H  | 0.091465  | -2.203610 | -2.853115 |
| H  | -0.792450 | -0.679529 | -2.914089 |
| H  | 0.116065  | -1.690102 | -0.172853 |
| H  | -1.100839 | -2.637632 | -0.986150 |
| H  | 2.915683  | 1.363448  | 0.035389  |
| H  | 0.023869  | 1.365976  | -0.539291 |
| H  | 1.203346  | 2.637632  | -0.872420 |
| H  | -2.794869 | -1.042628 | -0.778871 |
| H  | -1.726386 | 0.353462  | -0.743194 |
| H  | 1.316441  | 1.964678  | 1.795481  |
| H  | 2.493107  | 0.703502  | 2.144009  |
| H  | -2.915683 | -0.348371 | 1.351222  |
| H  | -1.826693 | -1.568737 | 1.535526  |
| H  | 0.643075  | -1.066577 | 1.707045  |
| H  | 0.636229  | -0.107935 | 3.143612  |
| H  | -1.492121 | 0.499776  | 2.866624  |
| H  | -1.151991 | 1.342847  | 1.364229  |

**Cu(L333)<sup>2+</sup>(IX)**

|   |           |           |           |
|---|-----------|-----------|-----------|
| N | -0.309695 | -0.000148 | -2.104533 |
| C | -0.309695 | 1.526518  | -2.104533 |

|    |           |           |           |
|----|-----------|-----------|-----------|
| C  | -1.718156 | -0.589114 | -2.104533 |
| Cu | 0.794842  | -0.734411 | -0.604102 |
| C  | 1.008690  | 2.197012  | -1.662335 |
| C  | -1.829284 | -2.062118 | -1.655955 |
| N  | 1.862894  | 0.697907  | 0.185515  |
| N  | -0.116901 | -2.267157 | 0.192564  |
| C  | 1.320097  | 2.072583  | -0.154524 |
| C  | -1.594705 | -2.295260 | -0.147104 |
| C  | 0.224504  | -1.975415 | 1.672373  |
| C  | 1.729337  | 0.273023  | 1.666431  |
| C  | 0.395461  | -0.461076 | 2.030062  |
| H  | 0.192376  | -0.334322 | -2.940412 |
| H  | -1.126795 | 1.846175  | -1.449374 |
| H  | -0.556662 | 1.852876  | -3.124413 |
| H  | -2.112616 | -0.491803 | -3.125590 |
| H  | -2.329548 | 0.044295  | -1.453382 |
| H  | 0.903610  | 3.264792  | -1.893145 |
| H  | 1.859389  | 1.849817  | -2.266969 |
| H  | -1.181287 | -2.716112 | -2.257781 |
| H  | -2.855212 | -2.377134 | -1.885564 |
| H  | 2.855212  | 0.671552  | -0.078106 |
| H  | 0.288431  | -3.174256 | -0.067766 |
| H  | 0.417135  | 2.240324  | 0.443937  |
| H  | 2.057235  | 2.828310  | 0.142824  |
| H  | -2.009368 | -3.264792 | 0.154515  |
| H  | -2.096197 | -1.523363 | 0.448134  |
| H  | 1.141539  | -2.527643 | 1.908677  |
| H  | -0.579510 | -2.391559 | 2.290424  |
| H  | 1.810601  | 1.175674  | 2.283066  |
| H  | 2.590132  | -0.364381 | 1.899927  |
| H  | 0.336162  | -0.418690 | 3.125590  |
| H  | -0.474127 | 0.120061  | 1.685310  |

**Cu(L333H)<sup>3+</sup>(X)**

|    |           |           |           |
|----|-----------|-----------|-----------|
| N  | 2.340449  | -1.745825 | -1.373039 |
| C  | 2.340449  | -0.198941 | -1.373039 |
| C  | 0.973036  | -2.491873 | -1.373039 |
| C  | 2.162679  | 0.410570  | 0.051595  |
| C  | 0.075773  | -2.302882 | -0.119932 |
| C  | 1.255490  | 1.677069  | 0.060573  |
| C  | -0.919828 | -1.113654 | -0.229446 |
| N  | 0.465151  | 1.853931  | 1.355022  |
| N  | -1.424612 | -0.599484 | 1.109987  |
| Cu | 0.018516  | 0.130489  | 2.293462  |
| C  | -2.463763 | 0.521751  | 1.027261  |
| C  | -0.859907 | 2.601509  | 1.209542  |
| C  | -1.950225 | 1.844078  | 0.413711  |
| H  | 2.819774  | -2.047578 | -2.239602 |
| H  | 2.924634  | -2.097764 | -0.597611 |
| H  | 1.551383  | 0.103156  | -2.068437 |
| H  | 3.296357  | 0.109829  | -1.807598 |

|   |           |           |           |
|---|-----------|-----------|-----------|
| H | 1.237483  | -3.549695 | -1.474396 |
| H | 0.461521  | -2.190099 | -2.293462 |
| H | 3.145640  | 0.644471  | 0.475161  |
| H | 1.718845  | -0.351428 | 0.711238  |
| H | 0.697238  | -2.244299 | 0.787525  |
| H | -0.492932 | -3.234721 | -0.011781 |
| H | 0.529790  | 1.650955  | -0.754905 |
| H | 1.859195  | 2.584848  | -0.075767 |
| H | -1.803585 | -1.428023 | -0.804392 |
| H | -0.487181 | -0.263452 | -0.758157 |
| H | 1.050796  | 2.349576  | 2.050369  |
| H | -1.831939 | -1.384295 | 1.648850  |
| H | -2.861615 | 0.670692  | 2.039172  |
| H | -3.296357 | 0.154536  | 0.405878  |
| H | -0.650479 | 3.549695  | 0.687837  |
| H | -1.201287 | 2.859899  | 2.219768  |
| H | -2.816590 | 2.518620  | 0.380473  |
| H | -1.664446 | 1.711286  | -0.635706 |

**B3LYP/DZVP2**  
**Cu(L222)<sup>2+</sup>(I)**

|    |           |           |           |
|----|-----------|-----------|-----------|
| N  | 1.287512  | 0.861527  | 0.377603  |
| C  | 1.774374  | -0.172753 | -0.606598 |
| C  | 0.397340  | 1.937420  | -0.173710 |
| Cu | -0.098740 | -0.054431 | 1.564777  |
| C  | 1.502134  | -1.586324 | -0.074477 |
| N  | 0.095378  | -1.686374 | 0.461558  |
| N  | -1.674874 | 0.524153  | 0.404639  |
| C  | -1.011204 | 1.429918  | -0.602902 |
| C  | -1.011333 | -1.676612 | -0.573214 |
| C  | -2.183097 | -0.780774 | -0.145159 |
| H  | 2.079230  | 1.302365  | 0.846898  |
| H  | 2.846386  | -0.053662 | -0.777646 |
| H  | 1.280661  | -0.001394 | -1.564777 |
| H  | 0.860586  | 2.415509  | -1.044144 |
| H  | 0.307931  | 2.700076  | 0.606172  |
| H  | 2.174373  | -1.823538 | 0.754484  |
| H  | 1.652732  | -2.340478 | -0.855110 |
| H  | 0.015383  | -2.521417 | 1.049569  |
| H  | -2.448173 | 1.015284  | 0.853828  |
| H  | -0.952460 | 0.902864  | -1.555912 |
| H  | -1.635883 | 2.310806  | -0.767746 |
| H  | -1.363418 | -2.700076 | -0.726309 |
| H  | -0.577218 | -1.338387 | -1.514111 |
| H  | -2.846386 | -0.618340 | -1.000617 |
| H  | -2.767909 | -1.255370 | 0.646748  |

**Cu(L222H)<sup>3+</sup>(II)**

|   |           |          |           |
|---|-----------|----------|-----------|
| N | -0.793001 | 1.640723 | -0.643760 |
| C | -0.780132 | 1.633716 | 0.887341  |

|    |           |           |           |
|----|-----------|-----------|-----------|
| C  | 0.558983  | 1.652772  | -1.346090 |
| Cu | -2.043792 | 0.181367  | -1.187562 |
| C  | -1.549801 | 0.418288  | 1.437593  |
| N  | -1.477620 | -0.751639 | 0.472823  |
| C  | 1.672081  | 0.737952  | -0.821312 |
| N  | 1.683215  | -0.732558 | -1.244147 |
| C  | -0.176063 | -1.544357 | 0.414752  |
| C  | 0.496508  | -1.664667 | -0.969873 |
| H  | -1.263014 | 2.501204  | -0.957475 |
| H  | -1.246599 | 2.555214  | 1.243852  |
| H  | 0.255058  | 1.651566  | 1.224949  |
| H  | 0.946277  | 2.674280  | -1.222939 |
| H  | 0.384647  | 1.532667  | -2.421156 |
| H  | -2.612195 | 0.651842  | 1.560984  |
| H  | -1.175010 | 0.112776  | 2.421156  |
| H  | -2.223711 | -1.409751 | 0.732205  |
| H  | 1.762425  | 0.752956  | 0.264115  |
| H  | 2.612195  | 1.143320  | -1.209622 |
| H  | 1.892755  | -0.795271 | -2.251433 |
| H  | 2.515555  | -1.142927 | -0.794409 |
| H  | -0.426461 | -2.559332 | 0.734623  |
| H  | 0.503879  | -1.141049 | 1.169941  |
| H  | 0.902601  | -2.674280 | -1.079193 |
| H  | -0.209446 | -1.542238 | -1.798057 |

**Cu(L223)<sup>2+</sup>(III)**

|    |           |           |           |
|----|-----------|-----------|-----------|
| N  | 0.809131  | 1.325447  | -0.518023 |
| C  | 2.019784  | 0.663739  | 0.141711  |
| C  | -0.241593 | 1.846538  | 0.440295  |
| Cu | -0.033101 | -0.239601 | -1.384425 |
| C  | 2.149269  | -0.868663 | -0.093709 |
| N  | -0.097682 | -2.028827 | -0.577471 |
| C  | -1.648151 | 1.632627  | -0.129955 |
| N  | -1.803803 | 0.206242  | -0.587783 |
| C  | 1.043541  | -1.837830 | 0.421531  |
| C  | -2.012131 | -0.837680 | 0.480094  |
| C  | -1.474107 | -2.195311 | 0.006921  |
| H  | 1.131947  | 2.092894  | -1.107451 |
| H  | 1.990450  | 0.884766  | 1.210975  |
| H  | 2.916768  | 1.135230  | -0.263783 |
| H  | -0.080104 | 2.907118  | 0.647635  |
| H  | -0.121681 | 1.312914  | 1.384425  |
| H  | 3.077112  | -1.151816 | 0.415792  |
| H  | 2.368631  | -1.079489 | -1.154178 |
| H  | 0.113233  | -2.835665 | -1.166530 |
| H  | -1.820319 | 2.268137  | -1.001999 |
| H  | -2.409851 | 1.874517  | 0.619076  |
| H  | -2.550796 | 0.145383  | -1.284648 |
| H  | 0.615196  | -1.481405 | 1.360132  |
| H  | 1.485516  | -2.817107 | 0.618272  |
| H  | -3.077112 | -0.913399 | 0.718394  |
| H  | -1.497659 | -0.499185 | 1.380502  |
| H  | -1.465080 | -2.907118 | 0.837931  |

H -2.107898 -2.609154 -0.781277

**Cu(L223H)<sup>3+</sup>(IV)**

N -0.633267 -1.753831 -0.482897  
C -0.637568 -1.777151 1.038825  
C 0.722809 -1.772865 -1.173192  
Cu -1.902303 -0.342304 -1.086006  
C -1.754935 -0.918969 1.659258  
N -1.425209 1.138164 0.143834  
C 1.127032 -0.516856 -1.965291  
N 1.821248 0.609619 -1.199867  
C -1.518713 0.605635 1.569268  
C -0.190508 1.953374 -0.192319  
C 1.176748 1.279344 0.015650  
H -1.127080 -2.602780 -0.789432  
H 0.346104 -1.465670 1.392998  
H -0.782474 -2.819716 1.346904  
H 0.692064 -2.583182 -1.907065  
H 1.481066 -2.051319 -0.434792  
H -1.816805 -1.168865 2.724722  
H -2.741934 -1.195784 1.256694  
H -2.218450 1.780188 0.000873  
H 0.290813 -0.070463 -2.513572  
H 1.852719 -0.824949 -2.724722  
H 2.741934 0.266505 -0.887224  
H 2.051688 1.338250 -1.892086  
H -0.608972 0.884018 2.103578  
H -2.360129 1.115678 2.049960  
H -0.215376 2.819716 0.481313  
H -0.310783 2.357167 -1.202795  
H 1.889603 2.056451 0.305953  
H 1.173742 0.546023 0.821587

**Cu(L223H)<sup>3+</sup>(V)**

N 2.329593 0.166449 -0.793461  
C 2.111970 -1.301286 -0.384616  
C 1.617543 1.304398 -0.041797  
C 0.731600 -1.918657 -0.679241  
C 0.428023 2.003288 -0.723325  
N -0.965920 1.405087 -0.638559  
C -0.363471 -1.763054 0.426580  
Cu -1.420006 -0.201017 -1.748550  
N -1.678855 -1.207897 -0.067615  
C -1.483130 1.120981 0.773921  
C -2.338801 -0.149795 0.787309  
H 3.337810 0.326749 -0.652979  
H 2.208534 0.266771 -1.809148  
H 2.373314 -1.369114 0.674290  
H 2.872968 -1.850373 -0.945633  
H 2.373136 2.086754 0.070351  
H 1.407602 0.939576 0.963646

|   |           |           |           |
|---|-----------|-----------|-----------|
| H | 0.915683  | -2.985901 | -0.833933 |
| H | 0.373901  | -1.582973 | -1.672851 |
| H | 0.634000  | 2.213532  | -1.778663 |
| H | 0.359636  | 2.985901  | -0.235722 |
| H | -1.575146 | 2.125911  | -1.049157 |
| H | -0.021115 | -1.123082 | 1.239076  |
| H | -0.581079 | -2.743260 | 0.861610  |
| H | -2.341990 | -1.975534 | -0.238415 |
| H | -2.072104 | 1.975217  | 1.119756  |
| H | -0.625530 | 1.029963  | 1.437738  |
| H | -2.470275 | -0.527169 | 1.809148  |
| H | -3.337810 | 0.024509  | 0.375478  |

**Cu(L233)<sup>2+</sup>(VI)**

|    |           |           |           |
|----|-----------|-----------|-----------|
| N  | 2.273552  | -0.213831 | -0.693304 |
| C  | 2.383817  | -1.622598 | -0.180508 |
| C  | 2.389638  | 0.900353  | 0.346423  |
| Cu | 0.409170  | 0.084281  | -1.191907 |
| C  | 1.502015  | 2.148121  | 0.058166  |
| N  | -0.105295 | -1.670537 | -0.388611 |
| C  | 1.065860  | -2.044289 | 0.482751  |
| N  | -0.905293 | 1.373350  | -0.570340 |
| C  | -0.008533 | 2.099811  | 0.435371  |
| C  | -2.200073 | 0.826673  | -0.010022 |
| C  | -1.446200 | -1.640727 | 0.292020  |
| C  | -2.437537 | -0.654654 | -0.353681 |
| H  | 2.982662  | -0.067040 | -1.412801 |
| H  | 3.209454  | -1.722665 | 0.530528  |
| H  | 2.606696  | -2.258545 | -1.041123 |
| H  | 3.436015  | 1.212046  | 0.391095  |
| H  | 2.134909  | 0.475545  | 1.319735  |
| H  | 1.641589  | 2.494901  | -0.976434 |
| H  | 1.926221  | 2.953762  | 0.666930  |
| H  | -0.155871 | -2.310365 | -1.187853 |
| H  | 0.925274  | -1.539596 | 1.440779  |
| H  | 1.063956  | -3.121738 | 0.675351  |
| H  | -1.137005 | 2.031044  | -1.317867 |
| H  | -0.380386 | 3.121738  | 0.548078  |
| H  | -0.135343 | 1.597236  | 1.396376  |
| H  | -3.026409 | 1.421391  | -0.406026 |
| H  | -2.188825 | 0.967540  | 1.072975  |
| H  | -1.280776 | -1.390205 | 1.342242  |
| H  | -1.862732 | -2.653176 | 0.254096  |
| H  | -2.475644 | -0.799152 | -1.440779 |
| H  | -3.436015 | -0.913306 | 0.012969  |

**Cu(L233H)<sup>3+</sup>(VII)**

|    |           |           |           |
|----|-----------|-----------|-----------|
| N  | 0.812191  | 1.385298  | 0.720418  |
| C  | -0.603558 | 1.936564  | 0.639401  |
| C  | 1.605394  | 1.387588  | -0.577022 |
| Cu | 1.228729  | -0.294606 | 1.717234  |
| C  | 2.839793  | 0.474293  | -0.514343 |

|   |           |           |           |
|---|-----------|-----------|-----------|
| C | -1.660435 | 1.260795  | -0.258618 |
| N | 1.485231  | -1.574744 | 0.231336  |
| N | -2.560754 | 0.186639  | 0.378457  |
| C | 2.563216  | -1.042821 | -0.689860 |
| C | 0.153747  | -1.812366 | -0.424234 |
| C | -2.351717 | -1.304211 | 0.065818  |
| C | -1.029605 | -1.905214 | 0.575254  |
| H | 1.295965  | 2.050539  | 1.340886  |
| H | -0.493584 | 2.953792  | 0.242039  |
| H | -0.969249 | 2.057250  | 1.664291  |
| H | 1.935038  | 2.420273  | -0.749316 |
| H | 0.941652  | 1.118477  | -1.399518 |
| H | 3.412293  | 0.657790  | 0.407533  |
| H | 3.518629  | 0.762031  | -1.324331 |
| H | -1.264960 | 0.848701  | -1.186601 |
| H | -2.345412 | 2.061390  | -0.547978 |
| H | 1.811963  | -2.442083 | 0.679790  |
| H | -3.518629 | 0.392790  | 0.060954  |
| H | -2.605783 | 0.316755  | 1.396931  |
| H | 3.483765  | -1.593406 | -0.482304 |
| H | 2.254874  | -1.254728 | -1.717234 |
| H | 0.232905  | -2.742374 | -1.000264 |
| H | 0.017037  | -1.009282 | -1.147790 |
| H | -2.471852 | -1.416290 | -1.014438 |
| H | -3.196193 | -1.804674 | 0.546050  |
| H | -0.781793 | -1.450096 | 1.552008  |
| H | -1.228108 | -2.953792 | 0.814311  |

**Cu(L233H)<sup>3+</sup>(VIII)**

|    |           |           |           |
|----|-----------|-----------|-----------|
| N  | 2.263314  | 1.278991  | -0.327091 |
| C  | 2.222125  | 0.649869  | 1.051625  |
| C  | 1.278468  | 2.383181  | -0.688298 |
| Cu | 2.156502  | -0.323966 | -1.506499 |
| C  | -0.081514 | 1.940581  | -1.285367 |
| N  | 1.288620  | -1.388566 | -0.055181 |
| C  | 1.159856  | -0.443728 | 1.119485  |
| C  | -1.270357 | 1.838828  | -0.297294 |
| C  | 0.043778  | -2.177764 | -0.416782 |
| N  | -2.335565 | 0.829931  | -0.724153 |
| C  | -1.112462 | -1.460761 | -1.152875 |
| C  | -2.156306 | -0.643917 | -0.331825 |
| H  | 3.199729  | 1.686742  | -0.442786 |
| H  | 2.037950  | 1.423136  | 1.805133  |
| H  | 3.219562  | 0.242580  | 1.242209  |
| H  | 1.796179  | 2.998715  | -1.426397 |
| H  | 1.149104  | 3.002284  | 0.208332  |
| H  | 0.051477  | 1.002229  | -1.837350 |
| H  | -0.339347 | 2.678944  | -2.049948 |
| H  | 2.009274  | -2.087036 | 0.175059  |
| H  | 0.158138  | -0.025767 | 1.092495  |
| H  | 1.261187  | -1.012429 | 2.049948  |
| H  | -1.775534 | 2.805210  | -0.231802 |
| H  | -0.984885 | 1.563935  | 0.718139  |

|   |           |           |           |
|---|-----------|-----------|-----------|
| H | -0.314546 | -2.633764 | 0.517499  |
| H | 0.387070  | -3.002284 | -1.047500 |
| H | -3.219562 | 1.129285  | -0.289172 |
| H | -2.512577 | 0.904529  | -1.734947 |
| H | -0.737129 | -0.894761 | -2.013119 |
| H | -1.667583 | -2.284604 | -1.611617 |
| H | -3.145279 | -1.082793 | -0.478335 |
| H | -1.969135 | -0.648698 | 0.743320  |

**Cu(L333)<sup>2+</sup>(IX)**

|    |           |           |           |
|----|-----------|-----------|-----------|
| N  | 0.302525  | -2.079060 | -0.006694 |
| C  | 0.298954  | -2.100750 | 1.502326  |
| C  | 1.694450  | -2.096737 | -0.589681 |
| Cu | -0.816407 | -0.606843 | -0.750371 |
| C  | -1.007083 | -1.647790 | 2.174497  |
| C  | 1.812574  | -1.639810 | -2.052551 |
| N  | -1.847966 | 0.191134  | 0.688819  |
| N  | 0.114768  | 0.196791  | -2.253446 |
| C  | -1.306503 | -0.144350 | 2.047938  |
| C  | 1.578174  | -0.136178 | -2.276512 |
| C  | -0.233090 | 1.659331  | -1.974617 |
| C  | -1.726747 | 1.655015  | 0.264357  |
| C  | -0.407246 | 2.032178  | -0.472374 |
| H  | -0.197044 | -2.909388 | -0.341520 |
| H  | 1.124943  | -1.466840 | 1.831890  |
| H  | 0.527327  | -3.126427 | 1.814295  |
| H  | 2.072079  | -3.121953 | -0.501262 |
| H  | 2.314841  | -1.463309 | 0.047969  |
| H  | -0.898782 | -1.878176 | 3.238923  |
| H  | -1.861247 | -2.243798 | 1.830682  |
| H  | 1.168027  | -2.235211 | -2.710646 |
| H  | 2.837321  | -1.867675 | -2.362037 |
| H  | -2.837321 | -0.063591 | 0.675881  |
| H  | -0.276798 | -0.056199 | -3.162593 |
| H  | -0.400436 | 0.446619  | 2.207106  |
| H  | -2.034689 | 0.161561  | 2.805156  |
| H  | 1.997030  | 0.172913  | -3.238923 |
| H  | 2.072210  | 0.453629  | -1.499599 |
| H  | -1.152166 | 1.877949  | -2.524545 |
| H  | 0.558872  | 2.282745  | -2.399571 |
| H  | -1.816073 | 2.275916  | 1.160426  |
| H  | -2.587875 | 1.873756  | -0.372453 |
| H  | -0.371595 | 3.126427  | -0.446484 |
| H  | 0.467067  | 1.714573  | 0.110293  |

**Cu(L333H)<sup>3+</sup>(X)**

|   |           |           |           |
|---|-----------|-----------|-----------|
| N | -2.316088 | -1.360672 | -1.726772 |
| C | -2.323160 | -1.363929 | -0.197673 |
| C | -0.975801 | -1.341147 | -2.483261 |
| C | -2.154420 | 0.053306  | 0.414652  |
| C | -0.076761 | -0.098668 | -2.285883 |
| C | -1.248083 | 0.073108  | 1.673171  |



|    |           |           |           |
|----|-----------|-----------|-----------|
| C  | 0.924074  | -0.218382 | -1.110693 |
| N  | -0.458826 | 1.353893  | 1.830366  |
| N  | 1.422584  | 1.102387  | -0.588889 |
| Cu | -0.011845 | 2.266344  | 0.121494  |
| C  | 2.451875  | 1.016135  | 0.520090  |
| C  | 0.847089  | 1.220778  | 2.581841  |
| C  | 1.937819  | 0.421842  | 1.843259  |
| H  | -2.787625 | -2.225195 | -2.028410 |
| H  | -2.920613 | -0.606547 | -2.077286 |
| H  | -1.535459 | -2.055926 | 0.106414  |
| H  | -3.277050 | -1.802949 | 0.101343  |
| H  | -1.258386 | -1.419211 | -3.535431 |
| H  | -0.461164 | -2.266344 | -2.212411 |
| H  | -3.136568 | 0.474239  | 0.644815  |
| H  | -1.717272 | 0.710578  | -0.347870 |
| H  | -0.694387 | 0.806717  | -2.217287 |
| H  | 0.483940  | 0.016063  | -3.218393 |
| H  | -0.527612 | -0.743875 | 1.653092  |
| H  | -1.845304 | -0.049599 | 2.583581  |
| H  | 1.803785  | -0.788820 | -1.433192 |
| H  | 0.498440  | -0.753579 | -0.263632 |
| H  | -1.040245 | 2.043111  | 2.327273  |
| H  | 1.845108  | 1.630860  | -1.365374 |
| H  | 2.853512  | 2.024928  | 0.658105  |
| H  | 3.277050  | 0.389483  | 0.154819  |
| H  | 0.632665  | 0.717914  | 3.535431  |
| H  | 1.181231  | 2.234854  | 2.822374  |
| H  | 2.800151  | 0.398410  | 2.518349  |
| H  | 1.654580  | -0.626933 | 1.722796  |

**B3LYP/LanL2DZ**  
**Zn(L222)<sup>2+</sup>(I)**

|    |           |           |           |
|----|-----------|-----------|-----------|
| N  | 0.529021  | -0.753428 | 1.769357  |
| C  | 0.529021  | 0.775816  | 1.769357  |
| C  | -0.861920 | -1.386888 | 1.769357  |
| Zn | 1.180304  | -1.267177 | -0.120371 |
| C  | 1.450687  | 1.387096  | 0.679871  |
| N  | 1.274730  | 0.714987  | -0.681596 |
| N  | -0.762506 | -1.413970 | -0.798708 |
| C  | -1.620679 | -1.141788 | 0.438104  |
| C  | -0.070032 | 0.989292  | -1.357741 |
| C  | -0.788932 | -0.299458 | -1.843325 |
| H  | 1.045028  | -1.098885 | 2.584440  |
| H  | 0.863418  | 1.142744  | 2.744961  |
| H  | -0.502345 | 1.115817  | 1.642583  |
| H  | -1.462188 | -0.990230 | 2.596503  |
| H  | -0.723871 | -2.460548 | 1.943695  |
| H  | 2.505312  | 1.273545  | 0.957533  |
| H  | 1.241189  | 2.460548  | 0.603788  |
| H  | 2.037361  | 1.021036  | -1.294624 |
| H  | -1.065882 | -2.286399 | -1.243243 |
| H  | -1.981601 | -0.111256 | 0.379749  |

|   |           |           |           |
|---|-----------|-----------|-----------|
| H | -2.505312 | -1.786308 | 0.422025  |
| H | 0.083127  | 1.640374  | -2.224294 |
| H | -0.696572 | 1.544715  | -0.654004 |
| H | -1.823657 | -0.047157 | -2.103151 |
| H | -0.307276 | -0.695626 | -2.744961 |

**Zn(L222H)<sup>3+</sup> (II)**

|    |           |           |           |
|----|-----------|-----------|-----------|
| N  | 1.069319  | -0.677413 | 1.750495  |
| C  | 1.069319  | 0.860568  | 1.750495  |
| C  | -0.320058 | -1.357407 | 1.750495  |
| Zn | 2.386417  | -0.926384 | 0.195864  |
| C  | 0.955240  | 1.501485  | 0.322465  |
| N  | 1.479661  | 0.608809  | -0.823649 |
| C  | -1.425362 | -0.750831 | 0.864791  |
| N  | -1.517816 | -1.233748 | -0.606772 |
| C  | 0.413313  | 0.120437  | -1.821367 |
| C  | -0.280793 | -1.228160 | -1.527884 |
| H  | 1.502473  | -0.979347 | 2.637183  |
| H  | 2.006943  | 1.170103  | 2.229814  |
| H  | 0.258377  | 1.237967  | 2.383574  |
| H  | -0.694195 | -1.267168 | 2.779434  |
| H  | -0.177212 | -2.429994 | 1.571462  |
| H  | 1.535756  | 2.429994  | 0.321969  |
| H  | -0.073801 | 1.781209  | 0.087262  |
| H  | 2.138358  | 1.176054  | -1.377312 |
| H  | -1.410352 | 0.339387  | 0.848552  |
| H  | -2.386417 | -1.039661 | 1.308030  |
| H  | -2.264601 | -0.674340 | -1.057629 |
| H  | -1.876859 | -2.205598 | -0.602224 |
| H  | 0.930819  | -0.014160 | -2.779434 |
| H  | -0.312822 | 0.928852  | -1.977259 |
| H  | -0.643235 | -1.619732 | -2.487387 |
| H  | 0.403072  | -1.998097 | -1.139366 |

**Zn(L223)<sup>2+</sup> (III)**

|    |           |           |           |
|----|-----------|-----------|-----------|
| N  | 0.509459  | -0.208924 | -1.868710 |
| C  | 0.509459  | 1.336802  | -1.868710 |
| C  | -0.898332 | -0.821921 | -1.868710 |
| Zn | 1.277207  | -0.888375 | -0.092575 |
| C  | 0.942056  | 1.994930  | -0.534665 |
| N  | 0.729155  | 0.356776  | 1.428101  |
| C  | -0.972185 | -2.188024 | -1.145005 |
| N  | -0.350566 | -2.121796 | 0.245942  |
| C  | 0.158328  | 1.615218  | 0.748890  |
| C  | -1.167414 | -1.346514 | 1.277797  |
| C  | -0.281556 | -0.477747 | 2.209042  |
| H  | 0.995438  | -0.523303 | -2.715937 |
| H  | -0.493558 | 1.672412  | -2.154023 |
| H  | 1.195502  | 1.666430  | -2.655408 |
| H  | -1.246204 | -0.947601 | -2.899632 |
| H  | -1.566763 | -0.099158 | -1.392548 |

|   |           |           |           |
|---|-----------|-----------|-----------|
| H | 0.831578  | 3.076480  | -0.686576 |
| H | 2.022912  | 1.849770  | -0.365018 |
| H | 1.470158  | 0.653230  | 2.073333  |
| H | -0.432891 | -2.960866 | -1.704911 |
| H | -2.022912 | -2.495670 | -1.084106 |
| H | -0.189452 | -3.076480 | 0.582322  |
| H | -0.899363 | 1.433020  | 0.532124  |
| H | 0.200809  | 2.437977  | 1.469892  |
| H | -1.743694 | -2.043192 | 1.895435  |
| H | -1.890604 | -0.724883 | 0.741731  |
| H | -0.927818 | 0.172522  | 2.810097  |
| H | 0.287293  | -1.111005 | 2.899632  |

**Zn(L223H)<sup>3+</sup>(IV)**

|    |           |           |           |
|----|-----------|-----------|-----------|
| N  | 0.717016  | -0.523665 | -1.804843 |
| C  | 0.717016  | 1.046902  | -1.804843 |
| C  | -0.663666 | -1.205362 | -1.804843 |
| Zn | 1.926155  | -0.909237 | -0.219406 |
| C  | 1.780949  | 1.661695  | -0.858479 |
| N  | 1.358869  | 0.285230  | 1.319367  |
| C  | -1.114163 | -1.891267 | -0.493682 |
| N  | -1.903626 | -1.043128 | 0.526667  |
| C  | 1.494332  | 1.701443  | 0.664205  |
| C  | 0.001250  | 0.025658  | 2.010122  |
| C  | -1.275107 | 0.221392  | 1.160420  |
| H  | 1.160706  | -0.804132 | -2.692055 |
| H  | -0.289999 | 1.387003  | -1.548760 |
| H  | 0.913336  | 1.369517  | -2.832086 |
| H  | -0.617069 | -2.004520 | -2.553885 |
| H  | -1.410171 | -0.490907 | -2.173774 |
| H  | 1.916159  | 2.708222  | -1.169617 |
| H  | 2.787537  | 1.232166  | -1.067314 |
| H  | 2.041799  | 0.247914  | 2.092011  |
| H  | -0.287688 | -2.367207 | 0.053471  |
| H  | -1.795313 | -2.708222 | -0.764072 |
| H  | -2.787537 | -0.741715 | 0.078072  |
| H  | -2.193099 | -1.680525 | 1.290275  |
| H  | 0.585489  | 2.270588  | 0.880609  |
| H  | 2.319382  | 2.215311  | 1.168378  |
| H  | -0.060059 | 0.750181  | 2.832086  |
| H  | 0.043901  | -0.964574 | 2.481751  |
| H  | -2.058101 | 0.611878  | 1.821166  |
| H  | -1.150568 | 0.952037  | 0.359453  |

**Zn(L223H)<sup>3+</sup>(V)**

|    |           |           |           |
|----|-----------|-----------|-----------|
| N  | 0.919513  | -0.328993 | -2.040384 |
| C  | 0.919513  | 1.215041  | -2.040384 |
| C  | -0.470002 | -1.002424 | -2.040384 |
| Zn | 1.721293  | -1.007953 | -0.297345 |
| C  | 0.770815  | 1.860759  | -0.637386 |
| C  | -0.618281 | -2.119689 | -0.968034 |

|   |           |           |           |
|---|-----------|-----------|-----------|
| N | -0.086221 | -1.697277 | 0.421973  |
| C | -0.685892 | 2.007092  | -0.106463 |
| C | -1.070064 | -0.827751 | 1.237073  |
| N | -0.839604 | 1.776197  | 1.412892  |
| C | -0.469288 | 0.386371  | 1.993863  |
| H | 1.420308  | -0.626039 | -2.890496 |
| H | 0.137884  | 1.562693  | -2.726949 |
| H | 1.880955  | 1.520210  | -2.467280 |
| H | -0.645872 | -1.453977 | -3.022775 |
| H | -1.224431 | -0.224590 | -1.912909 |
| H | 1.225226  | 2.857699  | -0.696781 |
| H | 1.420581  | 1.331501  | 0.096629  |
| H | -0.066395 | -3.023576 | -1.261538 |
| H | -1.674149 | -2.404027 | -0.893734 |
| H | 0.054462  | -2.561826 | 0.964882  |
| H | -1.389912 | 1.327788  | -0.587519 |
| H | -1.050655 | 3.023576  | -0.291508 |
| H | -1.524078 | -1.493185 | 1.979412  |
| H | -1.880955 | -0.525761 | 0.567096  |
| H | -0.290422 | 2.487885  | 1.926939  |
| H | -1.828245 | 1.972273  | 1.650344  |
| H | 0.622363  | 0.341556  | 2.075242  |
| H | -0.845997 | 0.400502  | 3.022775  |

**Zn(L233)<sup>2+</sup>(VI)**

|    |           |           |           |
|----|-----------|-----------|-----------|
| N  | 0.373230  | -0.242834 | -2.344009 |
| C  | 0.373230  | 1.284589  | -2.344009 |
| C  | -1.027150 | -0.883254 | -2.344009 |
| Zn | 1.262949  | -0.685005 | -0.553799 |
| C  | -1.125557 | -2.204259 | -1.539535 |
| N  | 1.070357  | 1.248819  | 0.104255  |
| C  | 0.119299  | 1.853548  | -0.926034 |
| N  | 0.241868  | -1.939653 | 0.656821  |
| C  | -1.152523 | -2.071488 | 0.005323  |
| C  | 0.199418  | -1.375543 | 2.096364  |
| C  | 0.529189  | 1.192912  | 1.544822  |
| C  | 1.000778  | -0.068327 | 2.312054  |
| H  | 0.868130  | -0.564527 | -3.183206 |
| H  | -0.396061 | 1.665460  | -3.025706 |
| H  | 1.346709  | 1.613687  | -2.726294 |
| H  | -1.315621 | -1.065789 | -3.384614 |
| H  | -1.729738 | -0.146619 | -1.938621 |
| H  | -0.355446 | -2.921707 | -1.863887 |
| H  | -2.077790 | -2.667920 | -1.828252 |
| H  | 1.938572  | 1.796705  | 0.113926  |
| H  | -0.902413 | 1.632089  | -0.600561 |
| H  | 0.220377  | 2.943768  | -0.953797 |
| H  | 0.640205  | -2.885018 | 0.704144  |
| H  | -1.646841 | -2.943768 | 0.446713  |
| H  | -1.730742 | -1.187826 | 0.298769  |
| H  | 0.595316  | -2.143485 | 2.768403  |
| H  | -0.852018 | -1.223213 | 2.362633  |

|   |           |           |          |
|---|-----------|-----------|----------|
| H | -0.564657 | 1.229120  | 1.494314 |
| H | 0.857225  | 2.092764  | 2.074741 |
| H | 2.077790  | -0.237982 | 2.139922 |
| H | 0.926073  | 0.155219  | 3.384614 |

**Zn(L233H)<sup>3+</sup>(VII)**

|    |           |           |           |
|----|-----------|-----------|-----------|
| N  | 0.619129  | -0.061835 | -1.848450 |
| C  | 0.619129  | 1.491728  | -1.848450 |
| C  | -0.778564 | -0.765812 | -1.848450 |
| Zn | 1.661150  | -1.162975 | -0.493299 |
| C  | -0.761850 | -2.185207 | -1.216530 |
| C  | -0.353843 | 2.293042  | -0.958293 |
| N  | 0.625579  | -2.006867 | 1.000916  |
| N  | -0.069823 | 2.421903  | 0.561614  |
| C  | -0.758712 | -2.301217 | 0.332836  |
| C  | 0.620738  | -1.088475 | 2.238020  |
| C  | -0.405259 | 1.184456  | 1.433801  |
| C  | 0.853229  | 0.409769  | 1.909338  |
| H  | 1.037190  | -0.285754 | -2.766678 |
| H  | 0.346195  | 1.794983  | -2.868675 |
| H  | 1.656359  | 1.816850  | -1.701752 |
| H  | -1.117186 | -0.827805 | -2.888016 |
| H  | -1.483478 | -0.127634 | -1.312521 |
| H  | 0.021321  | -2.825053 | -1.670942 |
| H  | -1.689030 | -2.672340 | -1.551792 |
| H  | -1.394305 | 1.969530  | -1.047077 |
| H  | -0.311566 | 3.319793  | -1.344375 |
| H  | 1.002922  | -2.913410 | 1.312648  |
| H  | 0.902650  | 2.731331  | 0.722084  |
| H  | -0.662725 | 3.205372  | 0.888036  |
| H  | -1.042711 | -3.319793 | 0.614792  |
| H  | -1.495270 | -1.627037 | 0.779217  |
| H  | 1.432179  | -1.431987 | 2.888016  |
| H  | -0.316176 | -1.240815 | 2.786963  |
| H  | -1.090787 | 0.576539  | 0.841525  |
| H  | -0.961291 | 1.544984  | 2.305068  |
| H  | 1.689030  | 0.511178  | 1.179027  |
| H  | 1.246143  | 0.886252  | 2.816614  |

**Zn(L233H)<sup>3+</sup>(VIII)**

|    |           |           |           |
|----|-----------|-----------|-----------|
| N  | 1.011098  | -0.713800 | 2.301561  |
| C  | 1.011098  | 0.829497  | 2.301561  |
| C  | -0.357463 | -1.417051 | 2.301561  |
| Zn | 1.767640  | -1.613102 | 0.626395  |
| C  | 1.025591  | 1.500770  | 0.895917  |
| N  | -0.057807 | -2.084223 | -0.178911 |
| C  | -0.998572 | -1.505994 | 0.891445  |
| C  | -0.336081 | 2.091575  | 0.431159  |

|   |           |           |           |
|---|-----------|-----------|-----------|
| C | -0.400672 | -1.656259 | -1.627826 |
| N | -0.486129 | 2.186848  | -1.104616 |
| C | -0.000477 | -0.226013 | -2.079872 |
| C | -1.027818 | 0.931736  | -1.844249 |
| H | 1.494424  | -0.998700 | 3.166063  |
| H | 1.915553  | 1.122508  | 2.843518  |
| H | 0.156294  | 1.163960  | 2.902826  |
| H | -1.044882 | -0.884430 | 2.968713  |
| H | -0.207788 | -2.417125 | 2.729499  |
| H | 1.417432  | 0.790029  | 0.146915  |
| H | 1.762856  | 2.312138  | 0.920178  |
| H | -0.172036 | -3.110576 | -0.174298 |
| H | -1.308870 | -0.520826 | 0.547426  |
| H | -1.894907 | -2.132965 | 0.958300  |
| H | -0.439891 | 3.110576  | 0.819340  |
| H | -1.201636 | 1.525042  | 0.783985  |
| H | -1.476867 | -1.822415 | -1.766895 |
| H | 0.117356  | -2.375980 | -2.270691 |
| H | -1.165052 | 2.944751  | -1.293702 |
| H | 0.399728  | 2.496814  | -1.536729 |
| H | 0.129429  | -0.308505 | -3.166063 |
| H | 1.005459  | 0.037818  | -1.718810 |
| H | -1.376888 | 1.305136  | -2.812357 |
| H | -1.915553 | 0.616296  | -1.288292 |

**Zn(L333)<sup>2+</sup> (IX)**

|    |           |           |           |
|----|-----------|-----------|-----------|
| N  | -0.210005 | -0.097913 | -2.245448 |
| C  | -0.210005 | 1.444355  | -2.245448 |
| C  | -1.625636 | -0.708933 | -2.245448 |
| Zn | 0.821872  | -0.788425 | -0.637224 |
| C  | 1.027987  | 2.086106  | -1.574241 |
| C  | -1.710147 | -2.128024 | -1.633656 |
| N  | 1.678823  | 0.665543  | 0.479688  |
| N  | -0.156459 | -2.202038 | 0.429839  |
| C  | 1.093471  | 1.993691  | -0.028001 |
| C  | -1.604146 | -2.215710 | -0.089762 |
| C  | -0.047647 | -1.844605 | 1.921237  |
| C  | 1.372558  | 0.388917  | 1.960237  |
| C  | 0.018752  | -0.323084 | 2.210427  |
| H  | 0.246331  | -0.398470 | -3.116858 |
| H  | -1.118034 | 1.767389  | -1.725020 |
| H  | -0.288827 | 1.790546  | -3.281774 |
| H  | -1.994306 | -0.727890 | -3.276949 |
| H  | -2.271179 | -0.026464 | -1.681774 |
| H  | 0.991946  | 3.153359  | -1.828460 |
| H  | 1.962704  | 1.721080  | -2.029009 |
| H  | -0.996393 | -2.814584 | -2.116073 |
| H  | -2.699679 | -2.518066 | -1.905196 |
| H  | 2.699679  | 0.730118  | 0.380659  |
| H  | 0.213751  | -3.153359 | 0.311243  |
| H  | 0.092693  | 2.101506  | 0.406419  |

|   |           |           |          |
|---|-----------|-----------|----------|
| H | 1.709842  | 2.807490  | 0.370078 |
| H | -2.080403 | -3.136329 | 0.265722 |
| H | -2.130800 | -1.376427 | 0.379269 |
| H | 0.849055  | -2.341357 | 2.310191 |
| H | -0.911823 | -2.277963 | 2.438056 |
| H | 1.386491  | 1.346128  | 2.494486 |
| H | 2.195743  | -0.217985 | 2.355247 |
| H | -0.190652 | -0.208267 | 3.281774 |
| H | -0.805459 | 0.210639  | 1.710578 |

**Zn(L333H)<sup>3+</sup>( X)**

|    |           |           |           |
|----|-----------|-----------|-----------|
| N  | 2.578868  | -0.945416 | -1.312401 |
| C  | 2.578868  | 0.615085  | -1.312401 |
| C  | 1.220629  | -1.684590 | -1.312401 |
| C  | 1.958906  | 1.315761  | -0.072687 |
| C  | 0.626791  | -1.859759 | 0.116430  |
| C  | 0.435743  | 1.600831  | -0.203662 |
| C  | -0.932034 | -1.890045 | 0.135592  |
| N  | -0.289172 | 1.785844  | 1.133442  |
| N  | -1.540086 | -1.275934 | 1.412459  |
| Zn | -0.325514 | 0.103160  | 2.241820  |
| C  | -2.835820 | -0.442007 | 1.140418  |
| C  | -1.822524 | 2.044367  | 0.948259  |
| C  | -2.622766 | 0.865412  | 0.334710  |
| H  | 3.168892  | -1.288595 | -0.537500 |
| H  | 3.073866  | -1.219984 | -2.179116 |
| H  | 2.084416  | 0.917824  | -2.241820 |
| H  | 3.636140  | 0.887841  | -1.396392 |
| H  | 1.393079  | -2.660994 | -1.776738 |
| H  | 0.564442  | -1.114700 | -1.976560 |
| H  | 2.492776  | 2.267949  | 0.034514  |
| H  | 2.205049  | 0.755552  | 0.844812  |
| H  | 0.986895  | -1.016952 | 0.736120  |
| H  | 1.033048  | -2.766213 | 0.580334  |
| H  | -0.079173 | 0.797155  | -0.734643 |
| H  | 0.282724  | 2.517026  | -0.788464 |
| H  | -1.297392 | -2.918765 | 0.048880  |
| H  | -1.338707 | -1.330974 | -0.711287 |
| H  | 0.102417  | 2.615824  | 1.603181  |
| H  | -1.809064 | -2.044428 | 2.043706  |
| H  | -3.286820 | -0.241731 | 2.121567  |
| H  | -3.531067 | -1.087724 | 0.591792  |
| H  | -1.928101 | 2.918765  | 0.295598  |
| H  | -2.213385 | 2.329524  | 1.934407  |
| H  | -3.636140 | 1.265756  | 0.184900  |
| H  | -2.275489 | 0.647213  | -0.681997 |

**B3LYP/DZVP2  
Zn(L222)<sup>2+</sup>( I)**

|    |           |           |           |
|----|-----------|-----------|-----------|
| N  | 0.505764  | -0.748056 | 1.756227  |
| C  | 0.505764  | 0.768296  | 1.756227  |
| C  | -0.867715 | -1.381147 | 1.756227  |
| Zn | 1.151402  | -1.244945 | -0.099761 |
| C  | 1.420898  | 1.377895  | 0.667379  |
| N  | 1.259056  | 0.695947  | -0.672840 |
| N  | -0.742019 | -1.433451 | -0.798729 |
| C  | -1.613857 | -1.178001 | 0.415566  |
| C  | -0.066683 | 0.955632  | -1.361918 |
| C  | -0.769822 | -0.337718 | -1.840749 |
| H  | 1.018564  | -1.092607 | 2.567662  |
| H  | 0.841041  | 1.133461  | 2.728889  |
| H  | -0.524186 | 1.105308  | 1.631279  |
| H  | -1.478078 | -0.969784 | 2.565204  |
| H  | -0.721749 | -2.446230 | 1.955655  |
| H  | 2.472465  | 1.272676  | 0.947850  |
| H  | 1.202814  | 2.446230  | 0.581439  |
| H  | 2.024814  | 0.991363  | -1.278173 |
| H  | -1.019794 | -2.307879 | -1.244034 |
| H  | -2.008372 | -0.163813 | 0.339441  |
| H  | -2.472465 | -1.851971 | 0.396341  |
| H  | 0.093179  | 1.598948  | -2.229311 |
| H  | -0.702657 | 1.511282  | -0.671297 |
| H  | -1.800991 | -0.097129 | -2.114701 |
| H  | -0.272583 | -0.737121 | -2.728889 |

**Zn(L222H)<sup>3+</sup> ( II)**

|    |           |           |           |
|----|-----------|-----------|-----------|
| N  | 1.066738  | -0.669366 | 1.754160  |
| C  | 1.066738  | 0.852333  | 1.754160  |
| C  | -0.300202 | -1.353704 | 1.754160  |
| Zn | 2.344362  | -0.895056 | 0.212696  |
| C  | 0.952664  | 1.494692  | 0.329387  |
| N  | 1.502033  | 0.628179  | -0.804911 |
| C  | -1.383912 | -0.815857 | 0.810127  |
| N  | -1.399069 | -1.313451 | -0.642009 |
| C  | 0.478579  | 0.130271  | -1.816142 |
| C  | -0.169277 | -1.240082 | -1.546052 |
| H  | 1.510070  | -0.968097 | 2.630101  |
| H  | 2.006148  | 1.156283  | 2.225870  |
| H  | 0.258090  | 1.229871  | 2.386663  |
| H  | -0.705155 | -1.206179 | 2.761911  |
| H  | -0.141935 | -2.430490 | 1.642393  |
| H  | 1.515347  | 2.430490  | 0.341176  |
| H  | -0.077461 | 1.750001  | 0.083932  |
| H  | 2.173132  | 1.195348  | -1.332641 |
| H  | -1.423935 | 0.271699  | 0.780053  |
| H  | -2.344362 | -1.145847 | 1.217914  |
| H  | -2.174075 | -0.820448 | -1.111440 |
| H  | -1.699117 | -2.299912 | -0.640277 |
| H  | 1.016510  | 0.015184  | -2.761911 |
| H  | -0.268187 | 0.914776  | -1.977136 |
| H  | -0.508425 | -1.634033 | -2.509808 |
| H  | 0.545390  | -1.986089 | -1.168058 |



**Zn(L223)<sup>2+</sup>( III)**

|    |           |           |           |
|----|-----------|-----------|-----------|
| N  | 0.477571  | -0.213558 | -1.848425 |
| C  | 0.477571  | 1.318353  | -1.848425 |
| C  | -0.913802 | -0.828534 | -1.848425 |
| Zn | 1.227988  | -0.868364 | -0.106281 |
| C  | 0.954247  | 1.972197  | -0.535135 |
| N  | 0.761784  | 0.340154  | 1.414293  |
| C  | -0.985215 | -2.181304 | -1.111102 |
| N  | -0.349858 | -2.104404 | 0.255270  |
| C  | 0.215549  | 1.612102  | 0.772951  |
| C  | -1.137932 | -1.336087 | 1.293621  |
| C  | -0.231322 | -0.478100 | 2.206003  |
| H  | 0.963325  | -0.527388 | -2.688880 |
| H  | -0.530952 | 1.651532  | -2.103051 |
| H  | 1.137502  | 1.644704  | -2.653956 |
| H  | -1.257957 | -0.965105 | -2.876224 |
| H  | -1.584187 | -0.105016 | -1.381940 |
| H  | 0.856557  | 3.052241  | -0.686649 |
| H  | 2.033675  | 1.807921  | -0.400682 |
| H  | 1.524844  | 0.603634  | 2.038649  |
| H  | -0.451891 | -2.957225 | -1.666770 |
| H  | -2.033675 | -2.484945 | -1.038232 |
| H  | -0.177593 | -3.052241 | 0.589525  |
| H  | -0.854284 | 1.470905  | 0.603528  |
| H  | 0.320337  | 2.424309  | 1.495330  |
| H  | -1.707375 | -2.028438 | 1.917586  |
| H  | -1.863625 | -0.709143 | 0.772607  |
| H  | -0.856865 | 0.172582  | 2.823432  |
| H  | 0.348395  | -1.118288 | 2.876224  |

**Zn(L223H)<sup>3+</sup>( IV)**

|    |           |           |           |
|----|-----------|-----------|-----------|
| N  | 0.704109  | -0.481152 | -1.806155 |
| C  | 0.704109  | 1.073774  | -1.806155 |
| C  | -0.650818 | -1.178571 | -1.806155 |
| Zn | 1.828413  | -0.822424 | -0.211461 |
| C  | 1.751824  | 1.679309  | -0.842699 |
| N  | 1.333761  | 0.321968  | 1.326207  |
| C  | -1.061650 | -1.891063 | -0.502546 |
| N  | -1.839694 | -1.094834 | 0.546343  |
| C  | 1.450297  | 1.725831  | 0.672315  |
| C  | 0.008151  | 0.048272  | 2.032047  |
| C  | -1.276570 | 0.176055  | 1.192278  |
| H  | 1.168077  | -0.767104 | -2.673589 |
| H  | -0.306001 | 1.411202  | -1.569995 |
| H  | 0.922807  | 1.394216  | -2.826516 |
| H  | -0.594026 | -1.967389 | -2.560649 |
| H  | -1.414009 | -0.476200 | -2.154822 |
| H  | 1.921339  | 2.716696  | -1.157007 |
| H  | 2.747915  | 1.219511  | -1.026149 |

|   |           |           |           |
|---|-----------|-----------|-----------|
| H | 2.035465  | 0.279723  | 2.073112  |
| H | -0.211375 | -2.359411 | 0.011051  |
| H | -1.728543 | -2.716696 | -0.770581 |
| H | -2.747915 | -0.832158 | 0.134806  |
| H | -2.089698 | -1.757169 | 1.295804  |
| H | 0.531246  | 2.277087  | 0.878276  |
| H | 2.263409  | 2.249505  | 1.178943  |
| H | -0.071922 | 0.797315  | 2.826516  |
| H | 0.084261  | -0.921402 | 2.534202  |
| H | -2.073081 | 0.508564  | 1.863912  |
| H | -1.202514 | 0.926173  | 0.405488  |

**Zn(L223H)<sup>3+</sup> ( V)**

|    |           |           |           |
|----|-----------|-----------|-----------|
| N  | 0.921868  | -0.298890 | -2.047405 |
| C  | 0.921868  | 1.226256  | -2.047405 |
| C  | -0.445173 | -0.983406 | -2.047405 |
| Zn | 1.669496  | -0.922453 | -0.302362 |
| C  | 0.788257  | 1.850448  | -0.640702 |
| C  | -0.587401 | -2.095693 | -0.972626 |
| N  | -0.062790 | -1.684562 | 0.404848  |
| C  | -0.654567 | 1.976389  | -0.084086 |
| C  | -1.027581 | -0.860066 | 1.261339  |
| N  | -0.790104 | 1.735330  | 1.416452  |
| C  | -0.429301 | 0.361256  | 1.997254  |
| H  | 1.438925  | -0.606072 | -2.877156 |
| H  | 0.137014  | 1.578218  | -2.724109 |
| H  | 1.880051  | 1.530302  | -2.474397 |
| H  | -0.609686 | -1.445295 | -3.023975 |
| H  | -1.207715 | -0.215485 | -1.928288 |
| H  | 1.242731  | 2.845547  | -0.679950 |
| H  | 1.453948  | 1.310325  | 0.071177  |
| H  | -0.022002 | -2.987305 | -1.264468 |
| H  | -1.638290 | -2.390519 | -0.901540 |
| H  | 0.116862  | -2.551690 | 0.919441  |
| H  | -1.359260 | 1.295910  | -0.557549 |
| H  | -1.032371 | 2.987305  | -0.256576 |
| H  | -1.417164 | -1.541153 | 2.021336  |
| H  | -1.880051 | -0.581940 | 0.637849  |
| H  | -0.246545 | 2.442272  | 1.933565  |
| H  | -1.769209 | 1.940616  | 1.663319  |
| H  | 0.659857  | 0.311395  | 2.078156  |
| H  | -0.804146 | 0.385115  | 3.023975  |

**Zn(L233)<sup>2+</sup> ( VI)**

|    |           |           |           |
|----|-----------|-----------|-----------|
| N  | 0.316531  | -0.116989 | -2.317371 |
| C  | 0.316531  | 1.394160  | -2.317371 |
| C  | -1.059250 | -0.772496 | -2.317371 |
| Zn | 1.156772  | -0.561985 | -0.554988 |
| C  | -1.104786 | -2.134406 | -1.590972 |
| N  | 1.052891  | 1.334268  | 0.100564  |

|   |           |           |           |
|---|-----------|-----------|-----------|
| C | 0.105715  | 1.962267  | -0.896544 |
| N | 0.218065  | -1.835751 | 0.616096  |
| C | -1.135554 | -2.099565 | -0.048010 |
| C | 0.122403  | -1.259962 | 2.035079  |
| C | 0.567434  | 1.296822  | 1.545798  |
| C | 0.973135  | 0.002123  | 2.282343  |
| H | 0.816851  | -0.435363 | -3.147377 |
| H | -0.465333 | 1.779193  | -2.977892 |
| H | 1.280356  | 1.716404  | -2.720512 |
| H | -1.374282 | -0.897812 | -3.355835 |
| H | -1.759391 | -0.073830 | -1.851659 |
| H | -0.312650 | -2.800176 | -1.957808 |
| H | -2.038943 | -2.615193 | -1.899793 |
| H | 1.937079  | 1.844042  | 0.077195  |
| H | -0.910813 | 1.759899  | -0.551480 |
| H | 0.228870  | 3.047716  | -0.921080 |
| H | 0.697186  | -2.734856 | 0.681016  |
| H | -1.519128 | -3.047716 | 0.336084  |
| H | -1.815029 | -1.314168 | 0.292335  |
| H | 0.433961  | -2.038748 | 2.733419  |
| H | -0.931135 | -1.051724 | 2.232560  |
| H | -0.519323 | 1.409875  | 1.533401  |
| H | 0.974367  | 2.162823  | 2.071436  |
| H | 2.038943  | -0.211615 | 2.114003  |
| H | 0.898607  | 0.207323  | 3.355835  |

**Zn(L233H)<sup>3+</sup> (VII)**

|    |           |           |           |
|----|-----------|-----------|-----------|
| N  | 0.533381  | -0.022242 | -1.812406 |
| C  | 0.533381  | 1.511049  | -1.812406 |
| C  | -0.847601 | -0.728615 | -1.812406 |
| Zn | 1.519594  | -1.099994 | -0.481261 |
| C  | -0.812436 | -2.153145 | -1.205832 |
| C  | -0.355615 | 2.304507  | -0.841949 |
| N  | 0.603587  | -2.027483 | 0.976232  |
| N  | 0.011896  | 2.376675  | 0.646535  |
| C  | -0.780650 | -2.310820 | 0.335432  |
| C  | 0.644559  | -1.165078 | 2.233142  |
| C  | -0.329604 | 1.154699  | 1.511428  |
| C  | 0.905485  | 0.330576  | 1.943965  |
| H  | 0.956885  | -0.250391 | -2.719600 |
| H  | 0.174475  | 1.817946  | -2.801385 |
| H  | 1.577059  | 1.832881  | -1.751712 |
| H  | -1.189943 | -0.777641 | -2.848556 |
| H  | -1.548617 | -0.100689 | -1.263689 |
| H  | -0.021320 | -2.763869 | -1.677366 |
| H  | -1.732447 | -2.646171 | -1.542074 |
| H  | -1.406617 | 2.014637  | -0.879447 |
| H  | -0.303886 | 3.338178  | -1.198755 |
| H  | 1.011167  | -2.934028 | 1.223414  |
| H  | 0.996179  | 2.650816  | 0.765088  |
| H  | -0.518281 | 3.177218  | 1.019197  |
| H  | -1.046819 | -3.338178 | 0.591014  |
| H  | -1.509687 | -1.658174 | 0.818344  |

|   |           |           |          |
|---|-----------|-----------|----------|
| H | 1.466436  | -1.544818 | 2.843229 |
| H | -0.278412 | -1.317905 | 2.799902 |
| H | -1.056775 | 0.581091  | 0.938265 |
| H | -0.846138 | 1.527800  | 2.397877 |
| H | 1.732447  | 0.421842  | 1.204605 |
| H | 1.334449  | 0.774039  | 2.848556 |

**Zn(L233H)<sup>3+</sup> ( VIII)**

|    |           |           |           |
|----|-----------|-----------|-----------|
| N  | 0.997964  | -0.662500 | 2.307453  |
| C  | 0.997964  | 0.862794  | 2.307453  |
| C  | -0.341697 | -1.387691 | 2.307453  |
| Zn | 1.724391  | -1.506089 | 0.640945  |
| C  | 1.007223  | 1.521610  | 0.904336  |
| N  | -0.032604 | -2.055985 | -0.160856 |
| C  | -0.981268 | -1.519112 | 0.902305  |
| C  | -0.355362 | 2.066608  | 0.410807  |
| C  | -0.380209 | -1.662206 | -1.598690 |
| N  | -0.477214 | 2.155736  | -1.109500 |
| C  | 0.018527  | -0.247616 | -2.075163 |
| C  | -0.990530 | 0.924749  | -1.871293 |
| H  | 1.491287  | -0.953816 | 3.156985  |
| H  | 1.908122  | 1.151018  | 2.836019  |
| H  | 0.152243  | 1.200763  | 2.914383  |
| H  | -1.043256 | -0.867594 | 2.966131  |
| H  | -0.162238 | -2.376304 | 2.741960  |
| H  | 1.434893  | 0.818416  | 0.169677  |
| H  | 1.721550  | 2.349556  | 0.929982  |
| H  | -0.091111 | -3.080639 | -0.140799 |
| H  | -1.341923 | -0.555591 | 0.551034  |
| H  | -1.843890 | -2.186287 | 0.982795  |
| H  | -0.496507 | 3.080639  | 0.792148  |
| H  | -1.210591 | 1.479795  | 0.746696  |
| H  | -1.452534 | -1.838798 | -1.731342 |
| H  | 0.142282  | -2.388331 | -2.225158 |
| H  | -1.150509 | 2.908495  | -1.310165 |
| H  | 0.403889  | 2.487364  | -1.524386 |
| H  | 0.141312  | -0.353923 | -3.156985 |
| H  | 1.028159  | 0.013075  | -1.730669 |
| H  | -1.285997 | 1.314961  | -2.847201 |
| H  | -1.908122 | 0.621814  | -1.363695 |

**Zn(L333)<sup>3+</sup> ( IX)**

|    |           |           |           |
|----|-----------|-----------|-----------|
| N  | -0.244210 | -0.068099 | -2.234824 |
| C  | -0.244210 | 1.457257  | -2.234824 |
| C  | -1.638806 | -0.684809 | -2.234824 |
| Zn | 0.780926  | -0.747552 | -0.677965 |
| C  | 1.001760  | 2.095235  | -1.591284 |
| C  | -1.705249 | -2.107046 | -1.646045 |
| N  | 1.693513  | 0.640364  | 0.398132  |
| N  | -0.104197 | -2.185478 | 0.353883  |
| C  | 1.123392  | 1.974738  | -0.057142 |
| C  | -1.550897 | -2.226463 | -0.115027 |

|   |           |           |           |
|---|-----------|-----------|-----------|
| C | 0.062402  | -1.890193 | 1.837117  |
| C | 1.474190  | 0.337159  | 1.872389  |
| C | 0.147509  | -0.388137 | 2.182097  |
| H | 0.213019  | -0.366632 | -3.098933 |
| H | -1.139474 | 1.775732  | -1.695777 |
| H | -0.347264 | 1.803964  | -3.265807 |
| H | -2.016319 | -0.689110 | -3.260272 |
| H | -2.281498 | -0.016955 | -1.656126 |
| H | 0.944190  | 3.164451  | -1.819985 |
| H | 1.921787  | 1.751810  | -2.082661 |
| H | -1.011041 | -2.783602 | -2.161858 |
| H | -2.701958 | -2.488574 | -1.890821 |
| H | 2.701958  | 0.680966  | 0.241006  |
| H | 0.288869  | -3.112190 | 0.181002  |
| H | 0.144881  | 2.093566  | 0.416571  |
| H | 1.769044  | 2.767005  | 0.330563  |
| H | -1.991223 | -3.164451 | 0.232980  |
| H | -2.081934 | -1.413626 | 0.388145  |
| H | 0.971241  | -2.402134 | 2.164385  |
| H | -0.777447 | -2.342418 | 2.371453  |
| H | 1.514412  | 1.280057  | 2.424470  |
| H | 2.320178  | -0.271018 | 2.203100  |
| H | 0.008999  | -0.317471 | 3.265807  |
| H | -0.705886 | 0.160836  | 1.761343  |

**Zn(L333H)<sup>3+</sup>( X)**

|    |           |           |           |
|----|-----------|-----------|-----------|
| N  | 2.572787  | -0.840916 | -1.245186 |
| C  | 2.572787  | 0.701751  | -1.245186 |
| C  | 1.244621  | -1.599472 | -1.245186 |
| C  | 1.936814  | 1.409701  | -0.025253 |
| C  | 0.665593  | -1.802001 | 0.178334  |
| C  | 0.426729  | 1.721382  | -0.179473 |
| C  | -0.885115 | -1.879624 | 0.219882  |
| N  | -0.316286 | 1.859879  | 1.135155  |
| N  | -1.485752 | -1.237727 | 1.467832  |
| Zn | -0.301058 | 0.176530  | 2.144409  |
| C  | -2.786125 | -0.443171 | 1.200667  |
| C  | -1.841909 | 2.061165  | 0.952390  |
| C  | -2.608703 | 0.849617  | 0.372259  |
| H  | 3.174644  | -1.184502 | -0.485728 |
| H  | 3.071429  | -1.111314 | -2.104701 |
| H  | 2.100285  | 1.002608  | -2.183419 |
| H  | 3.630101  | 0.967915  | -1.310028 |
| H  | 1.437117  | -2.564319 | -1.719533 |
| H  | 0.573894  | -1.039275 | -1.899117 |
| H  | 2.483786  | 2.349518  | 0.093956  |
| H  | 2.152892  | 0.849597  | 0.895449  |
| H  | 1.009175  | -0.953470 | 0.796291  |
| H  | 1.109058  | -2.687659 | 0.642499  |
| H  | -0.088144 | 0.945547  | -0.747278 |
| H  | 0.292165  | 2.656704  | -0.732208 |
| H  | -1.223200 | -2.917532 | 0.179323  |
| H  | -1.317779 | -1.364448 | -0.638326 |

|   |           |           |           |
|---|-----------|-----------|-----------|
| H | 0.040813  | 2.682582  | 1.632303  |
| H | -1.716096 | -1.975498 | 2.140117  |
| H | -3.220194 | -0.233315 | 2.183419  |
| H | -3.476328 | -1.110986 | 0.677563  |
| H | -1.977302 | 2.917532  | 0.285659  |
| H | -2.230188 | 2.350211  | 1.934157  |
| H | -3.630101 | 1.220307  | 0.223113  |
| H | -2.265517 | 0.621594  | -0.641142 |

**B3LYP/LanL2DZ  
Cd(L222)<sup>2+</sup>(I)**

|    |           |           |           |
|----|-----------|-----------|-----------|
| N  | 0.572898  | -0.768064 | -1.772540 |
| C  | 0.572898  | 0.754003  | -1.772540 |
| C  | -0.812355 | -1.400490 | -1.772540 |
| Cd | 1.360066  | -1.427639 | 0.271789  |
| C  | 1.443495  | 1.402245  | -0.663276 |
| N  | 1.218918  | 0.810795  | 0.721758  |
| N  | -0.861253 | -1.379031 | 0.815468  |
| C  | -1.624912 | -1.131989 | -0.477813 |
| C  | -0.168388 | 1.056187  | 1.297502  |
| C  | -0.896664 | -0.218857 | 1.801115  |
| H  | 1.085599  | -1.114577 | -2.589463 |
| H  | -0.463082 | 1.095301  | -1.694535 |
| H  | 0.947414  | 1.117800  | -2.735473 |
| H  | -0.674759 | -2.477810 | -1.925447 |
| H  | -1.398687 | -1.021662 | -2.619626 |
| H  | 1.224850  | 2.477810  | -0.652947 |
| H  | 2.509607  | 1.286989  | -0.893551 |
| H  | 1.929449  | 1.191739  | 1.354436  |
| H  | -1.231466 | -2.212069 | 1.283724  |
| H  | -1.992857 | -0.102215 | -0.464130 |
| H  | -2.509607 | -1.777166 | -0.507233 |
| H  | -0.768308 | 1.564798  | 0.537609  |
| H  | -0.093523 | 1.745089  | 2.145809  |
| H  | -1.936251 | 0.055616  | 2.021743  |
| H  | -0.446870 | -0.576023 | 2.735473  |

**Cd(L222H)<sup>3+</sup>(II)**

|    |           |           |           |
|----|-----------|-----------|-----------|
| C  | 1.585494  | -1.035486 | 0.823843  |
| C  | 1.585494  | 0.532996  | 0.823843  |
| N  | 0.205158  | -1.689217 | 0.823843  |
| N  | 0.357333  | 1.200799  | 1.453102  |
| C  | -0.475993 | -1.852641 | -0.549058 |
| Cd | -0.693061 | -0.499867 | 2.574232  |
| C  | -0.556956 | 1.950090  | 0.477642  |
| C  | -0.319560 | -0.719336 | -1.580610 |
| C  | -1.684024 | 1.157721  | -0.220414 |
| N  | -1.355987 | 0.433288  | -1.541098 |
| H  | 2.105073  | -1.408534 | 1.716240  |
| H  | 2.170363  | -1.384242 | -0.036248 |
| H  | 1.699656  | 0.928033  | -0.188673 |

|   |           |           |           |
|---|-----------|-----------|-----------|
| H | 2.471547  | 0.859321  | 1.379041  |
| H | 0.328935  | -2.654001 | 1.165805  |
| H | 0.697472  | 1.910753  | 2.117096  |
| H | -1.525184 | -2.126163 | -0.385830 |
| H | -0.004478 | -2.728841 | -1.016455 |
| H | 0.071521  | 2.479763  | -0.252079 |
| H | -1.059521 | 2.728841  | 1.064685  |
| H | -0.445375 | -1.166492 | -2.574232 |
| H | 0.672190  | -0.266724 | -1.570572 |
| H | -2.471547 | 1.875558  | -0.482873 |
| H | -2.158965 | 0.411521  | 0.431403  |
| H | -1.050982 | 1.137165  | -2.237223 |
| H | -2.253142 | 0.065568  | -1.904829 |

### **Cd(L223)<sup>2+</sup>(III)**

|    |           |           |           |
|----|-----------|-----------|-----------|
| N  | 0.600918  | -0.233795 | 1.907341  |
| C  | 0.600918  | 1.304556  | 1.907341  |
| C  | -0.798910 | -0.845481 | 1.907341  |
| Cd | 1.520976  | -0.947253 | -0.050110 |
| C  | 0.920711  | 1.981475  | 0.550771  |
| N  | 0.533440  | 0.480271  | -1.503915 |
| C  | -0.922380 | -2.191567 | 1.156066  |
| N  | -0.443238 | -2.110883 | -0.284292 |
| C  | 0.017554  | 1.660298  | -0.671411 |
| C  | -1.320877 | -1.267131 | -1.195107 |
| C  | -0.534451 | -0.363611 | -2.179192 |
| H  | 1.091768  | -0.550841 | 2.750209  |
| H  | 1.352385  | 1.631737  | 2.633713  |
| H  | -0.372577 | 1.644870  | 2.279755  |
| H  | -1.477409 | -0.106425 | 1.473399  |
| H  | -1.128510 | -1.003099 | 2.940952  |
| H  | 1.979702  | 1.815007  | 0.279250  |
| H  | 0.859400  | 3.061300  | 0.739966  |
| H  | 1.157757  | 0.847591  | -2.230770 |
| H  | -1.976037 | -2.497956 | 1.191341  |
| H  | -0.338484 | -2.975104 | 1.653849  |
| H  | -0.367946 | -3.061300 | -0.660132 |
| H  | -0.038389 | 2.537448  | -1.325294 |
| H  | -1.006352 | 1.435204  | -0.357218 |
| H  | -1.979702 | -0.660678 | -0.567601 |
| H  | -1.970547 | -1.919569 | -1.789407 |
| H  | -1.255913 | 0.280660  | -2.698098 |
| H  | -0.032306 | -0.971842 | -2.940952 |

### **Cd(L223H)<sup>3+</sup>(IV)**

|    |           |           |          |
|----|-----------|-----------|----------|
| N  | 0.772263  | -0.544004 | 1.796966 |
| C  | 0.772263  | 1.015055  | 1.796966 |
| C  | -0.598844 | -1.229953 | 1.796966 |
| Cd | 2.190284  | -1.034707 | 0.090213 |
| C  | 1.781951  | 1.664728  | 0.816969 |

|   |           |           |           |
|---|-----------|-----------|-----------|
| N | 1.271019  | 0.399728  | -1.415021 |
| C | -1.093770 | -1.851285 | 0.470140  |
| N | -1.944578 | -0.964707 | -0.461367 |
| C | 1.430453  | 1.764254  | -0.687130 |
| C | -0.126524 | 0.146839  | -2.013493 |
| C | -1.347772 | 0.319543  | -1.082384 |
| H | 1.216014  | -0.826680 | 2.682554  |
| H | 1.014562  | 1.336214  | 2.815437  |
| H | -0.246284 | 1.358536  | 1.596089  |
| H | -1.341368 | -0.543409 | 2.225358  |
| H | -0.527034 | -2.066936 | 2.501559  |
| H | 2.796809  | 1.224308  | 0.959351  |
| H | 1.937882  | 2.698166  | 1.160661  |
| H | 1.888181  | 0.428469  | -2.240590 |
| H | -1.744756 | -2.698166 | 0.720975  |
| H | -0.279399 | -2.265212 | -0.139617 |
| H | -2.796809 | -0.680008 | 0.053778  |
| H | -2.282959 | -1.569559 | -1.230711 |
| H | 2.231115  | 2.313137  | -1.194941 |
| H | 0.515109  | 2.347060  | -0.832515 |
| H | -0.249338 | 0.886974  | -2.815437 |
| H | -0.115328 | -0.832467 | -2.508727 |
| H | -1.168069 | 1.017578  | -0.263912 |
| H | -2.167056 | 0.738414  | -1.678377 |

**Cd(L223H)<sup>3+</sup>(V)**

|    |           |           |           |
|----|-----------|-----------|-----------|
| N  | 0.952742  | -0.353784 | 2.008918  |
| C  | 0.952742  | 1.185670  | 2.008918  |
| C  | -0.428923 | -1.020799 | 2.008918  |
| Cd | 1.961634  | -1.154972 | 0.143270  |
| C  | 0.741687  | 1.855556  | 0.626426  |
| C  | -0.632573 | -2.121501 | 0.931009  |
| N  | -0.193820 | -1.712657 | -0.482344 |
| C  | -0.737223 | 2.017290  | 0.168357  |
| C  | -1.189103 | -0.797074 | -1.217228 |
| N  | -0.959117 | 1.808004  | -1.345566 |
| C  | -0.597589 | 0.431480  | -1.958807 |
| H  | 1.451077  | -0.647125 | 2.861132  |
| H  | 1.929468  | 1.490891  | 2.399773  |
| H  | 0.200425  | 1.528611  | 2.731536  |
| H  | -1.184643 | -0.239413 | 1.915615  |
| H  | -0.592576 | -1.492841 | 2.984431  |
| H  | 1.344626  | 1.328277  | -0.141740 |
| H  | 1.200719  | 2.850124  | 0.684417  |
| H  | -1.693877 | -2.399835 | 0.928337  |
| H  | -0.073898 | -3.031750 | 1.192001  |
| H  | -0.125083 | -2.576296 | -1.038436 |
| H  | -1.090307 | 3.031750  | 0.384027  |
| H  | -1.420603 | 1.332941  | 0.670829  |
| H  | -1.961634 | -0.498913 | -0.501120 |
| H  | -1.694773 | -1.422226 | -1.961531 |
| H  | -1.958882 | 1.996436  | -1.536616 |



|   |           |          |           |
|---|-----------|----------|-----------|
| H | -0.439003 | 2.532217 | -1.871317 |
| H | -0.981129 | 0.468165 | -2.984431 |
| H | 0.492989  | 0.385950 | -2.040936 |

**Cd(L233)<sup>2+</sup>(VI)**

|    |           |           |           |
|----|-----------|-----------|-----------|
| N  | 0.539568  | -0.306844 | 2.398501  |
| C  | 0.539568  | 1.215850  | 2.398501  |
| C  | -0.859573 | -0.943394 | 2.398501  |
| Cd | 1.614009  | -0.809576 | 0.461979  |
| C  | -1.068244 | -2.119028 | 1.411062  |
| N  | 1.149658  | 1.359118  | -0.081700 |
| C  | 0.195885  | 1.809315  | 1.013624  |
| N  | 0.132892  | -1.832140 | -0.872051 |
| C  | -1.190611 | -1.759027 | -0.094953 |
| C  | 0.084789  | -1.130167 | -2.239220 |
| C  | 0.561287  | 1.383396  | -1.500995 |
| C  | 0.943223  | 0.152295  | -2.362378 |
| H  | 1.035152  | -0.624631 | 3.238299  |
| H  | 1.531019  | 1.548896  | 2.729690  |
| H  | -0.190590 | 1.591753  | 3.126245  |
| H  | -1.586794 | -0.152131 | 2.184608  |
| H  | -1.064757 | -1.296906 | 3.414935  |
| H  | -2.014183 | -2.591145 | 1.706514  |
| H  | -0.309009 | -2.902749 | 1.568231  |
| H  | 1.975538  | 1.968017  | -0.068388 |
| H  | 0.192830  | 2.902749  | 1.094873  |
| H  | -0.813794 | 1.509166  | 0.715490  |
| H  | 0.337809  | -2.825517 | -1.030403 |
| H  | -1.586014 | -0.744425 | -0.218283 |
| H  | -1.900995 | -2.436964 | -0.582388 |
| H  | 0.433697  | -1.845786 | -2.991043 |
| H  | -0.963530 | -0.907330 | -2.470743 |
| H  | -0.527432 | 1.469298  | -1.416555 |
| H  | 0.912379  | 2.291802  | -2.001723 |
| H  | 0.870191  | 0.458140  | -3.414935 |
| H  | 2.014183  | -0.086933 | -2.222803 |

**Cd(L233H)<sup>3+</sup>(VII)**

|    |           |           |           |
|----|-----------|-----------|-----------|
| N  | 0.518838  | -0.070114 | 1.914764  |
| C  | 0.518838  | 1.482358  | 1.914764  |
| C  | -0.861923 | -0.783183 | 1.914764  |
| Cd | 1.767966  | -1.333603 | 0.479229  |
| C  | -0.862364 | -2.187007 | 1.253089  |
| C  | -0.561576 | 2.290347  | 1.164479  |
| N  | 0.317910  | -1.980537 | -1.093273 |
| N  | -0.450164 | 2.473797  | -0.371485 |
| C  | -0.979668 | -2.285872 | -0.291724 |
| C  | 0.214873  | -0.951211 | -2.227619 |
| C  | -0.808658 | 1.251612  | -1.252443 |
| C  | 0.442910  | 0.522650  | -1.803361 |

|   |           |           |           |
|---|-----------|-----------|-----------|
| H | 0.943280  | -0.296260 | 2.827740  |
| H | 1.525237  | 1.812755  | 1.631979  |
| H | 0.383822  | 1.788842  | 2.961496  |
| H | -1.585530 | -0.143560 | 1.407168  |
| H | -1.189697 | -0.873546 | 2.956417  |
| H | -1.743998 | -2.709654 | 1.652033  |
| H | -0.028475 | -2.815087 | 1.633778  |
| H | -0.493571 | 3.306749  | 1.573143  |
| H | -1.579882 | 1.944345  | 1.359077  |
| H | 0.608063  | -2.863183 | -1.537265 |
| H | 0.484695  | 2.835638  | -0.620222 |
| H | -1.111248 | 3.234633  | -0.606769 |
| H | -1.767966 | -1.623095 | -0.661414 |
| H | -1.280620 | -3.306749 | -0.548481 |
| H | 0.981291  | -1.222219 | -2.961496 |
| H | -0.755980 | -1.073878 | -2.725309 |
| H | -1.449386 | 0.614683  | -0.641684 |
| H | -1.414380 | 1.622094  | -2.085704 |
| H | 0.807126  | 1.061614  | -2.687322 |
| H | 1.281584  | 0.580206  | -1.077819 |

### Cd(L233H)<sup>3+</sup>(VIII)

|    |           |           |           |
|----|-----------|-----------|-----------|
| N  | 1.083507  | -0.774339 | -2.290998 |
| C  | 1.083507  | 0.762793  | -2.290998 |
| C  | -0.278997 | -1.467376 | -2.290998 |
| Cd | 1.989446  | -1.827965 | -0.486409 |
| C  | 1.055148  | 1.440703  | -0.887457 |
| N  | -0.166987 | -2.107276 | 0.223506  |
| C  | -0.981857 | -1.487265 | -0.910871 |
| C  | -0.298835 | 2.102630  | -0.503955 |
| C  | -0.582849 | -1.626147 | 1.629780  |
| N  | -0.529608 | 2.212601  | 1.022026  |
| C  | -0.162660 | -0.193822 | 2.059168  |
| C  | -1.148704 | 0.979146  | 1.737156  |
| H  | 1.569958  | -1.063646 | -3.151666 |
| H  | 0.243634  | 1.096669  | -2.915269 |
| H  | 1.999675  | 1.059562  | -2.810500 |
| H  | -0.130286 | -2.486777 | -2.672095 |
| H  | -0.945744 | -0.961659 | -3.001017 |
| H  | 1.833674  | 2.212550  | -0.868323 |
| H  | 1.353738  | 0.706897  | -0.122407 |
| H  | -0.343865 | -3.123714 | 0.221854  |
| H  | -1.239898 | -0.474780 | -0.606876 |
| H  | -1.919764 | -2.044906 | -1.023437 |
| H  | -1.169401 | 1.574911  | -0.902180 |
| H  | -0.332732 | 3.123714  | -0.898747 |
| H  | -0.135316 | -2.340392 | 2.328878  |
| H  | -1.672154 | -1.748056 | 1.708302  |
| H  | -1.193503 | 2.992450  | 1.169011  |
| H  | 0.341425  | 2.497214  | 1.498732  |
| H  | 0.861311  | 0.029394  | 1.724153  |
| H  | -0.079798 | -0.241138 | 3.151666  |

|   |           |          |          |
|---|-----------|----------|----------|
| H | -1.999675 | 0.672961 | 1.122255 |
| H | -1.559058 | 1.372158 | 2.672893 |

**Cd(L333)<sup>2+</sup>( IX)**

|    |           |           |           |
|----|-----------|-----------|-----------|
| N  | -0.085912 | -0.109970 | 2.249567  |
| C  | -0.085912 | 1.430678  | 2.249567  |
| C  | -1.493752 | -0.732435 | 2.249567  |
| Cd | 1.070657  | -0.888207 | 0.488332  |
| C  | 1.049923  | 2.098975  | 1.435411  |
| C  | -1.605869 | -2.119490 | 1.566834  |
| N  | 1.536656  | 0.877830  | -0.798641 |
| N  | -0.328476 | -2.166719 | -0.696658 |
| C  | 0.898618  | 2.090867  | -0.110312 |
| C  | -1.686780 | -2.123488 | 0.016219  |
| C  | -0.384350 | -1.644354 | -2.137688 |
| C  | 0.999336  | 0.628909  | -2.212706 |
| C  | -0.368056 | -0.100064 | -2.284145 |
| H  | 0.377708  | -0.413039 | 3.114992  |
| H  | -0.032114 | 1.773958  | 3.288846  |
| H  | -1.053515 | 1.757249  | 1.854305  |
| H  | -2.161072 | -0.026020 | 1.744895  |
| H  | -1.834298 | -0.811109 | 3.288394  |
| H  | 2.037742  | 1.711783  | 1.736125  |
| H  | 1.061341  | 3.151058  | 1.749028  |
| H  | -2.543340 | -2.559782 | 1.930838  |
| H  | -0.821968 | -2.807270 | 1.925051  |
| H  | 2.543340  | 1.067124  | -0.880754 |
| H  | -0.036454 | -3.151058 | -0.738131 |
| H  | 1.357125  | 2.993968  | -0.530357 |
| H  | -0.160635 | 2.111822  | -0.388894 |
| H  | -2.215658 | -1.230537 | -0.333874 |
| H  | -2.267710 | -2.990784 | -0.319106 |
| H  | -1.298380 | -2.035676 | -2.602071 |
| H  | 0.464426  | -2.083811 | -2.675793 |
| H  | 1.761809  | 0.054821  | -2.753086 |
| H  | 0.910393  | 1.600611  | -2.715032 |
| H  | -1.097802 | 0.367097  | -1.605923 |
| H  | -0.759763 | 0.105485  | -3.288846 |

**Cd(L333H)<sup>3+</sup>( X)**

|    |           |           |           |
|----|-----------|-----------|-----------|
| N  | 0.998301  | -0.403532 | 2.289160  |
| C  | 0.998301  | 1.155791  | 2.289160  |
| C  | -0.385504 | -1.084857 | 2.289160  |
| Cd | 2.421199  | -0.905159 | 0.633900  |
| C  | 0.730925  | 1.912333  | 0.957457  |
| C  | -1.200894 | -0.876428 | 0.979445  |
| N  | 1.913329  | 0.560326  | -0.989947 |
| C  | 1.758386  | 1.896616  | -0.205522 |
| C  | -1.645515 | -2.165080 | 0.242000  |
| C  | 0.688749  | 0.172748  | -1.828531 |
| N  | -2.032730 | -1.824608 | -1.220566 |

|   |           |           |           |
|---|-----------|-----------|-----------|
| C | 0.486998  | -1.367268 | -1.917442 |
| C | -0.911364 | -1.905321 | -2.304914 |
| H | 1.422415  | -0.672839 | 3.190683  |
| H | 1.972928  | 1.451336  | 2.701241  |
| H | 0.239244  | 1.471647  | 3.016371  |
| H | -0.936764 | -0.675521 | 3.144533  |
| H | -0.213328 | -2.146398 | 2.503183  |
| H | 0.701201  | 2.969076  | 1.264200  |
| H | -0.282578 | 1.723570  | 0.590113  |
| H | -0.609519 | -0.271392 | 0.294285  |
| H | -2.094201 | -0.284132 | 1.213616  |
| H | 2.708016  | 0.688662  | -1.632917 |
| H | 2.762757  | 2.162048  | 0.150911  |
| H | 1.466724  | 2.667193  | -0.929985 |
| H | -2.530618 | -2.606603 | 0.711009  |
| H | -0.875872 | -2.941845 | 0.194528  |
| H | 0.821731  | 0.585099  | -2.836180 |
| H | -0.175969 | 0.680790  | -1.395069 |
| H | -2.480903 | -0.895714 | -1.240639 |
| H | -2.762757 | -2.490948 | -1.525259 |
| H | 0.782901  | -1.852112 | -0.964579 |
| H | 1.167294  | -1.777061 | -2.675771 |
| H | -1.308630 | -1.396630 | -3.190683 |
| H | -0.820858 | -2.969076 | -2.545719 |

**B3LYP/DZVP**  
**Cd(L222)<sup>2+</sup>(I)**

|    |           |           |           |
|----|-----------|-----------|-----------|
| N  | 0.560895  | -0.760983 | -1.752926 |
| C  | 0.560895  | 0.747334  | -1.752926 |
| C  | -0.808546 | -1.387289 | -1.752926 |
| Cd | 1.397332  | -1.468717 | 0.279362  |
| C  | 1.429057  | 1.385583  | -0.648829 |
| N  | 1.208638  | 0.793013  | 0.717800  |
| N  | -0.847931 | -1.375190 | 0.812414  |
| C  | -1.615385 | -1.131531 | -0.462938 |
| C  | -0.164187 | 1.038629  | 1.291282  |
| C  | -0.882113 | -0.231462 | 1.791201  |
| H  | 1.048612  | -1.093054 | -2.586080 |
| H  | -0.472424 | 1.088997  | -1.675372 |
| H  | 0.932188  | 1.109739  | -2.715154 |
| H  | -0.664288 | -2.461614 | -1.905057 |
| H  | -1.396206 | -1.013080 | -2.598751 |
| H  | 1.222075  | 2.461614  | -0.634252 |
| H  | 2.491505  | 1.260009  | -0.880428 |
| H  | 1.907281  | 1.195912  | 1.343828  |
| H  | -1.237548 | -2.192904 | 1.283501  |
| H  | -1.996624 | -0.109329 | -0.444826 |
| H  | -2.491505 | -1.784832 | -0.488233 |
| H  | -0.764623 | 1.545525  | 0.534276  |
| H  | -0.087641 | 1.729879  | 2.134767  |
| H  | -1.918525 | 0.035482  | 2.026729  |
| H  | -0.419256 | -0.592324 | 2.715154  |

### Cd(L222H)<sup>3+</sup>(II)

|    |           |           |           |
|----|-----------|-----------|-----------|
| C  | 1.567460  | -1.030830 | 0.767636  |
| C  | 1.567460  | 0.528121  | 0.767636  |
| N  | 0.202711  | -1.673932 | 0.767636  |
| N  | 0.364893  | 1.180218  | 1.421257  |
| C  | -0.472164 | -1.838098 | -0.588099 |
| Cd | -0.681641 | -0.531621 | 2.596054  |
| C  | -0.554787 | 1.938724  | 0.486344  |
| C  | -0.358478 | -0.699460 | -1.606469 |
| C  | -1.683019 | 1.163366  | -0.210028 |
| N  | -1.380570 | 0.441356  | -1.520155 |
| H  | 2.077209  | -1.397989 | 1.665515  |
| H  | 2.159431  | -1.384584 | -0.084138 |
| H  | 1.660822  | 0.928754  | -0.242447 |
| H  | 2.462052  | 0.853021  | 1.305484  |
| H  | 0.342794  | -2.637978 | 1.089481  |
| H  | 0.725195  | 1.886692  | 2.071138  |
| H  | -1.510180 | -2.141838 | -0.422297 |
| H  | 0.020199  | -2.691956 | -1.069544 |
| H  | 0.055416  | 2.494401  | -0.236034 |
| H  | -1.059155 | 2.691956  | 1.099979  |
| H  | -0.525883 | -1.136246 | -2.596054 |
| H  | 0.630325  | -0.246330 | -1.636969 |
| H  | -2.462052 | 1.887380  | -0.470581 |
| H  | -2.165319 | 0.425799  | 0.441627  |
| H  | -1.108331 | 1.142890  | -2.228012 |
| H  | -2.284824 | 0.084176  | -1.867837 |
| N  | 0.605980  | -0.214778 | 1.882592  |
| C  | 0.605980  | 1.307504  | 1.882592  |
| C  | -0.781093 | -0.818141 | 1.882592  |
| Cd | 1.583947  | -0.969188 | -0.051670 |
| C  | 0.907035  | 1.980511  | 0.529890  |
| N  | 0.541154  | 0.462366  | -1.491688 |
| C  | -0.903521 | -2.163905 | 1.149252  |
| N  | -0.420919 | -2.102102 | -0.273994 |
| C  | 0.021904  | 1.642327  | -0.689708 |
| C  | -1.290189 | -1.282810 | -1.193200 |
| C  | -0.505348 | -0.380441 | -2.165832 |
| H  | 1.072766  | -0.518649 | 2.738608  |
| H  | 1.367841  | 1.631300  | 2.595653  |
| H  | -0.357698 | 1.648102  | 2.273088  |
| H  | -1.455507 | -0.084861 | 1.439166  |
| H  | -1.115903 | -0.960029 | 2.914775  |
| H  | 1.966127  | 1.832825  | 0.260800  |
| H  | 0.828547  | 3.057834  | 0.714922  |
| H  | 1.150031  | 0.831811  | -2.224497 |
| H  | -1.954997 | -2.471287 | 1.185011  |
| H  | -0.320397 | -2.939262 | 1.656199  |
| H  | -0.370169 | -3.057834 | -0.629413 |
| H  | -0.028337 | 2.506284  | -1.358070 |
| H  | -1.003957 | 1.424267  | -0.385976 |
| H  | -1.966127 | -0.683641 | -0.581498 |

|   |           |           |           |
|---|-----------|-----------|-----------|
| H | -1.922397 | -1.947608 | -1.788821 |
| H | -1.222069 | 0.254772  | -2.698355 |
| H | 0.011256  | -0.988650 | -2.914775 |

**Cd(L223)<sup>2+</sup>( III)**

|    |           |           |           |
|----|-----------|-----------|-----------|
| N  | 0.605980  | -0.214778 | 1.882592  |
| C  | 0.605980  | 1.307504  | 1.882592  |
| C  | -0.781093 | -0.818141 | 1.882592  |
| Cd | 1.583947  | -0.969188 | -0.051670 |
| C  | 0.907035  | 1.980511  | 0.529890  |
| N  | 0.541154  | 0.462366  | -1.491688 |
| C  | -0.903521 | -2.163905 | 1.149252  |
| N  | -0.420919 | -2.102102 | -0.273994 |
| C  | 0.021904  | 1.642327  | -0.689708 |
| C  | -1.290189 | -1.282810 | -1.193200 |
| C  | -0.505348 | -0.380441 | -2.165832 |
| H  | 1.072766  | -0.518649 | 2.738608  |
| H  | 1.367841  | 1.631300  | 2.595653  |
| H  | -0.357698 | 1.648102  | 2.273088  |
| H  | -1.455507 | -0.084861 | 1.439166  |
| H  | -1.115903 | -0.960029 | 2.914775  |
| H  | 1.966127  | 1.832825  | 0.260800  |
| H  | 0.828547  | 3.057834  | 0.714922  |
| H  | 1.150031  | 0.831811  | -2.224497 |
| H  | -1.954997 | -2.471287 | 1.185011  |
| H  | -0.320397 | -2.939262 | 1.656199  |
| H  | -0.370169 | -3.057834 | -0.629413 |
| H  | -0.028337 | 2.506284  | -1.358070 |
| H  | -1.003957 | 1.424267  | -0.385976 |
| H  | -1.966127 | -0.683641 | -0.581498 |
| H  | -1.922397 | -1.947608 | -1.788821 |
| H  | -1.222069 | 0.254772  | -2.698355 |
| H  | 0.011256  | -0.988650 | -2.914775 |

**Cd(L223H)<sup>3+</sup>( IV)**

|    |           |           |           |
|----|-----------|-----------|-----------|
| N  | 0.743189  | -0.561779 | 1.785254  |
| C  | 0.743189  | 0.979775  | 1.785254  |
| C  | -0.612216 | -1.240820 | 1.785254  |
| Cd | 2.218231  | -1.121570 | 0.110856  |
| C  | 1.769089  | 1.622428  | 0.834022  |
| N  | 1.298183  | 0.361825  | -1.381282 |
| C  | -1.116835 | -1.837734 | 0.461346  |
| N  | -1.916183 | -0.943103 | -0.482271 |
| C  | 1.464009  | 1.714514  | -0.669981 |
| C  | -0.071254 | 0.130087  | -2.007814 |
| C  | -1.312881 | 0.311567  | -1.119230 |
| H  | 1.165830  | -0.832143 | 2.678981  |
| H  | 0.960048  | 1.300213  | 2.807467  |
| H  | -0.268997 | 1.321811  | 1.563068  |
| H  | -1.352402 | -0.569858 | 2.236065  |
| H  | -0.530348 | -2.094208 | 2.464937  |

|   |           |           |           |
|---|-----------|-----------|-----------|
| H | 2.774470  | 1.178721  | 1.003192  |
| H | 1.922574  | 2.654609  | 1.177089  |
| H | 1.919049  | 0.393215  | -2.197448 |
| H | -1.803164 | -2.654609 | 0.707209  |
| H | -0.316661 | -2.289022 | -0.135864 |
| H | -2.774470 | -0.642587 | 0.007486  |
| H | -2.268151 | -1.550678 | -1.239339 |
| H | 2.290357  | 2.238051  | -1.158309 |
| H | 0.569632  | 2.316664  | -0.849505 |
| H | -0.167404 | 0.873229  | -2.807467 |
| H | -0.059050 | -0.844865 | -2.505777 |
| H | -1.170658 | 1.036712  | -0.320145 |
| H | -2.118388 | 0.699834  | -1.749644 |

**Cd(L223H)<sup>3+</sup>( V)**

|    |           |           |           |
|----|-----------|-----------|-----------|
| N  | 0.903766  | -0.347851 | 1.996827  |
| C  | 0.903766  | 1.173510  | 1.996827  |
| C  | -0.462897 | -1.008478 | 1.996827  |
| Cd | 1.987902  | -1.212670 | 0.169315  |
| C  | 0.691277  | 1.845039  | 0.625697  |
| C  | -0.653467 | -2.115548 | 0.937690  |
| N  | -0.205875 | -1.731190 | -0.457827 |
| C  | -0.773577 | 1.995126  | 0.142725  |
| C  | -1.185705 | -0.847463 | -1.220829 |
| N  | -0.974371 | 1.744507  | -1.351035 |
| C  | -0.602101 | 0.383860  | -1.949419 |
| H  | 1.380680  | -0.627228 | 2.860646  |
| H  | 1.882830  | 1.475238  | 2.377905  |
| H  | 0.161058  | 1.514949  | 2.727239  |
| H  | -1.217971 | -0.232011 | 1.887528  |
| H  | -0.633180 | -1.465864 | 2.976034  |
| H  | 1.311169  | 1.336969  | -0.134656 |
| H  | 1.136039  | 2.843200  | 0.694223  |
| H  | -1.710382 | -2.405173 | 0.931406  |
| H  | -0.088639 | -3.014385 | 1.215716  |
| H  | -0.149276 | -2.606603 | -0.986805 |
| H  | -1.130174 | 3.014385  | 0.314569  |
| H  | -1.472386 | 1.334253  | 0.650773  |
| H  | -1.987902 | -0.562721 | -0.536250 |
| H  | -1.652302 | -1.484600 | -1.976525 |
| H  | -1.968976 | 1.928607  | -1.556775 |
| H  | -0.472494 | 2.467171  | -1.891095 |
| H  | -0.976508 | 0.421098  | -2.976034 |
| H  | 0.486589  | 0.350002  | -2.025347 |

**Cd(L233)<sup>2+</sup>( VI)**

|    |           |           |          |
|----|-----------|-----------|----------|
| N  | 0.541073  | -0.303964 | 2.387184 |
| C  | 0.541073  | 1.202556  | 2.387184 |
| C  | -0.843252 | -0.938427 | 2.387184 |
| Cd | 1.670441  | -0.830301 | 0.474712 |
| C  | -1.059310 | -2.090696 | 1.388062 |

|   |           |           |           |
|---|-----------|-----------|-----------|
| N | 1.145621  | 1.343891  | -0.073011 |
| C | 0.203201  | 1.794923  | 1.010125  |
| N | 0.142935  | -1.796652 | -0.872481 |
| C | -1.167471 | -1.719240 | -0.108055 |
| C | 0.099665  | -1.106535 | -2.228386 |
| C | 0.572224  | 1.395217  | -1.481317 |
| C | 0.941010  | 0.176675  | -2.349693 |
| H | 1.017057  | -0.604204 | 3.239226  |
| H | 1.532858  | 1.529553  | 2.716215  |
| H | -0.184490 | 1.579665  | 3.116217  |
| H | -1.573020 | -0.147309 | 2.196209  |
| H | -1.038246 | -1.306899 | 3.397646  |
| H | -2.012031 | -2.550831 | 1.672542  |
| H | -0.316554 | -2.886796 | 1.541768  |
| H | 1.959684  | 1.961003  | -0.053450 |
| H | 0.201823  | 2.886796  | 1.088814  |
| H | -0.805503 | 1.498785  | 0.713529  |
| H | 0.322458  | -2.788648 | -1.040177 |
| H | -1.552667 | -0.702703 | -0.224834 |
| H | -1.881004 | -2.382408 | -0.606846 |
| H | 0.464027  | -1.820163 | -2.971021 |
| H | -0.947044 | -0.901284 | -2.472298 |
| H | -0.512935 | 1.495865  | -1.402787 |
| H | 0.936349  | 2.304776  | -1.965328 |
| H | 0.855527  | 0.487423  | -3.397646 |
| H | 2.012031  | -0.057532 | -2.225997 |

**Cd(L233H)<sup>3+</sup>( VII)**

|    |           |           |           |
|----|-----------|-----------|-----------|
| N  | 0.460910  | -0.049036 | 1.870961  |
| C  | 0.460910  | 1.485092  | 1.870961  |
| C  | -0.906207 | -0.748406 | 1.870961  |
| Cd | 1.798528  | -1.361535 | 0.519512  |
| C  | -0.904748 | -2.156161 | 1.243170  |
| C  | -0.572477 | 2.295062  | 1.074937  |
| N  | 0.318093  | -2.000205 | -1.062356 |
| N  | -0.435200 | 2.433752  | -0.446475 |
| C  | -0.981698 | -2.291304 | -0.291355 |
| C  | 0.245003  | -1.009664 | -2.210033 |
| C  | -0.785467 | 1.218995  | -1.312863 |
| C  | 0.459782  | 0.467133  | -1.821614 |
| H  | 0.857355  | -0.259125 | 2.793645  |
| H  | 1.477588  | 1.814650  | 1.638847  |
| H  | 0.272451  | 1.795526  | 2.905336  |
| H  | -1.617779 | -0.118383 | 1.339616  |
| H  | -1.250287 | -0.810406 | 2.907505  |
| H  | -1.798528 | -2.662534 | 1.631018  |
| H  | -0.088327 | -2.780049 | 1.657784  |
| H  | -0.479842 | 3.318107  | 1.454208  |
| H  | -1.603156 | 1.989553  | 1.259274  |
| H  | 0.600531  | -2.887341 | -1.491146 |
| H  | 0.497059  | 2.798120  | -0.690761 |
| H  | -1.076577 | 3.198877  | -0.707718 |



|   |           |           |           |
|---|-----------|-----------|-----------|
| H | -1.764665 | -1.646158 | -0.695733 |
| H | -1.268728 | -3.318107 | -0.530874 |
| H | 1.036691  | -1.294462 | -2.907505 |
| H | -0.705421 | -1.151010 | -2.736876 |
| H | -1.455105 | 0.606724  | -0.711856 |
| H | -1.364748 | 1.592251  | -2.160713 |
| H | 0.843923  | 0.983178  | -2.708377 |
| H | 1.284171  | 0.541396  | -1.087364 |

**Cd(L233H)<sup>3+</sup> (VIII)**

|    |           |           |           |
|----|-----------|-----------|-----------|
| N  | 1.100693  | -0.780578 | -2.279363 |
| C  | 1.100693  | 0.738939  | -2.279363 |
| C  | -0.241570 | -1.472192 | -2.279363 |
| Cd | 2.053068  | -1.865352 | -0.484874 |
| C  | 1.019087  | 1.406879  | -0.881419 |
| N  | -0.144704 | -2.084518 | 0.220027  |
| C  | -0.947551 | -1.488152 | -0.911478 |
| C  | -0.332025 | 2.072542  | -0.533324 |
| C  | -0.588286 | -1.623455 | 1.604339  |
| N  | -0.591825 | 2.181009  | 0.969961  |
| C  | -0.218076 | -0.193341 | 2.055722  |
| C  | -1.191741 | 0.973926  | 1.709447  |
| H  | 1.568364  | -1.060117 | -3.148331 |
| H  | 0.291444  | 1.073662  | -2.938757 |
| H  | 2.037924  | 1.031212  | -2.756814 |
| H  | -0.079624 | -2.492992 | -2.644876 |
| H  | -0.907575 | -0.983074 | -2.999404 |
| H  | 1.800726  | 2.170585  | -0.822918 |
| H  | 1.283188  | 0.668741  | -0.114027 |
| H  | -0.327112 | -3.094880 | 0.216769  |
| H  | -1.214891 | -0.476779 | -0.619766 |
| H  | -1.881571 | -2.049508 | -1.022556 |
| H  | -1.199205 | 1.559064  | -0.950657 |
| H  | -0.351793 | 3.094880  | -0.919924 |
| H  | -0.130325 | -2.325868 | 2.304696  |
| H  | -1.671875 | -1.779514 | 1.667339  |
| H  | -1.267109 | 2.950475  | 1.097274  |
| H  | 0.254246  | 2.509404  | 1.457906  |
| H  | 0.819229  | 0.046015  | 1.791964  |
| H  | -0.195550 | -0.253597 | 3.148331  |
| H  | -2.053068 | 0.661624  | 1.116337  |
| H  | -1.587853 | 1.397955  | 2.634831  |

**Cd(L333)<sup>2+</sup> (IX)**

|    |           |           |           |
|----|-----------|-----------|-----------|
| N  | -0.073296 | -0.084630 | 2.260607  |
| C  | -0.073296 | 1.441267  | 2.260607  |
| C  | -1.464532 | -0.705646 | 2.260607  |
| Cd | 1.151700  | -0.908905 | 0.550849  |
| C  | 1.025629  | 2.107635  | 1.412598  |
| C  | -1.570009 | -2.095093 | 1.602940  |
| N  | 1.521254  | 0.862039  | -0.779531 |

|   |           |           |           |
|---|-----------|-----------|-----------|
| N | -0.274640 | -2.180797 | -0.625801 |
| C | 0.853953  | 2.055111  | -0.122096 |
| C | -1.627485 | -2.128036 | 0.060542  |
| C | -0.310568 | -1.713109 | -2.067987 |
| C | 1.020783  | 0.578495  | -2.181933 |
| C | -0.317150 | -0.183727 | -2.271229 |
| H | 0.367211  | -0.372428 | 3.136960  |
| H | 0.012277  | 1.784437  | 3.295125  |
| H | -1.051290 | 1.767684  | 1.899668  |
| H | -2.128207 | -0.011861 | 1.739228  |
| H | -1.814277 | -0.762417 | 3.295423  |
| H | 2.024759  | 1.752835  | 1.706292  |
| H | 1.018702  | 3.164804  | 1.700582  |
| H | -2.513835 | -2.522707 | 1.959450  |
| H | -0.799670 | -2.780551 | 1.985552  |
| H | 2.513835  | 1.094217  | -0.865234 |
| H | 0.003983  | -3.164804 | -0.645897 |
| H | 1.268471  | 2.960878  | -0.575681 |
| H | -0.206781 | 2.028703  | -0.385687 |
| H | -2.150287 | -1.243179 | -0.310856 |
| H | -2.203101 | -2.997476 | -0.271752 |
| H | -1.203417 | -2.138826 | -2.538592 |
| H | 0.556015  | -2.156184 | -2.568673 |
| H | 1.808540  | 0.015146  | -2.691783 |
| H | 0.921016  | 1.535424  | -2.705773 |
| H | -1.081995 | 0.292291  | -1.645356 |
| H | -0.673042 | -0.026595 | -3.295423 |

**Cd(L333H)<sup>3+</sup>( X)**

|    |           |           |           |
|----|-----------|-----------|-----------|
| N  | 1.055303  | -0.411655 | 2.263252  |
| C  | 1.055303  | 1.128196  | 2.263252  |
| C  | -0.306229 | -1.095929 | 2.263252  |
| Cd | 2.501251  | -0.949770 | 0.615172  |
| C  | 0.783695  | 1.884316  | 0.942315  |
| C  | -1.116388 | -0.857024 | 0.965127  |
| N  | 1.915304  | 0.527354  | -1.004008 |
| C  | 1.787057  | 1.850889  | -0.229452 |
| C  | -1.668130 | -2.105864 | 0.251799  |
| C  | 0.697537  | 0.169135  | -1.838166 |
| N  | -2.037000 | -1.751666 | -1.194159 |
| C  | 0.460298  | -1.357510 | -1.941980 |
| C  | -0.951184 | -1.865215 | -2.287489 |
| H  | 1.467805  | -0.669798 | 3.167481  |
| H  | 2.033128  | 1.418247  | 2.663944  |
| H  | 0.308557  | 1.446180  | 2.999632  |
| H  | -0.853972 | -0.719031 | 3.133139  |
| H  | -0.118467 | -2.158235 | 2.444456  |
| H  | 0.782100  | 2.938577  | 1.250559  |
| H  | -0.237558 | 1.721544  | 0.592443  |
| H  | -0.477931 | -0.329721 | 0.263848  |
| H  | -1.948639 | -0.177814 | 1.178766  |
| H  | 2.696454  | 0.660760  | -1.654865 |

|   |           |           |           |
|---|-----------|-----------|-----------|
| H | 2.797542  | 2.099851  | 0.114021  |
| H | 1.502854  | 2.624999  | -0.950293 |
| H | -2.580843 | -2.474084 | 0.726400  |
| H | -0.962629 | -2.938577 | 0.200534  |
| H | 0.840819  | 0.589666  | -2.838801 |
| H | -0.154686 | 0.693041  | -1.405229 |
| H | -2.465707 | -0.816801 | -1.213042 |
| H | -2.797542 | -2.380276 | -1.494659 |
| H | 0.780632  | -1.864068 | -1.013559 |
| H | 1.105238  | -1.772433 | -2.724845 |
| H | -1.361656 | -1.362508 | -3.167481 |
| H | -0.888128 | -2.931334 | -2.515148 |

**B3LYP/LanL2DZ**  
**Ni(L222)<sup>2+</sup>(I)**

|    |           |           |           |
|----|-----------|-----------|-----------|
| N  | 0.646608  | -0.680530 | -1.907049 |
| C  | 0.646608  | 0.843969  | -1.907049 |
| C  | -0.695625 | -1.397207 | -1.907049 |
| Ni | 1.425808  | -1.178119 | -0.143339 |
| C  | 0.446288  | 1.436883  | -0.491483 |
| N  | 1.269423  | 0.686381  | 0.549870  |
| N  | -0.397560 | -1.538443 | 0.633480  |
| C  | -1.385173 | -1.338229 | -0.525627 |
| C  | 0.585523  | 0.479444  | 1.891497  |
| C  | -0.582094 | -0.548836 | 1.790624  |
| H  | 1.174519  | -0.997634 | -2.729376 |
| H  | -0.133286 | 1.222345  | -2.578874 |
| H  | 1.614103  | 1.156194  | -2.316019 |
| H  | -0.496910 | -2.434640 | -2.200682 |
| H  | -1.359709 | -0.962579 | -2.664267 |
| H  | -0.601429 | 1.398586  | -0.187168 |
| H  | 0.737114  | 2.492893  | -0.502086 |
| H  | 2.161250  | 1.172973  | 0.702951  |
| H  | -0.505709 | -2.492893 | 0.996292  |
| H  | -2.161250 | -2.109297 | -0.480071 |
| H  | -1.881727 | -0.376879 | -0.382302 |
| H  | 0.206790  | 1.432636  | 2.278894  |
| H  | 1.355309  | 0.126224  | 2.587451  |
| H  | -0.636408 | -1.108099 | 2.729376  |
| H  | -1.544035 | -0.045090 | 1.664897  |

**Ni(L222H)<sup>2+</sup>(II)**

|    |           |           |           |
|----|-----------|-----------|-----------|
| N  | 1.067440  | -0.641946 | -1.731730 |
| C  | 1.067440  | 0.893988  | -1.731730 |
| C  | -0.302749 | -1.346295 | -1.731730 |
| Ni | 2.365865  | -0.962445 | -0.245399 |
| C  | 0.956128  | 1.485529  | -0.296190 |
| N  | 1.521888  | 0.531999  | 0.779011  |
| C  | -1.401535 | -0.804872 | -0.799206 |
| N  | -1.430969 | -1.344839 | 0.653965  |

|   |           |           |           |
|---|-----------|-----------|-----------|
| C | 0.518978  | 0.013065  | 1.819881  |
| C | -0.154602 | -1.344896 | 1.516876  |
| H | 1.517429  | -0.950823 | -2.610363 |
| H | 0.257677  | 1.272018  | -2.368299 |
| H | 2.005405  | 1.206409  | -2.208620 |
| H | -0.133203 | -2.423673 | -1.606159 |
| H | -0.697059 | -1.222517 | -2.751299 |
| H | -0.072591 | 1.730404  | -0.024060 |
| H | 1.519395  | 2.423673  | -0.256228 |
| H | 2.242401  | 1.049340  | 1.307520  |
| H | -2.365865 | -1.106828 | -1.226437 |
| H | -1.418177 | 0.284149  | -0.744321 |
| H | -2.168522 | -0.817171 | 1.155919  |
| H | -1.772604 | -2.322883 | 0.627480  |
| H | -0.215837 | 0.802337  | 2.025743  |
| H | 1.081027  | -0.129484 | 2.751299  |
| H | 0.528397  | -2.085182 | 1.068104  |
| H | -0.456454 | -1.782231 | 2.477804  |

**Ni(L223)<sup>2+</sup>(III)**

|    |           |           |           |
|----|-----------|-----------|-----------|
| N  | 0.412984  | -0.168648 | 1.826305  |
| C  | 0.412984  | 1.369815  | 1.826305  |
| C  | -0.983183 | -0.792502 | 1.826305  |
| Ni | 1.303027  | -0.925949 | 0.203587  |
| C  | 0.911996  | 2.007653  | 0.508460  |
| N  | 0.817477  | 0.250361  | -1.325136 |
| C  | -0.973355 | -2.189983 | 1.177149  |
| N  | -0.257705 | -2.135448 | -0.165471 |
| C  | 0.205014  | 1.544115  | -0.785680 |
| C  | -1.039953 | -1.451999 | -1.283701 |
| C  | -0.104558 | -0.611516 | -2.177926 |
| H  | 0.905573  | -0.483931 | 2.673207  |
| H  | 1.052334  | 1.706373  | 2.648662  |
| H  | -0.606022 | 1.703797  | 2.049518  |
| H  | -1.644978 | -0.113408 | 1.282582  |
| H  | -1.362824 | -0.861392 | 2.851831  |
| H  | 2.002750  | 1.883350  | 0.404319  |
| H  | 0.762487  | 3.089888  | 0.613168  |
| H  | 1.639618  | 0.506066  | -1.888406 |
| H  | -2.002750 | -2.547368 | 1.052537  |
| H  | -0.444427 | -2.918457 | 1.803217  |
| H  | -0.010541 | -3.089888 | -0.454003 |
| H  | 0.293869  | 2.311865  | -1.562684 |
| H  | -0.863375 | 1.373173  | -0.619881 |
| H  | -1.810431 | -0.825509 | -0.826598 |
| H  | -1.553763 | -2.203079 | -1.893007 |
| H  | 0.527783  | -1.257106 | -2.798465 |
| H  | -0.698903 | 0.016852  | -2.851831 |

**Ni(L223H)<sup>3+</sup>(IV)**

|      |           |           |           |
|------|-----------|-----------|-----------|
| N 0  | 0.683046  | -0.370986 | 1.812917  |
| C 0  | 0.683046  | 1.179588  | 1.812917  |
| C 0  | -0.676526 | -1.086125 | 1.812917  |
| Ni 0 | 1.993044  | -0.700139 | 0.357209  |
| C 0  | 1.750817  | 1.740951  | 0.834354  |
| N    | 1.329976  | 0.289438  | -1.234258 |
| C    | -1.011651 | -1.937806 | 0.566310  |
| N    | -1.830754 | -1.238328 | -0.536955 |
| C    | 1.395790  | 1.733538  | -0.676993 |
| C    | 0.039231  | -0.090163 | -1.972000 |
| C    | -1.285547 | 0.048577  | -1.192328 |
| H    | 1.157359  | -0.665232 | 2.682892  |
| H    | 0.898159  | 1.518182  | 2.832133  |
| H    | -0.316428 | 1.538873  | 1.554116  |
| H    | -1.458862 | -0.349493 | 2.032513  |
| H    | -0.667601 | -1.777661 | 2.662951  |
| H    | 2.763293  | 1.289413  | 1.026273  |
| H    | 1.948055  | 2.787231  | 1.115954  |
| H    | 2.073155  | 0.197050  | -1.948743 |
| H    | -1.628051 | -2.787231 | 0.885547  |
| H    | -0.124066 | -2.372482 | 0.088527  |
| H    | -2.013179 | -1.937842 | -1.278931 |
| H    | -2.763293 | -1.006812 | -0.149383 |
| H    | 2.163713  | 2.277316  | -1.237886 |
| H    | 0.442629  | 2.238244  | -0.855825 |
| H    | 0.173444  | -1.095091 | -2.393049 |
| H    | -0.026163 | 0.590526  | -2.832133 |
| H    | -1.250086 | 0.814574  | -0.414826 |
| H    | -2.064651 | 0.354421  | -1.900326 |

### Ni(L223H)<sup>3+</sup>(V)

|    |           |           |           |
|----|-----------|-----------|-----------|
| N  | 1.929708  | -0.730578 | 1.227776  |
| C  | 1.929708  | 0.820157  | 1.227776  |
| C  | 0.576027  | -1.495468 | 1.227776  |
| C  | 1.288678  | 1.488303  | -0.015411 |
| C  | 0.071375  | -2.089338 | -0.109857 |
| N  | -0.781857 | -1.231924 | -1.069779 |
| C  | -0.228482 | 1.868057  | 0.111040  |
| Ni | 0.061109  | 0.247992  | -2.150373 |
| N  | -1.013019 | 1.575978  | -1.164679 |
| C  | -2.045654 | -0.607475 | -0.431136 |
| C  | -2.324755 | 0.811975  | -0.978631 |
| H  | 2.539537  | -1.078173 | 0.469745  |
| H  | 2.414494  | -0.999548 | 2.103951  |
| H  | 2.984535  | 1.105582  | 1.305038  |
| H  | 1.432166  | 1.138525  | 2.150373  |
| H  | -0.148881 | -0.857942 | 1.738235  |
| H  | 0.739837  | -2.359617 | 1.882224  |
| H  | 1.514806  | 0.826509  | -0.903747 |
| H  | 1.870596  | 2.389694  | -0.244782 |
| H  | -0.568736 | -2.935976 | 0.177887  |

|   |           |           |           |
|---|-----------|-----------|-----------|
| H | 0.893079  | -2.521114 | -0.696915 |
| H | -1.103401 | -1.910768 | -1.780990 |
| H | -0.316299 | 2.935976  | 0.337395  |
| H | -0.706133 | 1.329929  | 0.932476  |
| H | -1.197362 | 2.449453  | -1.680830 |
| H | -1.912711 | -0.594093 | 0.651356  |
| H | -2.907833 | -1.251506 | -0.637229 |
| H | -2.830088 | 0.787527  | -1.952664 |
| H | -2.984535 | 1.355494  | -0.290073 |

**Ni(L233)<sup>2+</sup>(VI)**

|    |           |           |           |
|----|-----------|-----------|-----------|
| N  | 0.236682  | -0.174032 | 2.284642  |
| C  | 0.236682  | 1.352557  | 2.284642  |
| C  | -1.160556 | -0.799643 | 2.284642  |
| Ni | 1.264785  | -0.624481 | 0.628667  |
| C  | -1.235429 | -2.155241 | 1.550874  |
| N  | 1.047408  | 1.224371  | -0.085994 |
| C  | 0.039123  | 1.877391  | 0.848870  |
| N  | 0.240906  | -1.858376 | -0.533733 |
| C  | -1.175349 | -2.058748 | 0.011812  |
| C  | 0.279215  | -1.387063 | -1.999025 |
| C  | 0.654876  | 1.168362  | -1.563545 |
| C  | 1.146937  | -0.130611 | -2.242723 |
| H  | 0.726413  | -0.502840 | 3.127103  |
| H  | 1.192994  | 1.691140  | 2.701689  |
| H  | -0.559154 | 1.733006  | 2.935462  |
| H  | -1.845297 | -0.085425 | 1.815021  |
| H  | -1.476991 | -0.918238 | 3.327386  |
| H  | -2.204762 | -2.601626 | 1.807760  |
| H  | -0.484744 | -2.860994 | 1.939033  |
| H  | 1.941639  | 1.729874  | -0.014208 |
| H  | 0.140974  | 2.968180  | 0.829092  |
| H  | -0.960836 | 1.633177  | 0.478106  |
| H  | 0.711569  | -2.773990 | -0.488057 |
| H  | -1.779744 | -1.215462 | -0.338912 |
| H  | -1.586765 | -2.968180 | -0.442716 |
| H  | -0.751886 | -1.195235 | -2.312537 |
| H  | 0.659176  | -2.211409 | -2.611668 |
| H  | 1.078238  | 2.041869  | -2.071230 |
| H  | -0.435209 | 1.249412  | -1.627621 |
| H  | 1.148203  | 0.039682  | -3.327386 |
| H  | 2.204762  | -0.323100 | -1.990799 |

**Ni(L233H)<sup>3+</sup>(VII)**

|   |          |           |          |
|---|----------|-----------|----------|
| N | 0.379843 | -0.148830 | 1.717288 |
| C | 0.379843 | 1.391060  | 1.717288 |

|    |           |           |           |
|----|-----------|-----------|-----------|
| C  | -1.020277 | -0.811718 | 1.717288  |
| Ni | 1.450034  | -1.315592 | 0.491882  |
| C  | -0.944740 | -2.285792 | 1.244803  |
| C  | -0.218539 | 2.168771  | 0.518951  |
| N  | 0.255389  | -1.848188 | -0.974639 |
| N  | 0.773747  | 2.630717  | -0.586999 |
| C  | -0.941920 | -2.532150 | -0.286797 |
| C  | -0.073310 | -0.573779 | -1.736676 |
| C  | 0.809074  | 1.876160  | -1.942408 |
| C  | 1.160308  | 0.372392  | -1.836141 |
| H  | 0.797166  | -0.382866 | 2.636794  |
| H  | 1.404832  | 1.718353  | 1.936459  |
| H  | -0.220089 | 1.680469  | 2.591754  |
| H  | -1.689149 | -0.223916 | 1.083412  |
| H  | -1.411078 | -0.764271 | 2.740742  |
| H  | -1.818048 | -2.817419 | 1.648736  |
| H  | -0.095381 | -2.814762 | 1.736186  |
| H  | -0.629312 | 3.095352  | 0.934551  |
| H  | -1.047208 | 1.660115  | 0.023720  |
| H  | 0.713436  | -2.521858 | -1.608945 |
| H  | 0.522005  | 3.607209  | -0.823522 |
| H  | 1.731375  | 2.685013  | -0.204045 |
| H  | -1.864975 | -2.167840 | -0.749773 |
| H  | -0.873485 | -3.607209 | -0.481154 |
| H  | -0.910247 | -0.100004 | -1.219476 |
| H  | -0.426491 | -0.839016 | -2.740742 |
| H  | 1.558110  | 2.402773  | -2.543323 |
| H  | -0.165782 | 2.030418  | -2.417236 |
| H  | 1.766576  | 0.105375  | -2.710027 |
| H  | 1.864975  | 0.240974  | -0.973626 |

**Ni(L233H)<sup>3+</sup>(VIII)**

|    |           |           |           |
|----|-----------|-----------|-----------|
| N  | 1.378531  | -0.502261 | 2.354150  |
| C  | 1.378531  | 1.029643  | 2.354150  |
| C  | 0.015451  | -1.207263 | 2.354150  |
| Ni | 2.317903  | -0.912229 | 0.645247  |
| C  | -0.480025 | -1.588994 | 0.919194  |
| N  | 1.980018  | 0.915951  | -0.103235 |
| C  | 1.083103  | 1.580677  | 0.946597  |
| C  | -1.731283 | -0.799560 | 0.445841  |
| C  | 1.494665  | 1.045019  | -1.563887 |
| N  | -1.896665 | -0.732701 | -1.085034 |
| C  | 0.422411  | 0.054015  | -2.098418 |
| C  | -1.088550 | 0.362816  | -1.840359 |
| H  | 1.897658  | -0.820012 | 3.187004  |
| H  | 2.363458  | 1.355538  | 2.711621  |
| H  | 0.637219  | 1.402326  | 3.071326  |
| H  | -0.705697 | -0.566645 | 2.875967  |
| H  | 0.130555  | -2.114078 | 2.955210  |
| H  | -0.693565 | -2.664333 | 0.888764  |
| H  | 0.339032  | -1.444900 | 0.174071  |
| H  | 2.894964  | 1.398264  | -0.079269 |

|   |           |           |           |
|---|-----------|-----------|-----------|
| H | 1.250880  | 2.664333  | 0.933243  |
| H | 0.046380  | 1.405662  | 0.657596  |
| H | -1.740740 | 0.235797  | 0.796218  |
| H | -2.629795 | -1.285884 | 0.843598  |
| H | 2.392154  | 0.925239  | -2.181009 |
| H | 1.157288  | 2.082648  | -1.695300 |
| H | -1.723622 | -1.656669 | -1.514580 |
| H | -2.894964 | -0.527534 | -1.268013 |
| H | 0.676332  | -0.989116 | -1.855916 |
| H | 0.557775  | 0.097195  | -3.187004 |
| H | -1.253732 | 1.293749  | -1.289711 |
| H | -1.601223 | 0.467266  | -2.802010 |

**Ni(L333)<sup>2+</sup>( IX)**

|    |           |           |           |
|----|-----------|-----------|-----------|
| N  | -0.225854 | -0.117300 | 2.224732  |
| C  | -0.225854 | 1.416622  | 2.224732  |
| C  | -1.642835 | -0.705551 | 2.224732  |
| Ni | 0.944906  | -0.897526 | 0.805630  |
| C  | 1.049367  | 2.049025  | 1.633579  |
| C  | -1.740385 | -2.121890 | 1.624905  |
| N  | 1.740578  | 0.540338  | -0.313643 |
| N  | -0.078117 | -2.178855 | -0.318548 |
| C  | 1.186754  | 1.901251  | 0.103491  |
| C  | -1.548233 | -2.184046 | 0.094919  |
| C  | 0.126153  | -1.911698 | -1.812413 |
| C  | 1.573512  | 0.254419  | -1.808512 |
| C  | 0.230676  | -0.414273 | -2.167752 |
| H  | 0.223257  | -0.417710 | 3.103957  |
| H  | -0.375433 | 1.759452  | 3.255473  |
| H  | -1.095139 | 1.737783  | 1.642460  |
| H  | -2.274997 | -0.021594 | 1.649926  |
| H  | -2.013049 | -0.706487 | 3.256906  |
| H  | 1.955691  | 1.694877  | 2.150819  |
| H  | 0.999401  | 3.122388  | 1.857198  |
| H  | -2.752253 | -2.486159 | 1.844151  |
| H  | -1.068697 | -2.827542 | 2.139939  |
| H  | 2.752253  | 0.560449  | -0.115943 |
| H  | 0.288002  | -3.122388 | -0.121928 |
| H  | 1.858964  | 2.671416  | -0.294203 |
| H  | 0.215369  | 2.028240  | -0.385948 |
| H  | -2.031653 | -1.329461 | -0.390204 |
| H  | -2.006245 | -3.094777 | -0.309966 |
| H  | -0.713304 | -2.366713 | -2.351956 |
| H  | 1.036583  | -2.439262 | -2.120599 |
| H  | 2.409899  | -0.383397 | -2.118017 |
| H  | 1.672876  | 1.205955  | -2.344764 |
| H  | -0.615251 | 0.150505  | -1.750609 |
| H  | 0.118685  | -0.337540 | -3.256906 |

**Ni(L333H)<sup>3+</sup>( X)**



|    |           |           |           |
|----|-----------|-----------|-----------|
| N  | 1.067440  | -0.641946 | -1.731730 |
| C  | 1.067440  | 0.893988  | -1.731730 |
| C  | -0.302749 | -1.346295 | -1.731730 |
| Ni | 2.365865  | -0.962445 | -0.245399 |
| C  | 0.956128  | 1.485529  | -0.296190 |
| N  | 1.521888  | 0.531999  | 0.779011  |
| C  | -1.401535 | -0.804872 | -0.799206 |
| N  | -1.430969 | -1.344839 | 0.653965  |
| C  | 0.518978  | 0.013065  | 1.819881  |
| C  | -0.154602 | -1.344896 | 1.516876  |
| H  | 1.517429  | -0.950823 | -2.610363 |
| H  | 0.257677  | 1.272018  | -2.368299 |
| H  | 2.005405  | 1.206409  | -2.208620 |
| H  | -0.133203 | -2.423673 | -1.606159 |
| H  | -0.697059 | -1.222517 | -2.751299 |
| H  | -0.072591 | 1.730404  | -0.024060 |
| H  | 1.519395  | 2.423673  | -0.256228 |
| H  | 2.242401  | 1.049340  | 1.307520  |
| H  | -2.365865 | -1.106828 | -1.226437 |
| H  | -1.418177 | 0.284149  | -0.744321 |
| H  | -2.168522 | -0.817171 | 1.155919  |
| H  | -1.772604 | -2.322883 | 0.627480  |
| H  | -0.215837 | 0.802337  | 2.025743  |
| H  | 1.081027  | -0.129484 | 2.751299  |
| H  | 0.528397  | -2.085182 | 1.068104  |
| H  | -0.456454 | -1.782231 | 2.477804  |

**B3LYP/DZVP2**

**Ni(L222)<sup>2+</sup>(I)**

|    |           |           |           |
|----|-----------|-----------|-----------|
| N  | -0.641587 | -1.886575 | -0.678874 |
| C  | -0.647190 | -1.889915 | 0.830646  |
| C  | 0.685151  | -1.888046 | -1.392530 |
| Ni | -1.427030 | -0.141829 | -1.180874 |
| C  | -0.442790 | -0.481284 | 1.420367  |
| N  | -1.259043 | 0.546523  | 0.672406  |
| N  | 0.389356  | 0.632419  | -1.529127 |
| C  | 1.372791  | -0.512820 | -1.340303 |
| C  | -0.590021 | 1.878037  | 0.468501  |
| C  | 0.578840  | 1.777368  | -0.548340 |
| H  | -1.154726 | -2.714442 | -0.988922 |
| H  | 0.118940  | -2.569948 | 1.215164  |
| H  | -1.621156 | -2.284310 | 1.131485  |
| H  | 0.474432  | -2.174447 | -2.426697 |
| H  | 1.349487  | -2.647599 | -0.968715 |
| H  | 0.602927  | -0.179800 | 1.375958  |
| H  | -0.727916 | -0.487237 | 2.475095  |
| H  | -2.141230 | 0.701548  | 1.165642  |
| H  | 0.505971  | 0.999488  | -2.475095 |
| H  | 2.141230  | -0.467612 | -2.115101 |
| H  | 1.876182  | -0.369433 | -0.385329 |
| H  | -0.227155 | 2.279611  | 1.419470  |
| H  | -1.362033 | 2.558812  | 0.099019  |

|   |          |          |           |
|---|----------|----------|-----------|
| H | 0.640687 | 2.714442 | -1.104026 |
| H | 1.535623 | 1.643791 | -0.042573 |

**Ni(L222H)<sup>3+</sup>( II)**

|    |           |           |           |
|----|-----------|-----------|-----------|
| N  | -1.017700 | -1.721887 | -0.665586 |
| C  | -1.039120 | -1.776511 | 0.854731  |
| C  | 0.355385  | -1.678903 | -1.338464 |
| Ni | -2.400647 | -0.265526 | -0.942608 |
| C  | -0.964456 | -0.364932 | 1.485184  |
| N  | -1.526367 | 0.715762  | 0.556549  |
| C  | 1.434926  | -0.765709 | -0.745139 |
| N  | 1.468385  | 0.696191  | -1.203467 |
| C  | -0.545670 | 1.788490  | 0.102674  |
| C  | 0.213143  | 1.564200  | -1.216630 |
| H  | -1.431612 | -2.600189 | -1.004794 |
| H  | -0.228027 | -2.414096 | 1.221855  |
| H  | -1.975147 | -2.270299 | 1.131805  |
| H  | 0.205345  | -1.515502 | -2.410099 |
| H  | 0.754395  | -2.696316 | -1.240637 |
| H  | 0.052266  | -0.078750 | 1.753427  |
| H  | -1.545491 | -0.356973 | 2.410099  |
| H  | -2.248357 | 1.219915  | 1.086091  |
| H  | 2.400647  | -1.174030 | -1.058840 |
| H  | 1.444489  | -0.766880 | 0.343492  |
| H  | 2.191373  | 1.168380  | -0.639835 |
| H  | 1.845655  | 0.723235  | -2.162593 |
| H  | 0.132586  | 2.005304  | 0.935591  |
| H  | -1.135904 | 2.696316  | -0.055571 |
| H  | -0.423517 | 1.183299  | -2.022749 |
| H  | 0.556409  | 2.547875  | -1.553875 |

**Ni(L223)<sup>2+</sup>( III)**

|    |           |           |           |
|----|-----------|-----------|-----------|
| N  | -0.440360 | -1.418699 | 0.498071  |
| C  | -1.811611 | -1.038781 | -0.046529 |
| C  | 0.559172  | -1.816843 | -0.567037 |
| Ni | 0.434735  | 0.057854  | 1.500924  |
| C  | -2.159929 | 0.454768  | 0.098459  |
| N  | -0.012928 | 1.715741  | 0.521452  |
| C  | 1.998055  | -1.554762 | -0.103847 |
| N  | 2.114374  | -0.157203 | 0.444573  |
| C  | -1.133914 | 1.455006  | -0.463272 |
| C  | 2.088573  | 0.942970  | -0.592023 |
| C  | 1.299947  | 2.156028  | -0.075187 |
| H  | -0.570147 | -2.224544 | 1.115484  |
| H  | -2.559123 | -1.630099 | 0.485839  |
| H  | -1.848191 | -1.339054 | -1.096276 |
| H  | 0.328479  | -1.239273 | -1.462924 |
| H  | 0.436507  | -2.872363 | -0.823471 |
| H  | -2.378541 | 0.699788  | 1.147665  |
| H  | -3.107922 | 0.603984  | -0.428043 |
| H  | -0.332523 | 2.453864  | 1.154072  |
| H  | 2.692031  | -1.707765 | -0.936151 |
| H  | 2.286075  | -2.241508 | 0.697470  |
| H  | 2.981292  | -0.088897 | 0.981792  |

|   |           |          |           |
|---|-----------|----------|-----------|
| H | -1.618948 | 2.409721 | -0.683363 |
| H | -0.692382 | 1.095371 | -1.395017 |
| H | 1.637197  | 0.543629 | -1.500924 |
| H | 3.107922  | 1.244582 | -0.844004 |
| H | 1.857055  | 2.669389 | 0.713487  |
| H | 1.134820  | 2.872363 | -0.885376 |

**Ni(L223H)<sup>3+</sup>(IV)**

|    |           |           |           |
|----|-----------|-----------|-----------|
| N  | 0.667146  | -0.334898 | 1.811132  |
| C  | 0.667146  | 1.196503  | 1.811132  |
| C  | -0.673339 | -1.055066 | 1.811132  |
| Ni | 2.006103  | -0.627893 | 0.392466  |
| C  | 1.732778  | 1.734545  | 0.826367  |
| N  | 1.324577  | 0.301615  | -1.212838 |
| C  | -0.992043 | -1.926669 | 0.582198  |
| N  | -1.782914 | -1.263382 | -0.541737 |
| C  | 1.372592  | 1.733839  | -0.676075 |
| C  | 0.069685  | -0.101070 | -1.965489 |
| C  | -1.270242 | 0.005725  | -1.219512 |
| H  | 1.127542  | -0.619312 | 2.683927  |
| H  | 0.890226  | 1.538608  | 2.824648  |
| H  | -0.328040 | 1.560998  | 1.553029  |
| H  | -1.464010 | -0.326866 | 2.014663  |
| H  | -0.661314 | -1.736154 | 2.665661  |
| H  | 2.726523  | 1.230290  | 1.000488  |
| H  | 1.996955  | 2.760787  | 1.115586  |
| H  | 2.071458  | 0.219168  | -1.915407 |
| H  | -1.619481 | -2.760787 | 0.910607  |
| H  | -0.103032 | -2.380551 | 0.132712  |
| H  | -1.946150 | -1.981164 | -1.263359 |
| H  | -2.726523 | -1.047771 | -0.186994 |
| H  | 2.134386  | 2.281245  | -1.236484 |
| H  | 0.417372  | 2.231314  | -0.849570 |
| H  | 0.234131  | -1.100326 | -2.381245 |
| H  | 0.001753  | 0.576176  | -2.824648 |
| H  | -1.285918 | 0.797918  | -0.470786 |
| H  | -2.041673 | 0.256265  | -1.953150 |

**Ni(L223H)<sup>3+</sup>(V)**

|    |           |           |           |
|----|-----------|-----------|-----------|
| N  | 1.912845  | -0.768077 | 1.194539  |
| C  | 1.912845  | 0.764625  | 1.194539  |
| C  | 0.592458  | -1.558674 | 1.194539  |
| C  | 1.284890  | 1.450459  | -0.039682 |
| C  | 0.065440  | -2.107851 | -0.144056 |
| N  | -0.742987 | -1.214390 | -1.077673 |
| C  | -0.220267 | 1.864493  | 0.075530  |
| Ni | 0.130567  | 0.261668  | -2.114102 |
| N  | -0.991020 | 1.565576  | -1.187361 |
| C  | -1.995136 | -0.601100 | -0.446911 |
| C  | -2.282397 | 0.798569  | -1.017967 |
| H  | 2.537398  | -1.117971 | 0.455996  |
| H  | 2.397736  | -1.030420 | 2.066017  |
| H  | 2.966271  | 1.043825  | 1.276025  |
| H  | 1.413792  | 1.080981  | 2.114102  |

|   |           |           |           |
|---|-----------|-----------|-----------|
| H | -0.130818 | -0.969382 | 1.758749  |
| H | 0.801583  | -2.446261 | 1.798265  |
| H | 1.521227  | 0.795045  | -0.930221 |
| H | 1.886474  | 2.336410  | -0.265662 |
| H | -0.597497 | -2.935589 | 0.135634  |
| H | 0.871384  | -2.556718 | -0.734379 |
| H | -1.068947 | -1.866429 | -1.803250 |
| H | -0.283415 | 2.935589  | 0.281384  |
| H | -0.707945 | 1.351126  | 0.903181  |
| H | -1.178986 | 2.431338  | -1.705565 |
| H | -1.849731 | -0.561102 | 0.630980  |
| H | -2.852000 | -1.254865 | -0.630065 |
| H | -2.756405 | 0.749130  | -2.003686 |
| H | -2.966271 | 1.343347  | -0.357655 |

**Ni(L233)<sup>2+</sup>( VI)**

|    |           |           |           |
|----|-----------|-----------|-----------|
| N  | 0.198898  | -0.152460 | 2.266496  |
| C  | 0.198898  | 1.357888  | 2.266496  |
| C  | -1.178610 | -0.784152 | 2.266496  |
| Ni | 1.250832  | -0.608374 | 0.645393  |
| C  | -1.237853 | -2.136357 | 1.538436  |
| N  | 1.064290  | 1.232008  | -0.062983 |
| C  | 0.041578  | 1.882357  | 0.832711  |
| N  | 0.207531  | -1.786281 | -0.538090 |
| C  | -1.182498 | -2.045292 | 0.005750  |
| C  | 0.223496  | -1.292351 | -1.979814 |
| C  | 0.741954  | 1.225383  | -1.544101 |
| C  | 1.154494  | -0.091622 | -2.225543 |
| H  | 0.676118  | -0.466423 | 3.114821  |
| H  | 1.147902  | 1.688363  | 2.699020  |
| H  | -0.604181 | 1.742825  | 2.901367  |
| H  | -1.868478 | -0.078657 | 1.797592  |
| H  | -1.493662 | -0.903738 | 3.306481  |
| H  | -2.198053 | -2.594081 | 1.796909  |
| H  | -0.477747 | -2.828214 | 1.924937  |
| H  | 1.952381  | 1.727713  | 0.056779  |
| H  | 0.143188  | 2.970889  | 0.815139  |
| H  | -0.945335 | 1.636737  | 0.435064  |
| H  | 0.691955  | -2.689222 | -0.528169 |
| H  | -1.823097 | -1.232536 | -0.344487 |
| H  | -1.555790 | -2.970889 | -0.442182 |
| H  | -0.801209 | -1.030536 | -2.250580 |
| H  | 0.528211  | -2.122729 | -2.620862 |
| H  | 1.256829  | 2.065874  | -2.015449 |
| H  | -0.331175 | 1.395480  | -1.655099 |
| H  | 1.157730  | 0.083963  | -3.306481 |
| H  | 2.198053  | -0.343149 | -1.981348 |

**Ni(L233H)<sup>3+</sup>( VII)**

|   |           |           |          |
|---|-----------|-----------|----------|
| N | 0.414289  | -0.057417 | 1.655243 |
| C | 0.595231  | 1.453451  | 1.621916 |
| C | -1.041975 | -0.533838 | 1.685082 |
| C | -1.163281 | -2.026588 | 1.325927 |

|    |           |           |           |
|----|-----------|-----------|-----------|
| N  | 1.169472  | 2.499489  | -0.725051 |
| C  | 0.137785  | 2.267022  | 0.394861  |
| N  | 0.123916  | -1.888041 | -0.871409 |
| C  | -1.137284 | -2.386563 | -0.174066 |
| C  | -0.041006 | -0.643295 | -1.698479 |
| C  | 1.145323  | 1.661217  | -2.007792 |
| C  | 1.296019  | 0.138736  | -1.809188 |
| Ni | 1.405732  | -1.316734 | 0.479786  |
| H  | 0.789467  | -0.308556 | 2.580612  |
| H  | 1.641528  | 1.665256  | 1.865744  |
| H  | 0.008738  | 1.841710  | 2.462808  |
| H  | -1.626312 | 0.089010  | 1.006265  |
| H  | -1.421226 | -0.360715 | 2.696810  |
| H  | -2.119192 | -2.390513 | 1.720199  |
| H  | -0.415485 | -2.620147 | 1.883386  |
| H  | 1.039269  | 3.472392  | -1.039079 |
| H  | 2.119192  | 2.494602  | -0.330842 |
| H  | -0.083973 | 3.267351  | 0.774834  |
| H  | -0.778231 | 1.906479  | -0.072912 |
| H  | 0.499128  | -2.642282 | -1.459082 |
| H  | -2.002403 | -1.972734 | -0.698433 |
| H  | -1.167839 | -3.472392 | -0.283825 |
| H  | -0.818296 | -0.045254 | -1.224369 |
| H  | -0.401944 | -0.910137 | -2.696810 |
| H  | 1.968859  | 2.047729  | -2.612791 |
| H  | 0.212175  | 1.900441  | -2.524076 |
| H  | 1.892983  | -0.253939 | -2.638013 |
| H  | 1.973832  | -0.018767 | -0.924215 |

**Ni(L233H)<sup>3+</sup> (VIII)**

|    |           |           |           |
|----|-----------|-----------|-----------|
| N  | 1.379824  | -0.479919 | 2.356449  |
| C  | 1.379824  | 1.034546  | 2.356449  |
| C  | 0.037344  | -1.184973 | 2.356449  |
| Ni | 2.269356  | -0.891478 | 0.644243  |
| C  | -0.426858 | -1.586418 | 0.922133  |
| N  | 1.933824  | 0.924617  | -0.089166 |
| C  | 1.061274  | 1.583360  | 0.960238  |
| C  | -1.685909 | -0.838244 | 0.426282  |
| C  | 1.456300  | 1.077395  | -1.531460 |
| N  | -1.843335 | -0.798571 | -1.087353 |
| C  | 0.431993  | 0.067114  | -2.103760 |
| C  | -1.091120 | 0.291549  | -1.870650 |
| H  | 1.898551  | -0.791522 | 3.185076  |
| H  | 2.373642  | 1.352706  | 2.686509  |
| H  | 0.658923  | 1.410160  | 3.089492  |
| H  | -0.696985 | -0.546531 | 2.856106  |
| H  | 0.152152  | -2.082273 | 2.966276  |
| H  | -0.601416 | -2.665587 | 0.883728  |
| H  | 0.394483  | -1.419487 | 0.182820  |
| H  | 2.843490  | 1.403538  | -0.062177 |
| H  | 1.222207  | 2.665587  | 0.943858  |
| H  | 0.022021  | 1.403186  | 0.689560  |
| H  | -1.726622 | 0.198885  | 0.761190  |
| H  | -2.571587 | -1.342286 | 0.824023  |

|   |           |           |           |
|---|-----------|-----------|-----------|
| H | 2.358576  | 1.002379  | -2.142813 |
| H | 1.087140  | 2.103535  | -1.638987 |
| H | -1.655584 | -1.722364 | -1.499942 |
| H | -2.843490 | -0.637109 | -1.274470 |
| H | 0.726974  | -0.971119 | -1.903367 |
| H | 0.575989  | 0.157545  | -3.185076 |
| H | -1.319088 | 1.234239  | -1.369099 |
| H | -1.597442 | 0.316290  | -2.837584 |

**Ni(L333)<sup>2+</sup> (IX)**

|    |           |           |           |
|----|-----------|-----------|-----------|
| N  | -0.244347 | -0.106273 | 2.209791  |
| C  | -0.244347 | 1.411060  | 2.209791  |
| C  | -1.644184 | -0.691598 | 2.209791  |
| Ni | 0.960149  | -0.906917 | 0.851843  |
| C  | 1.029593  | 2.039321  | 1.629282  |
| C  | -1.732378 | -2.107873 | 1.625575  |
| N  | 1.742883  | 0.515015  | -0.273195 |
| N  | -0.050188 | -2.175127 | -0.275807 |
| C  | 1.194249  | 1.869561  | 0.110623  |
| C  | -1.511808 | -2.189347 | 0.106666  |
| C  | 0.184156  | -1.946525 | -1.754957 |
| C  | 1.622562  | 0.212896  | -1.753136 |
| C  | 0.301273  | -0.465426 | -2.145006 |
| H  | 0.187345  | -0.393684 | 3.094925  |
| H  | -0.398897 | 1.754718  | 3.236607  |
| H  | -1.108553 | 1.731792  | 1.624698  |
| H  | -2.273511 | -0.017187 | 1.625803  |
| H  | -2.020760 | -0.683246 | 3.236612  |
| H  | 1.926748  | 1.696477  | 2.163126  |
| H  | 0.970781  | 3.112743  | 1.835033  |
| H  | -2.745294 | -2.468284 | 1.830712  |
| H  | -1.069543 | -2.804610 | 2.157203  |
| H  | 2.745294  | 0.545883  | -0.061566 |
| H  | 0.306114  | -3.112743 | -0.064737 |
| H  | 1.876491  | 2.629481  | -0.282198 |
| H  | 0.235484  | 1.995884  | -0.398018 |
| H  | -1.996034 | -1.350555 | -0.399090 |
| H  | -1.951212 | -3.109838 | -0.289401 |
| H  | -0.640128 | -2.412833 | -2.302699 |
| H  | 1.098291  | -2.481550 | -2.026240 |
| H  | 2.468467  | -0.424340 | -2.025118 |
| H  | 1.735659  | 1.153907  | -2.299580 |
| H  | -0.559580 | 0.107119  | -1.779995 |
| H  | 0.234801  | -0.420055 | -3.236612 |

**Ni(L333H)<sup>3+</sup> (X)**

|    |           |           |           |
|----|-----------|-----------|-----------|
| N  | 1.177011  | 0.122006  | 1.981385  |
| C  | 1.177011  | 1.651325  | 1.981385  |
| C  | -0.181183 | -0.547898 | 1.981385  |
| Ni | 2.295095  | -0.190068 | 0.402483  |
| C  | 1.884660  | 2.211975  | 0.721740  |
| C  | -0.182490 | -1.879279 | 1.192090  |
| N  | 1.488593  | 0.623998  | -1.195804 |

|   |           |           |           |
|---|-----------|-----------|-----------|
| C | 1.189552  | 2.017792  | -0.651522 |
| C | -1.591540 | -2.317657 | 0.696429  |
| C | 0.429845  | -0.101653 | -2.018879 |
| N | -1.675738 | -2.494882 | -0.820834 |
| C | -1.005656 | -0.038495 | -1.444781 |
| C | -1.914258 | -1.253041 | -1.698421 |
| H | 1.686735  | -0.196533 | 2.813649  |
| H | 1.709624  | 1.992752  | 2.871590  |
| H | 0.149021  | 2.011376  | 2.047204  |
| H | -0.887067 | 0.166017  | 1.557994  |
| H | -0.481483 | -0.715215 | 3.019927  |
| H | 2.948435  | 1.855155  | 0.677063  |
| H | 2.040957  | 3.286043  | 0.884931  |
| H | 0.242840  | -2.678819 | 1.803965  |
| H | 0.479290  | -1.788415 | 0.313414  |
| H | 2.286322  | 0.728426  | -1.836779 |
| H | 1.562553  | 2.756582  | -1.365452 |
| H | 0.112189  | 2.150736  | -0.564990 |
| H | -2.376339 | -1.609718 | 0.971062  |
| H | -1.858384 | -3.286043 | 1.122861  |
| H | 0.797328  | -1.126220 | -2.136762 |
| H | 0.444944  | 0.341689  | -3.019927 |
| H | -2.473069 | -3.119713 | -1.006676 |
| H | -0.860927 | -3.024678 | -1.150641 |
| H | -1.003404 | 0.189487  | -0.379279 |
| H | -1.532658 | 0.797743  | -1.913443 |
| H | -2.948435 | -0.962965 | -1.502617 |
| H | -1.859887 | -1.605488 | -2.732007 |
